# Supplementary material for: The Binding of Pseudomonas aeruginosa to Cystic Fibrosis Bronchial Epithelial Model Cells Alters the Composition of the Exosomes They Produce Compared to Healthy Control Cells
Source: MDPI journal article supplement (doi:10.3390/ijms25020895), 2024-01-11
Supplement: s1 [file s1]

**Supplementary Figure S1.**

Prediction of the molecular functions of the genes potentially regulated by miRNAs whose relative abundance levels in exosomes were altered by *P. aeruginosa* adherence using the PANTHER classification system. (A) Genes regulated by miRNAs upregulated in NuLi and in CuFi; (B) Genes regulated by miRNAs upregulated in NuLi; (C) Genes regulated by miRNAs that are downregulated in NuLi; (D) Genes regulated by miRNAs upregulated in CuFi; (E) Genes regulated by miRNAs that are downregulated in CuFi.

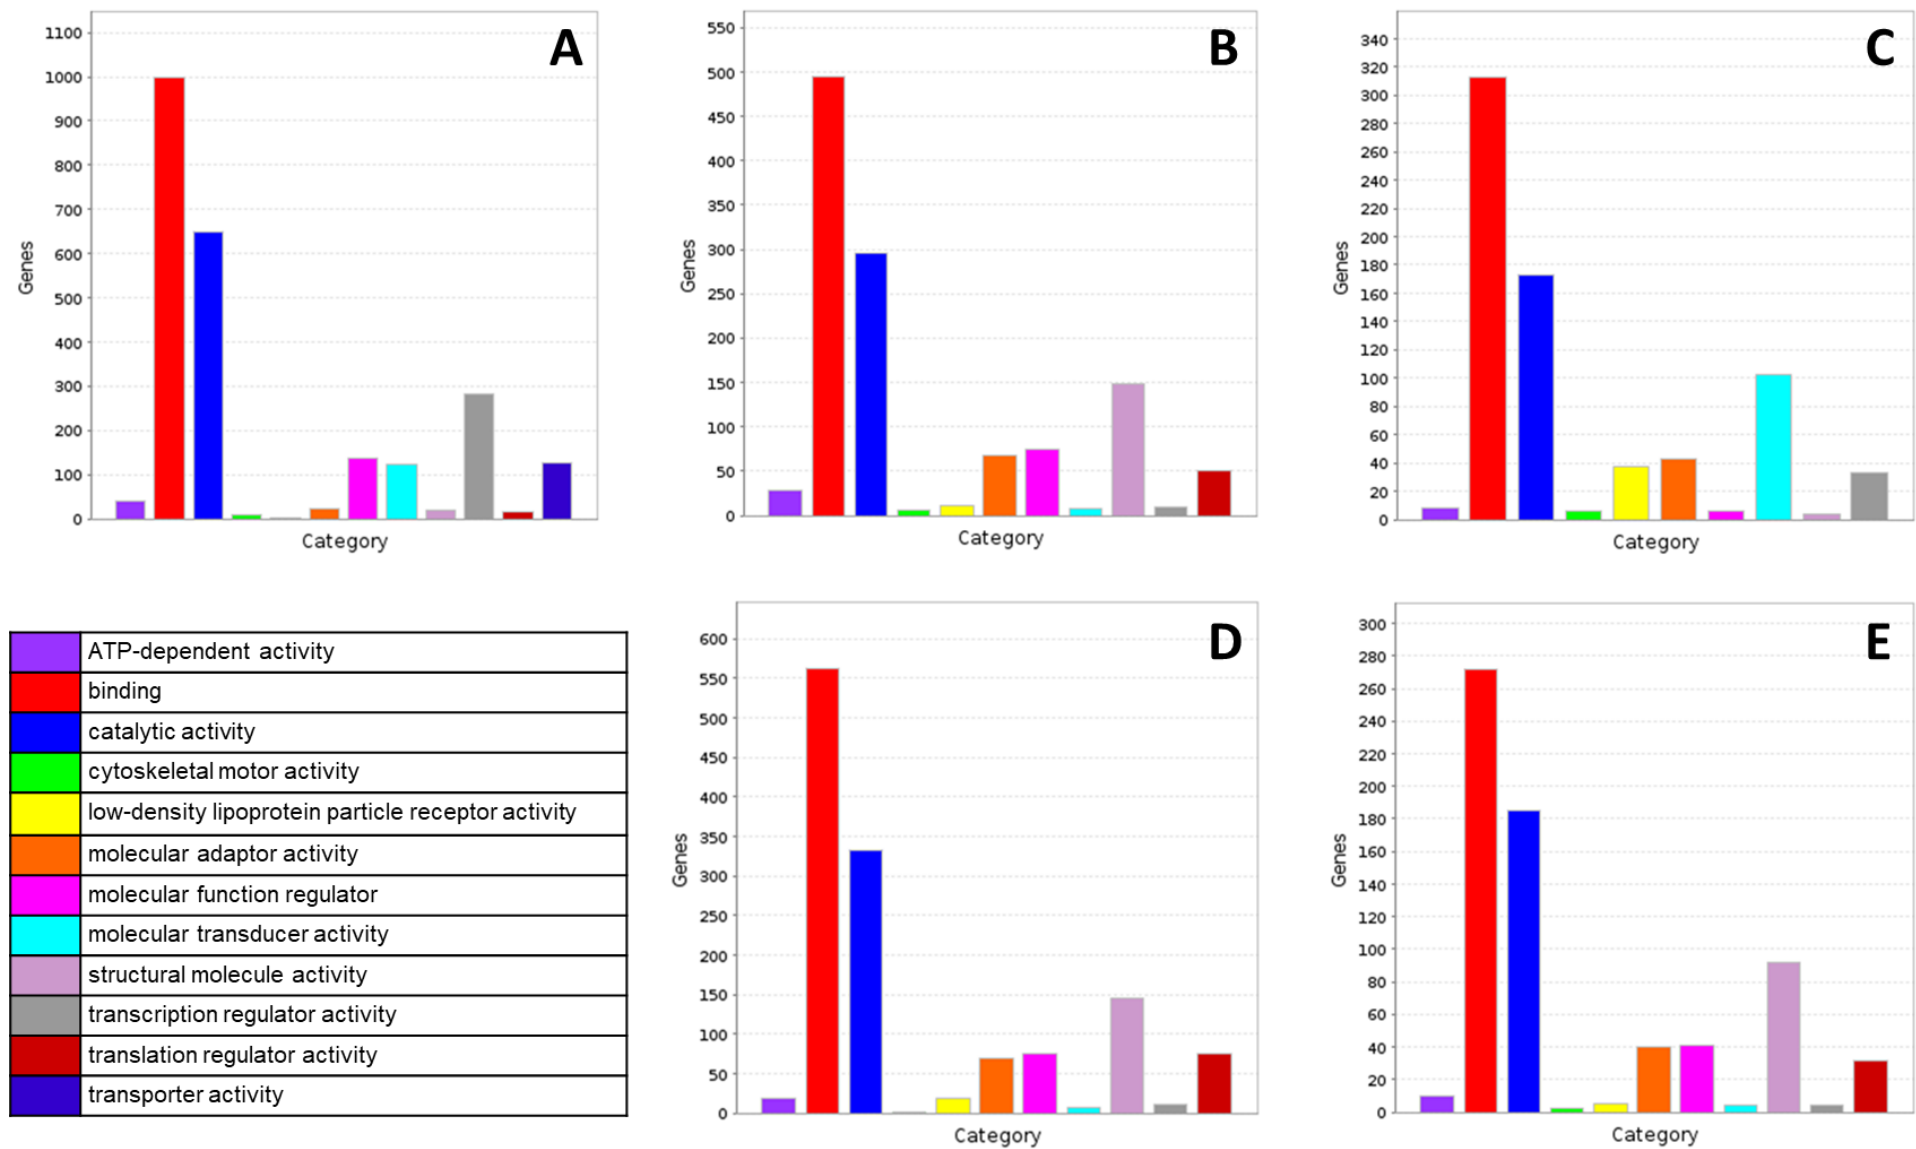

**Supplementary Table S1.** List of proteins identified by LC-MS/MS in exosomes isolated from NuLi and CuFi cell lines grown in isolation or in contact with *P. aeruginosa*.

| Protein symbol                     | Uniprot Entry | NuLi | NuLi + <i>P. aeruginosa</i> | CuFi | CuFi + <i>P. aeruginosa</i> |
|------------------------------------|---------------|------|-----------------------------|------|-----------------------------|
| TF                                 | P02787        | ✓    | ✓                           | ✓    | ✓                           |
| LGALS3BP                           | Q08380        | ✓    | ✓                           | ✓    | ✓                           |
| Immunoglobulin gamma-1 heavy chain | P0DOX5        | ✓    | ✓                           | ✓    | ✓                           |
| IGHG1                              | P01857        | ✓    | ✓                           | ✓    | ✓                           |
| HPX                                | P02790        | ✓    | ✓                           | ✓    | ✓                           |
| LAMC1                              | P11047        | ✓    | ✓                           | ✓    | ✓                           |
| PSMA7                              | O14818        | ✓    | ✓                           | ✓    | ✓                           |
| ITIH4                              | Q14624        | ✓    | ✓                           |      | ✓                           |
| AGRN                               | O00468        | ✓    | ✓                           | ✓    | ✓                           |
| PARK7                              | Q99497        | ✓    | ✓                           | ✓    | ✓                           |
| IGKC                               | P01834        | ✓    | ✓                           | ✓    | ✓                           |
| PSMA6                              | P60900        | ✓    | ✓                           | ✓    | ✓                           |
| HBB                                | P68871        | ✓    | ✓                           | ✓    | ✓                           |
| ALB                                | P02769        | ✓    | ✓                           | ✓    | ✓                           |
| HBG2                               | P69892        | ✓    | ✓                           | ✓    | ✓                           |
| HBE1                               | P02100        | ✓    | ✓                           | ✓    | ✓                           |
| HBG1                               | P69891        | ✓    | ✓                           | ✓    | ✓                           |
| PRDX4                              | Q13162        | ✓    | ✓                           | ✓    | ✓                           |
| THBS1                              | P07996        | ✓    | ✓                           | ✓    | ✓                           |
| COL7A1                             | Q02388        | ✓    | ✓                           | ✓    |                             |
| PSMA5                              | P28066        | ✓    | ✓                           | ✓    | ✓                           |
| GPI                                | P06744        | ✓    | ✓                           | ✓    | ✓                           |
| FN1                                | P02751        | ✓    | ✓                           | ✓    | ✓                           |
| DCD                                | P81605        | ✓    | ✓                           | ✓    | ✓                           |
| LAMB1                              | P07942        | ✓    | ✓                           | ✓    | ✓                           |
| KRT2                               | P35908        | ✓    | ✓                           | ✓    | ✓                           |
| PSMB4                              | P28070        | ✓    | ✓                           | ✓    | ✓                           |
| LAMA3                              | Q16787        | ✓    | ✓                           | ✓    | ✓                           |
| ALB                                | P02768        | ✓    | ✓                           | ✓    | ✓                           |
| DES                                | P17661        | ✓    | ✓                           | ✓    | ✓                           |
| KRT77                              | Q7Z794        | ✓    | ✓                           | ✓    | ✓                           |
| TAGLN                              | Q01995        | ✓    | ✓                           | ✓    | ✓                           |
| PSMA3                              | P25788        | ✓    | ✓                           | ✓    | ✓                           |
| CFL1                               | P23528        | ✓    | ✓                           | ✓    | ✓                           |
| COL6A1                             | P12109        | ✓    | ✓                           | ✓    | ✓                           |
| PRDX1                              | Q06830        | ✓    | ✓                           | ✓    | ✓                           |
| KRT1                               | P04264        | ✓    | ✓                           | ✓    | ✓                           |
| KRT78                              | Q8N1N4        | ✓    | ✓                           | ✓    | ✓                           |
| CALM3                              | P0DP25        | ✓    | ✓                           | ✓    | ✓                           |

|           |        |   |   |   |   |
|-----------|--------|---|---|---|---|
| NEFH      | P12036 | ✓ | ✓ | ✓ | ✓ |
| HBA1      | P69905 | ✓ | ✓ | ✓ | ✓ |
| NID1      | P14543 | ✓ | ✓ |   | ✓ |
| APOE      | P02649 | ✓ | ✓ | ✓ | ✓ |
| PSMB3     | P49720 | ✓ | ✓ |   | ✓ |
| KRT5      | P13647 | ✓ | ✓ | ✓ | ✓ |
| PRDX2     | P32119 | ✓ | ✓ | ✓ | ✓ |
| DPYSL2    | Q16555 | ✓ | ✓ | ✓ | ✓ |
| KRT9      | P35527 | ✓ | ✓ | ✓ | ✓ |
| BSG       | P35613 | ✓ | ✓ | ✓ | ✓ |
| ACTN1     | P12814 | ✓ | ✓ | ✓ | ✓ |
| KRT15     | P19012 | ✓ | ✓ | ✓ | ✓ |
| VIM       | P08670 | ✓ | ✓ | ✓ | ✓ |
| KRT18     | P05783 | ✓ | ✓ | ✓ | ✓ |
| NME1      | P15531 | ✓ | ✓ | ✓ | ✓ |
| KRT31     | Q15323 | ✓ | ✓ | ✓ | ✓ |
| A2M       | P01023 | ✓ | ✓ | ✓ | ✓ |
| ADAM10    | O14672 | ✓ | ✓ |   | ✓ |
| PSMA1     | P25786 | ✓ | ✓ | ✓ | ✓ |
| PSMA4     | P25789 | ✓ | ✓ | ✓ | ✓ |
| SERPINB12 | Q96P63 | ✓ | ✓ | ✓ | ✓ |
| DSC1      | Q08554 | ✓ | ✓ | ✓ | ✓ |
| ENO3      | P13929 | ✓ | ✓ | ✓ | ✓ |
| TGM3      | Q08188 | ✓ | ✓ | ✓ | ✓ |
| APRT      | P07741 | ✓ | ✓ | ✓ | ✓ |
| CSTA      | P01040 | ✓ | ✓ | ✓ | ✓ |
| SDCBP     | O00560 | ✓ | ✓ | ✓ | ✓ |
| CD63      | P08962 | ✓ | ✓ | ✓ | ✓ |
| SERPINE1  | P05121 | ✓ | ✓ | ✓ | ✓ |
| ACTN4     | O43707 | ✓ | ✓ | ✓ | ✓ |
| KRT6B     | P04259 | ✓ | ✓ | ✓ | ✓ |
| FTH1      | P02794 | ✓ | ✓ | ✓ | ✓ |
| NME2      | P22392 | ✓ | ✓ | ✓ | ✓ |
| TGFBI     | Q15582 | ✓ | ✓ | ✓ | ✓ |
| LAMC2     | Q13753 | ✓ | ✓ | ✓ | ✓ |
| KRT10     | P13645 | ✓ | ✓ | ✓ | ✓ |
| LAMA5     | O15230 | ✓ | ✓ | ✓ | ✓ |
| HSPA2     | P54652 | ✓ | ✓ | ✓ | ✓ |
| IGSF1     | Q8N6C5 | ✓ | ✓ | ✓ | ✓ |
| PEBP1     | P30086 | ✓ | ✓ | ✓ | ✓ |
| RAB2A     | P61019 | ✓ | ✓ | ✓ | ✓ |
| KRT80     | Q6KB66 | ✓ | ✓ | ✓ | ✓ |
| DSG1      | Q02413 | ✓ | ✓ | ✓ | ✓ |
| ARHGDIA   | P52565 | ✓ | ✓ | ✓ | ✓ |
| PSMB1     | P20618 | ✓ | ✓ | ✓ | ✓ |

|         |        |   |   |   |   |
|---------|--------|---|---|---|---|
| CD9     | P21926 | ✓ | ✓ | ✓ | ✓ |
| KRT6A   | P02538 | ✓ | ✓ | ✓ | ✓ |
| NUCB1   | Q02818 | ✓ | ✓ | ✓ | ✓ |
| PKM     | P14618 | ✓ | ✓ | ✓ | ✓ |
| ALDOC   | P09972 | ✓ | ✓ | ✓ | ✓ |
| PRDX5   | P30044 | ✓ | ✓ | ✓ | ✓ |
| ENO2    | P09104 | ✓ | ✓ | ✓ | ✓ |
| TRAP1   | Q12931 | ✓ | ✓ | ✓ | ✓ |
| FH      | P07954 | ✓ | ✓ | ✓ | ✓ |
| PKP1    | Q13835 | ✓ | ✓ | ✓ | ✓ |
| HSPA8   | P11142 | ✓ | ✓ | ✓ | ✓ |
| LAMB3   | Q13751 | ✓ | ✓ |   | ✓ |
| KRT12   | Q99456 | ✓ | ✓ | ✓ | ✓ |
| ITGB1   | P05556 | ✓ | ✓ | ✓ | ✓ |
| HSPA1B  | P0DMV9 | ✓ | ✓ | ✓ | ✓ |
| YWHAE   | P62258 | ✓ | ✓ | ✓ | ✓ |
| UGP2    | Q16851 | ✓ | ✓ | ✓ | ✓ |
| CKB     | P12277 | ✓ | ✓ | ✓ | ✓ |
| PSMB5   | P28074 | ✓ | ✓ | ✓ | ✓ |
| KRT19   | P08727 | ✓ | ✓ | ✓ | ✓ |
| YWHAG   | P61981 | ✓ | ✓ | ✓ | ✓ |
| HLA-B   | P01889 | ✓ | ✓ | ✓ | ✓ |
| YWHAZ   | P63104 | ✓ | ✓ | ✓ | ✓ |
| PDCD6IP | Q8WUM4 | ✓ | ✓ | ✓ | ✓ |
| PTGFRN  | Q9P2B2 | ✓ | ✓ | ✓ | ✓ |
| CSN1S2  | P02663 | ✓ | ✓ |   |   |
| TPI1    | P60174 | ✓ | ✓ | ✓ | ✓ |
| YWHAH   | Q04917 | ✓ | ✓ | ✓ | ✓ |
| ANXA2   | P07355 | ✓ | ✓ | ✓ | ✓ |
| RAP1B   | P61224 | ✓ | ✓ | ✓ | ✓ |
| RAP1A   | P62834 | ✓ | ✓ | ✓ | ✓ |
| LCP1    | P13796 | ✓ | ✓ |   | ✓ |
| FAT1    | Q14517 | ✓ | ✓ |   |   |
| EFNB1   | P98172 | ✓ | ✓ | ✓ | ✓ |
| KRT86   | O43790 | ✓ | ✓ |   | ✓ |
| KRT81   | Q14533 | ✓ | ✓ |   | ✓ |
| HSPA5   | P11021 | ✓ | ✓ | ✓ | ✓ |
| KRT14   | P02533 | ✓ | ✓ | ✓ | ✓ |
| RAC2    | P15153 | ✓ | ✓ | ✓ | ✓ |
| HNRNPK  | P61978 | ✓ | ✓ | ✓ | ✓ |
| ACTC1   | P68032 | ✓ | ✓ | ✓ | ✓ |
| ACTBL2  | Q562R1 | ✓ | ✓ | ✓ | ✓ |
| GNA13   | Q14344 | ✓ | ✓ | ✓ | ✓ |
| VCL     | P18206 | ✓ | ✓ | ✓ | ✓ |
| YWHAB   | P31946 | ✓ | ✓ | ✓ | ✓ |

|          |        |   |   |   |   |
|----------|--------|---|---|---|---|
| ITGA3    | P26006 | ✓ | ✓ | ✓ | ✓ |
| SFN      | P31947 | ✓ | ✓ | ✓ | ✓ |
| RAN      | P62826 | ✓ | ✓ | ✓ | ✓ |
| YWHAQ    | P27348 | ✓ | ✓ | ✓ | ✓ |
| KRT16    | P08779 | ✓ | ✓ | ✓ | ✓ |
| P4HB     | P07237 | ✓ | ✓ | ✓ | ✓ |
| CSN1S1   | P02662 | ✓ | ✓ | ✓ | ✓ |
| VAT1     | Q99536 | ✓ | ✓ | ✓ | ✓ |
| UCHL1    | P09936 | ✓ | ✓ | ✓ | ✓ |
| GDI2     | P50395 | ✓ | ✓ | ✓ | ✓ |
| NEFM     | P07197 | ✓ | ✓ | ✓ | ✓ |
| LDHA     | P00338 | ✓ | ✓ | ✓ | ✓ |
| RAB5C    | P51148 | ✓ | ✓ |   | ✓ |
| RAC1     | P63000 | ✓ | ✓ | ✓ | ✓ |
| SLC16A1  | P53985 | ✓ | ✓ | ✓ | ✓ |
| SELENBP1 | Q13228 | ✓ | ✓ | ✓ |   |
| ARG1     | P05089 | ✓ | ✓ | ✓ | ✓ |
| CDSN     | Q15517 | ✓ | ✓ | ✓ | ✓ |
| DNAJC5   | Q9H3Z4 | ✓ | ✓ | ✓ | ✓ |
| CAT      | P04040 | ✓ | ✓ | ✓ | ✓ |
| CSN3     | P02668 | ✓ | ✓ | ✓ |   |
| CALML5   | Q9NZT1 | ✓ | ✓ | ✓ | ✓ |
| CAPZB    | P47756 | ✓ | ✓ | ✓ | ✓ |
| SLC3A2   | P08195 | ✓ | ✓ | ✓ | ✓ |
| ACTG1    | P63261 | ✓ | ✓ | ✓ | ✓ |
| KRT17    | Q04695 | ✓ | ✓ | ✓ | ✓ |
| ACTB     | P60709 | ✓ | ✓ | ✓ | ✓ |
| ALDOA    | P00883 | ✓ | ✓ | ✓ | ✓ |
| ALDOA    | P04075 | ✓ | ✓ | ✓ | ✓ |
| ALDH9A1  | P49189 | ✓ | ✓ | ✓ | ✓ |
| RAB5A    | P20339 | ✓ | ✓ |   | ✓ |
| AHNAK    | Q09666 | ✓ | ✓ | ✓ | ✓ |
| LMAN1    | P49257 | ✓ | ✓ | ✓ |   |
| HSP90AB1 | P08238 | ✓ | ✓ | ✓ | ✓ |
| EZR      | P15311 | ✓ | ✓ | ✓ | ✓ |
| KRT74    | Q7RTS7 | ✓ | ✓ | ✓ | ✓ |
| KRT73    | Q86Y46 | ✓ | ✓ | ✓ | ✓ |
| NEFL     | P07196 | ✓ | ✓ | ✓ | ✓ |
| TXNL1    | Q43396 | ✓ | ✓ | ✓ | ✓ |
| LGALS1   | P09382 | ✓ | ✓ | ✓ | ✓ |
| CHMP4B   | Q9H444 | ✓ | ✓ | ✓ | ✓ |
| QSOX1    | O00391 | ✓ | ✓ |   |   |
| PYGM     | P11217 | ✓ | ✓ | ✓ | ✓ |
| PDIA3    | P30101 | ✓ | ✓ | ✓ | ✓ |
| S100A14  | Q9HCY8 | ✓ | ✓ | ✓ | ✓ |

|          |        |   |   |   |   |
|----------|--------|---|---|---|---|
| HSPB1    | P04792 | ✓ | ✓ | ✓ | ✓ |
| CRMP1    | Q14194 | ✓ | ✓ | ✓ | ✓ |
| HSPA4    | P34932 | ✓ | ✓ | ✓ | ✓ |
| CTSD     | P07339 | ✓ | ✓ | ✓ | ✓ |
| HLA-C    | P10321 | ✓ | ✓ | ✓ | ✓ |
| LMNA     | P02545 | ✓ | ✓ | ✓ | ✓ |
| RPSA     | P08865 | ✓ | ✓ | ✓ | ✓ |
| CD81     | P60033 | ✓ | ✓ | ✓ | ✓ |
| CD82     | P27701 | ✓ | ✓ |   |   |
| CD47     | Q08722 | ✓ | ✓ | ✓ |   |
| POTEE    | Q6S8J3 | ✓ | ✓ | ✓ | ✓ |
| PGK1     | P00558 | ✓ | ✓ | ✓ | ✓ |
| FLNB     | O75369 | ✓ | ✓ | ✓ | ✓ |
| HSP90AA1 | P07900 | ✓ | ✓ | ✓ | ✓ |
| PFN1     | P07737 | ✓ | ✓ | ✓ | ✓ |
| RDX      | P35241 | ✓ | ✓ | ✓ | ✓ |
| SERPINB5 | P36952 | ✓ | ✓ | ✓ | ✓ |
| PTPRF    | P10586 | ✓ | ✓ |   |   |
| ENO1     | P06733 | ✓ | ✓ | ✓ | ✓ |
| AHCY     | P23526 | ✓ | ✓ | ✓ | ✓ |
| GAPDH    | P04406 | ✓ | ✓ | ✓ | ✓ |
| KRT7     | P08729 | ✓ | ✓ | ✓ | ✓ |
| ALDH1A1  | P00352 | ✓ | ✓ | ✓ | ✓ |
| TUBA1B   | P68363 | ✓ | ✓ | ✓ | ✓ |
| TUBA1C   | Q9BQE3 | ✓ | ✓ | ✓ | ✓ |
| TUBB2B   | Q9BVA1 | ✓ | ✓ | ✓ | ✓ |
| RAB5B    | P61020 | ✓ | ✓ |   | ✓ |
| PGAM1    | P18669 | ✓ | ✓ | ✓ |   |
| FAM149B1 | Q96BN6 | ✓ | ✓ | ✓ |   |
| ANXA3    | P12429 | ✓ | ✓ | ✓ | ✓ |
| PSMC6    | P62333 | ✓ | ✓ | ✓ |   |
| MYL6     | P60660 | ✓ | ✓ | ✓ | ✓ |
| TSG101   | Q99816 | ✓ | ✓ |   |   |
| ATP1A1   | P05023 | ✓ | ✓ | ✓ | ✓ |
| ANXA5    | P08758 | ✓ | ✓ | ✓ | ✓ |
| TUBB2A   | Q13885 | ✓ | ✓ | ✓ | ✓ |
| HSP90B1  | P14625 | ✓ | ✓ | ✓ | ✓ |
| DSP      | P15924 | ✓ | ✓ | ✓ | ✓ |
| BASP1    | P80723 | ✓ | ✓ | ✓ | ✓ |
| SLC1A5   | Q15758 | ✓ | ✓ |   | ✓ |
| TUBB     | P07437 | ✓ | ✓ | ✓ | ✓ |
| ATP1A3   | P13637 | ✓ | ✓ | ✓ | ✓ |
| PPIA     | P62937 | ✓ | ✓ | ✓ | ✓ |
| DDB1     | Q16531 | ✓ | ✓ | ✓ | ✓ |
| VPS35    | Q96QK1 | ✓ | ✓ | ✓ | ✓ |

|           |        |   |   |   |   |
|-----------|--------|---|---|---|---|
| TMEM163   | Q8TC26 | ✓ | ✓ |   |   |
| TUBB4B    | P68371 | ✓ | ✓ | ✓ | ✓ |
| RPS3      | P23396 | ✓ | ✓ | ✓ | ✓ |
| EGFR      | P00533 | ✓ | ✓ |   | ✓ |
| KRT8      | P05787 | ✓ | ✓ | ✓ | ✓ |
| RAB35     | Q15286 | ✓ | ✓ | ✓ | ✓ |
| HLA-A     | P04439 | ✓ | ✓ | ✓ | ✓ |
| CS        | O75390 | ✓ | ✓ |   | ✓ |
| HSP90AB4P | Q58FF6 | ✓ | ✓ | ✓ | ✓ |
| FLNA      | P21333 | ✓ | ✓ | ✓ | ✓ |
| EEF1A2    | Q05639 | ✓ | ✓ | ✓ | ✓ |
| RAB3A     | P20336 | ✓ | ✓ | ✓ | ✓ |
| PPIB      | P23284 | ✓ | ✓ | ✓ | ✓ |
| RAB15     | P59190 | ✓ | ✓ | ✓ | ✓ |
| GNAS      | Q5JWF2 | ✓ | ✓ | ✓ | ✓ |
| GNAS      | P63092 | ✓ | ✓ | ✓ | ✓ |
| INA       | Q16352 | ✓ | ✓ | ✓ | ✓ |
| UBC       | P0CG48 | ✓ | ✓ | ✓ | ✓ |
| UBB       | P0CG47 | ✓ | ✓ | ✓ | ✓ |
| UBA52     | P62987 | ✓ | ✓ | ✓ | ✓ |
| RPS27A    | P62979 | ✓ | ✓ | ✓ | ✓ |
| TUBB6     | Q9BUF5 | ✓ | ✓ | ✓ | ✓ |
| EEF1A1    | P68104 | ✓ | ✓ | ✓ | ✓ |
| EEF1A1P5  | Q5VTE0 | ✓ | ✓ | ✓ | ✓ |
| EEF1G     | P26641 | ✓ | ✓ | ✓ | ✓ |
| C3        | P01024 | ✓ | ✓ |   | ✓ |
| PRDX6     | P30041 | ✓ | ✓ | ✓ |   |
| PGAM4     | Q8N0Y7 | ✓ | ✓ |   |   |
| GDI1      | P31150 | ✓ | ✓ |   |   |
| PGD       | P52209 | ✓ | ✓ | ✓ | ✓ |
| SEPTIN9   | Q9UHD8 | ✓ | ✓ | ✓ | ✓ |
| MFGE8     | Q08431 | ✓ | ✓ |   | ✓ |
| SEC22B    | O75396 | ✓ | ✓ |   |   |
| TACSTD2   | P09758 | ✓ | ✓ | ✓ |   |
| EIF2S3    | P41091 | ✓ | ✓ | ✓ | ✓ |
| TGM1      | P22735 | ✓ | ✓ | ✓ | ✓ |
| FGFBP1    | Q14512 | ✓ | ✓ | ✓ |   |
| AMY2B     | P19961 | ✓ | ✓ | ✓ |   |
| AMY2A     | P04746 | ✓ | ✓ | ✓ |   |
| AMY1A     | P0DUB6 | ✓ | ✓ | ✓ |   |
| PLD3      | Q8IV08 | ✓ | ✓ |   |   |
| TSN       | Q15631 | ✓ | ✓ |   |   |
| ANXA7     | P20073 | ✓ | ✓ |   |   |
| TUBB3     | Q13509 | ✓ | ✓ | ✓ | ✓ |
| MSN       | P26038 | ✓ | ✓ | ✓ | ✓ |

|           |        |   |   |   |   |
|-----------|--------|---|---|---|---|
| ATP1A2    | P50993 | ✓ | ✓ | ✓ | ✓ |
| EPHA2     | P29317 | ✓ | ✓ | ✓ | ✓ |
| GSTP1     | P09211 | ✓ | ✓ | ✓ | ✓ |
| RAB1B     | Q9H0U4 | ✓ | ✓ | ✓ | ✓ |
| ITGB4     | P16144 | ✓ | ✓ | ✓ | ✓ |
| EIF4A2    | Q14240 | ✓ | ✓ | ✓ | ✓ |
| ARRDC1    | Q8N5I2 | ✓ | ✓ |   | ✓ |
| HSPG2     | P98160 | ✓ | ✓ | ✓ | ✓ |
| PYGL      | P06737 | ✓ | ✓ | ✓ | ✓ |
| RAB11B    | Q15907 | ✓ | ✓ | ✓ | ✓ |
| TUBB4A    | P04350 | ✓ | ✓ | ✓ | ✓ |
| PGM1      | P36871 | ✓ | ✓ | ✓ | ✓ |
| ANXA6     | P08133 | ✓ | ✓ | ✓ | ✓ |
| ANPEP     | P15144 | ✓ | ✓ | ✓ | ✓ |
| RAB1A     | P62820 | ✓ | ✓ | ✓ | ✓ |
| WDR1      | O75083 | ✓ | ✓ | ✓ | ✓ |
| TARS1     | P26639 | ✓ | ✓ | ✓ | ✓ |
| VAMP3     | Q15836 | ✓ | ✓ | ✓ | ✓ |
| ALDH1A2   | O94788 | ✓ | ✓ |   | ✓ |
| PPP1CB    | P62140 | ✓ | ✓ | ✓ | ✓ |
| ITGB6     | P18564 | ✓ | ✓ | ✓ |   |
| GMPPB     | Q9Y5P6 | ✓ | ✓ | ✓ | ✓ |
| TMED9     | Q9BVK6 | ✓ | ✓ | ✓ | ✓ |
| SF3B3     | Q15393 | ✓ | ✓ | ✓ | ✓ |
| UBE2V1    | Q13404 | ✓ | ✓ | ✓ | ✓ |
| OTUB1     | Q96FW1 | ✓ | ✓ |   | ✓ |
| ERP29     | P30040 | ✓ | ✓ |   |   |
| HNRNPA2B1 | P22626 | ✓ | ✓ |   |   |
| CTNNA1    | P35221 | ✓ | ✓ | ✓ | ✓ |
| SLC7A5    | Q01650 | ✓ | ✓ | ✓ | ✓ |
| ANXA1     | P04083 | ✓ | ✓ | ✓ | ✓ |
| PYGB      | P11216 | ✓ | ✓ | ✓ | ✓ |
| EEF2      | P13639 | ✓ | ✓ | ✓ | ✓ |
| ITGA2     | P17301 | ✓ | ✓ | ✓ | ✓ |
| RAB3B     | P20337 | ✓ | ✓ | ✓ | ✓ |
| COL12A1   | Q99715 | ✓ | ✓ | ✓ | ✓ |
| RAB3D     | O95716 | ✓ | ✓ | ✓ | ✓ |
| ITGA6     | P23229 | ✓ | ✓ | ✓ | ✓ |
| RAB3C     | Q96E17 | ✓ | ✓ | ✓ | ✓ |
| GNB2      | P62879 | ✓ | ✓ | ✓ | ✓ |
| GNB1      | P62873 | ✓ | ✓ | ✓ | ✓ |
| VAMP2     | P63027 | ✓ | ✓ | ✓ | ✓ |
| EHD3      | Q9NZN3 | ✓ | ✓ | ✓ | ✓ |
| GNG12     | Q9UBI6 | ✓ | ✓ | ✓ | ✓ |
| PDCD6     | O75340 | ✓ | ✓ | ✓ | ✓ |



|          |        |   |   |   |   |
|----------|--------|---|---|---|---|
| S100A9   | P06702 | ✓ | ✓ | ✓ | ✓ |
| USP14    | P54578 | ✓ | ✓ | ✓ |   |
| IGSF8    | Q969P0 | ✓ | ✓ | ✓ | ✓ |
| PPP3CA   | Q08209 | ✓ | ✓ | ✓ | ✓ |
| TUBA4A   | P68366 | ✓ | ✓ | ✓ | ✓ |
| EIF4A1   | P60842 | ✓ | ✓ | ✓ | ✓ |
| DPYSL3   | Q14195 | ✓ | ✓ | ✓ | ✓ |
| HYOU1    | Q9Y4L1 | ✓ | ✓ | ✓ | ✓ |
| EHD2     | Q9NZN4 | ✓ | ✓ | ✓ | ✓ |
| UBA1     | P22314 | ✓ | ✓ | ✓ | ✓ |
| RAB7A    | P51149 | ✓ | ✓ |   |   |
| ACO1     | P21399 | ✓ | ✓ | ✓ | ✓ |
| PGM2     | Q96G03 | ✓ | ✓ |   | ✓ |
| CLIC1    | O00299 | ✓ | ✓ | ✓ | ✓ |
| GSN      | P06396 | ✓ | ✓ | ✓ | ✓ |
| STAT1    | P42224 | ✓ | ✓ | ✓ |   |
| MAP1B    | P46821 | ✓ | ✓ |   |   |
| MPZL1    | O95297 | ✓ | ✓ | ✓ | ✓ |
| LSR      | Q86X29 | ✓ | ✓ |   |   |
| ATP5F1B  | P06576 | ✓ | ✓ | ✓ | ✓ |
| LDHB     | P07195 | ✓ | ✓ | ✓ | ✓ |
| PAFAH1B1 | P43034 | ✓ | ✓ | ✓ | ✓ |
| EHD1     | Q9H4M9 | ✓ | ✓ | ✓ | ✓ |
| NPEPPS   | P55786 | ✓ | ✓ | ✓ | ✓ |
| ANXA4    | P09525 | ✓ | ✓ | ✓ |   |
| PSMC2    | P35998 | ✓ | ✓ | ✓ | ✓ |
| FSCN1    | Q16658 | ✓ | ✓ | ✓ | ✓ |
| CASP14   | P31944 | ✓ | ✓ |   | ✓ |
| RPL11    | P62913 | ✓ | ✓ | ✓ | ✓ |
| AK1      | P00568 | ✓ | ✓ |   |   |
| RPL18    | Q07020 | ✓ | ✓ |   |   |
| B4GAT1   | O43505 | ✓ | ✓ |   |   |
| PLS3     | P13797 | ✓ | ✓ |   |   |
| VCP      | P55072 | ✓ | ✓ | ✓ | ✓ |
| STOM     | P27105 | ✓ | ✓ | ✓ | ✓ |
| PLXNB2   | O15031 | ✓ | ✓ | ✓ | ✓ |
| GNAI3    | P08754 | ✓ | ✓ | ✓ | ✓ |
| JUP      | P14923 | ✓ | ✓ | ✓ | ✓ |
| LRP1     | Q07954 | ✓ | ✓ |   |   |
| SEPTIN2  | Q15019 | ✓ | ✓ | ✓ | ✓ |
| CPNE3    | O75131 | ✓ | ✓ | ✓ | ✓ |
| ATP1B1   | P05026 | ✓ | ✓ | ✓ |   |
| IST1     | P53990 | ✓ | ✓ | ✓ | ✓ |
| AKR1A1   | P14550 | ✓ | ✓ |   | ✓ |
| XPO1     | O14980 | ✓ | ✓ |   | ✓ |

|          |        |   |   |   |   |
|----------|--------|---|---|---|---|
| TCP1     | P17987 | ✓ | ✓ | ✓ | ✓ |
| ALCAM    | Q13740 | ✓ | ✓ |   |   |
| ATP6V0A1 | Q93050 | ✓ | ✓ |   |   |
| RPS16    | P62249 | ✓ | ✓ | ✓ | ✓ |
| PSMC3    | P17980 | ✓ | ✓ |   |   |
| CTNNB1   | P35222 | ✓ | ✓ | ✓ | ✓ |
| SPTAN1   | Q13813 | ✓ | ✓ | ✓ | ✓ |
| ATP5F1A  | P25705 | ✓ | ✓ | ✓ | ✓ |
| GNAO1    | P09471 | ✓ | ✓ |   | ✓ |
| SPTBN1   | Q01082 | ✓ | ✓ | ✓ | ✓ |
| PSMD11   | O00231 | ✓ | ✓ |   |   |
| SLC16A3  | O15427 | ✓ | ✓ | ✓ |   |
| MARCKS   | P29966 | ✓ | ✓ | ✓ | ✓ |
| SEPTIN11 | Q9NVA2 | ✓ | ✓ | ✓ | ✓ |
| ATIC     | P31939 | ✓ | ✓ |   | ✓ |
| FMNL2    | Q96PY5 | ✓ | ✓ |   |   |
| LRBA     | P50851 | ✓ | ✓ | ✓ | ✓ |
| CANX     | P27824 | ✓ | ✓ |   |   |
| ATP2B1   | P20020 | ✓ | ✓ | ✓ | ✓ |
| ITGA5    | P08648 | ✓ | ✓ |   | ✓ |
| RTCB     | Q9Y3I0 | ✓ | ✓ | ✓ | ✓ |
| ALDH2    | P05091 | ✓ | ✓ |   |   |
| CAND1    | Q86VP6 | ✓ | ✓ |   |   |
| ATP2B4   | P23634 | ✓ | ✓ | ✓ | ✓ |
| ARF5     | P84085 | ✓ | ✓ | ✓ |   |
| EHD4     | Q9H223 | ✓ | ✓ | ✓ | ✓ |
| KIF5B    | P33176 | ✓ | ✓ |   |   |
| ITGAV    | P06756 | ✓ | ✓ | ✓ |   |
| NT5E     | P21589 | ✓ | ✓ | ✓ | ✓ |
| PLXNA2   | O75051 | ✓ | ✓ | ✓ | ✓ |
| PFKP     | Q01813 | ✓ | ✓ | ✓ |   |
| RAB14    | P61106 | ✓ | ✓ | ✓ | ✓ |
| CLTC     | Q00610 | ✓ | ✓ | ✓ | ✓ |
| GNAI2    | P04899 | ✓ | ✓ | ✓ | ✓ |
| ARF3     | P61204 | ✓ | ✓ | ✓ |   |
| ARF1     | P84077 | ✓ | ✓ | ✓ |   |
| H4C1     | P62805 | ✓ | ✓ | ✓ | ✓ |
| NSF      | P46459 | ✓ | ✓ |   |   |
| COPA     | P53621 | ✓ | ✓ | ✓ | ✓ |
| KRT6C    | P48668 | ✓ |   | ✓ | ✓ |
| ACTA1    | P68133 | ✓ |   | ✓ | ✓ |
| ACTA2    | P62736 | ✓ |   | ✓ | ✓ |
| ACTG2    | P63267 | ✓ |   | ✓ | ✓ |
| KRT15    | O77727 | ✓ |   | ✓ | ✓ |
| HBD      | P02042 | ✓ |   | ✓ | ✓ |

|           |        |   |  |   |   |
|-----------|--------|---|--|---|---|
| KRT79     | Q5XKE5 | ✓ |  | ✓ | ✓ |
| KRT13     | P13646 | ✓ |  | ✓ | ✓ |
| KRT75     | O95678 | ✓ |  | ✓ | ✓ |
| KRT3      | P12035 | ✓ |  | ✓ | ✓ |
| THBS2     | P35442 | ✓ |  | ✓ | ✓ |
| KRT24     | Q2M2I5 | ✓ |  | ✓ | ✓ |
| KRT28     | Q7Z3Y7 | ✓ |  | ✓ | ✓ |
| POTEF     | A5A3E0 | ✓ |  | ✓ | ✓ |
| VCAN      | P13611 | ✓ |  | ✓ | ✓ |
| ANXA2P2   | A6NMY6 | ✓ |  | ✓ | ✓ |
| POTEKP    | Q9BYX7 | ✓ |  | ✓ | ✓ |
| TUBA1A    | Q71U36 | ✓ |  | ✓ | ✓ |
| KRT76     | Q01546 | ✓ |  | ✓ | ✓ |
| APOD      | P05090 | ✓ |  | ✓ | ✓ |
| PSMA8     | Q8TAA3 | ✓ |  | ✓ | ✓ |
| CFI       | P05156 | ✓ |  |   | ✓ |
| TUBA3E    | Q6PEY2 | ✓ |  | ✓ | ✓ |
| FAT2      | Q9NYQ8 | ✓ |  |   |   |
| TUBA3C    | P0DPH7 | ✓ |  | ✓ | ✓ |
| LAMA1     | P25391 | ✓ |  |   |   |
| IGHA1     | P01876 | ✓ |  | ✓ | ✓ |
| HSPA1L    | P34931 | ✓ |  | ✓ | ✓ |
| EFEMP1    | Q12805 | ✓ |  | ✓ |   |
| KRT27     | Q7Z3Y8 | ✓ |  | ✓ | ✓ |
| KRT25     | Q7Z3Z0 | ✓ |  | ✓ | ✓ |
| KRT33B    | Q14525 | ✓ |  | ✓ | ✓ |
| IGHG3     | P01860 | ✓ |  | ✓ | ✓ |
| lacZ      | P00722 | ✓ |  | ✓ | ✓ |
| LYZ       | P00698 | ✓ |  | ✓ | ✓ |
| CST3      | P01034 | ✓ |  | ✓ | ✓ |
| IGHG2     | P01859 | ✓ |  | ✓ | ✓ |
| HSPA6     | P17066 | ✓ |  | ✓ | ✓ |
| TIMP1     | P01033 | ✓ |  | ✓ | ✓ |
| HSPA7     | P48741 | ✓ |  | ✓ | ✓ |
| TUBB8     | Q3ZCM7 | ✓ |  | ✓ | ✓ |
| HSP90AB3P | Q58FF7 | ✓ |  | ✓ | ✓ |
| LTF       | P02788 | ✓ |  | ✓ | ✓ |
| TUBB8B    | A6NNZ2 | ✓ |  | ✓ | ✓ |
| KRT35     | Q92764 | ✓ |  | ✓ | ✓ |
| KRT36     | O76013 | ✓ |  | ✓ | ✓ |
| KRT37     | O76014 | ✓ |  | ✓ | ✓ |
| KRT32     | Q14532 | ✓ |  | ✓ | ✓ |
| KRT38     | O76015 | ✓ |  | ✓ | ✓ |
| TPM2      | P07951 | ✓ |  |   | ✓ |
| POTEI     | P0CG38 | ✓ |  | ✓ | ✓ |

|                                       |        |   |  |   |   |
|---------------------------------------|--------|---|--|---|---|
| TUBB1                                 | Q9H4B7 | ✓ |  | ✓ | ✓ |
| HSP90AA2P                             | Q14568 | ✓ |  | ✓ | ✓ |
| TPM4                                  | P67936 | ✓ |  |   | ✓ |
| LCN1                                  | P31025 | ✓ |  | ✓ | ✓ |
| CFB                                   | P00751 | ✓ |  |   | ✓ |
| CHGA                                  | P10645 | ✓ |  | ✓ | ✓ |
| KRT71                                 | Q3SY84 | ✓ |  | ✓ | ✓ |
| THBS3                                 | P49746 | ✓ |  |   |   |
| KRT72                                 | Q14CN4 | ✓ |  | ✓ | ✓ |
| AZGP1                                 | P25311 | ✓ |  | ✓ | ✓ |
| CFL2                                  | Q9Y281 | ✓ |  | ✓ | ✓ |
| ACTN3                                 | Q08043 | ✓ |  | ✓ | ✓ |
| TUBA8                                 | Q9NY65 | ✓ |  | ✓ | ✓ |
| KRT84                                 | Q9NSB2 | ✓ |  | ✓ | ✓ |
| HSP90AB2P                             | Q58FF8 | ✓ |  | ✓ | ✓ |
| POTEJ                                 | P0CG39 | ✓ |  | ✓ | ✓ |
| RAB1C                                 | Q92928 | ✓ |  | ✓ | ✓ |
| IGHG4                                 | P01861 | ✓ |  |   | ✓ |
| PSMB6                                 | P28072 | ✓ |  | ✓ | ✓ |
| GNA12                                 | Q03113 | ✓ |  | ✓ | ✓ |
| KPRP                                  | Q5T749 | ✓ |  | ✓ | ✓ |
| Immunoglobulin<br>alpha-2 heavy chain | P0DOX2 | ✓ |  | ✓ | ✓ |
| PIP                                   | P12273 | ✓ |  | ✓ |   |
| IGHA2                                 | P01877 | ✓ |  | ✓ | ✓ |
| GAPDHS                                | O14556 | ✓ |  | ✓ | ✓ |
| RAB2B                                 | Q8WUD1 | ✓ |  | ✓ | ✓ |
| LYZ                                   | P61626 | ✓ |  | ✓ | ✓ |
| PKLR                                  | P30613 | ✓ |  | ✓ | ✓ |
| KRT4                                  | P19013 | ✓ |  | ✓ | ✓ |
| SPARC                                 | P09486 | ✓ |  | ✓ | ✓ |
| PTX3                                  | P26022 | ✓ |  |   | ✓ |
| DKK3                                  | Q9UBP4 | ✓ |  |   |   |
| NME2P1                                | O60361 | ✓ |  | ✓ |   |
| CLSTN1                                | O94985 | ✓ |  | ✓ | ✓ |
| IGFBP7                                | Q16270 | ✓ |  | ✓ | ✓ |
| PZP                                   | P20742 | ✓ |  |   | ✓ |
| GLOD4                                 | Q9HC38 | ✓ |  | ✓ | ✓ |
| PSMB2                                 | P49721 | ✓ |  | ✓ | ✓ |
| TPM1                                  | P09493 | ✓ |  |   | ✓ |
| RAC3                                  | P60763 | ✓ |  | ✓ | ✓ |
| TPM3                                  | P06753 | ✓ |  |   | ✓ |
| TUBA4B                                | Q9H853 | ✓ |  | ✓ | ✓ |
| SET                                   | Q01105 | ✓ |  | ✓ | ✓ |
| CLU                                   | P10909 | ✓ |  |   |   |

|                                            |        |   |  |   |   |
|--------------------------------------------|--------|---|--|---|---|
| S100A7                                     | P31151 | ✓ |  | ✓ | ✓ |
| S100A8                                     | P05109 | ✓ |  | ✓ | ✓ |
| TXN                                        | P10599 | ✓ |  | ✓ | ✓ |
| LACRT                                      | Q9GZZ8 | ✓ |  | ✓ | ✓ |
| XP32                                       | Q5T750 | ✓ |  | ✓ | ✓ |
| HLA-H                                      | P01893 | ✓ |  | ✓ | ✓ |
| ST13                                       | P50502 | ✓ |  | ✓ | ✓ |
| SDC1                                       | P18827 | ✓ |  | ✓ | ✓ |
| ST13P5                                     | Q8NFI4 | ✓ |  | ✓ | ✓ |
| SKP1                                       | P63208 | ✓ |  | ✓ | ✓ |
| EEF1B2                                     | P24534 | ✓ |  | ✓ | ✓ |
| RRBP1                                      | Q9P2E9 | ✓ |  | ✓ | ✓ |
| NPEPPSL1                                   | A6NEC2 | ✓ |  | ✓ | ✓ |
| APP                                        | P05067 | ✓ |  |   |   |
| PTMA                                       | P06454 | ✓ |  | ✓ | ✓ |
| RAB11A                                     | P62491 | ✓ |  | ✓ | ✓ |
| SERPINI1                                   | Q99574 | ✓ |  |   | ✓ |
| MDH1                                       | P40925 | ✓ |  | ✓ | ✓ |
| S100A2                                     | P29034 | ✓ |  | ✓ | ✓ |
| ST13P4                                     | Q8IZP2 | ✓ |  | ✓ | ✓ |
| PSMA2                                      | P25787 | ✓ |  | ✓ | ✓ |
| TMSB4X                                     | P62328 | ✓ |  |   | ✓ |
| HSP90AA5P                                  | Q58FG0 | ✓ |  | ✓ | ✓ |
| Ras-related protein<br>Rap-1b-like protein | A6NIZ1 | ✓ |  | ✓ | ✓ |
| DSTN                                       | P60981 | ✓ |  | ✓ | ✓ |
| GLUD1                                      | P00366 | ✓ |  | ✓ | ✓ |
| GLUD2                                      | P49448 | ✓ |  | ✓ | ✓ |
| GLUD1                                      | P00367 | ✓ |  | ✓ | ✓ |
| PRSS23                                     | O95084 | ✓ |  | ✓ |   |
| GNB4                                       | Q9HAV0 | ✓ |  | ✓ | ✓ |
| LCN1P1                                     | Q5VSP4 | ✓ |  | ✓ | ✓ |
| GPX3                                       | P22352 | ✓ |  |   |   |
| KRT87P                                     | A6NCN2 | ✓ |  |   | ✓ |
| KRT85                                      | P78386 | ✓ |  |   | ✓ |
| KRT83                                      | P78385 | ✓ |  |   | ✓ |
| CA2                                        | P00921 | ✓ |  |   |   |
| M6PR                                       | P20645 | ✓ |  | ✓ | ✓ |
| CHST6                                      | Q9GZX3 | ✓ |  |   |   |
| XPNPEP3                                    | Q9NQH7 | ✓ |  | ✓ | ✓ |
| HSP90B2P                                   | Q58FF3 | ✓ |  | ✓ | ✓ |
| TADA2B                                     | Q86TJ2 | ✓ |  | ✓ | ✓ |
| FBN1                                       | P35555 | ✓ |  |   |   |
| CTNNA2                                     | P26232 | ✓ |  | ✓ | ✓ |
| DNPEP                                      | Q9ULA0 | ✓ |  |   | ✓ |

|           |        |   |  |   |   |
|-----------|--------|---|--|---|---|
| TMBIM1    | Q969X1 | ✓ |  | ✓ | ✓ |
| CSPG4     | Q6UVK1 | ✓ |  |   |   |
| PCSK9     | Q8NBP7 | ✓ |  |   | ✓ |
| ATP1A4    | Q13733 | ✓ |  | ✓ | ✓ |
| TIMP2     | P16035 | ✓ |  | ✓ | ✓ |
| SDCBP2    | Q9H190 | ✓ |  | ✓ | ✓ |
| ACTN2     | P35609 | ✓ |  | ✓ | ✓ |
| ERO1A     | Q96HE7 | ✓ |  | ✓ | ✓ |
| PLOD2     | O00469 | ✓ |  | ✓ | ✓ |
| SDC4      | P31431 | ✓ |  | ✓ | ✓ |
| PGAM2     | P15259 | ✓ |  |   |   |
| STIP1     | P31948 | ✓ |  | ✓ |   |
| MYL6B     | P14649 | ✓ |  | ✓ | ✓ |
| GPC1      | P35052 | ✓ |  |   |   |
| KRT33A    | O76009 | ✓ |  |   | ✓ |
| RPLP2     | P05387 | ✓ |  | ✓ | ✓ |
| PGK2      | P07205 | ✓ |  | ✓ | ✓ |
| STMN1     | P16949 | ✓ |  |   | ✓ |
| CAPZA1    | P52907 | ✓ |  | ✓ | ✓ |
| ALOX12B   | O75342 | ✓ |  | ✓ | ✓ |
| PRPH      | P41219 | ✓ |  | ✓ | ✓ |
| FABP5     | Q01469 | ✓ |  | ✓ | ✓ |
| HDGFL3    | Q9Y3E1 | ✓ |  | ✓ | ✓ |
| LDLR      | P01130 | ✓ |  |   | ✓ |
| ITIH2     | P19823 | ✓ |  |   | ✓ |
| NPC2      | P61916 | ✓ |  |   |   |
| CPB2      | Q96IY4 | ✓ |  |   | ✓ |
| CAPZA2    | P47755 | ✓ |  | ✓ | ✓ |
| FSTL1     | Q12841 | ✓ |  |   |   |
| PTMS      | P20962 | ✓ |  |   |   |
| PGLYRP2   | Q96PD5 | ✓ |  |   |   |
| HSP90AA4P | Q58FG1 | ✓ |  |   |   |
| MAPT      | P10636 | ✓ |  |   |   |
| SCG2      | P13521 | ✓ |  | ✓ | ✓ |
| AXL       | P30530 | ✓ |  |   |   |
| SPOCK3    | Q9BQ16 | ✓ |  |   |   |
| SPOCK1    | Q08629 | ✓ |  |   |   |
| SLC7A7    | Q9UM01 | ✓ |  | ✓ | ✓ |
| SLC7A6    | Q92536 | ✓ |  | ✓ | ✓ |
| FICD      | Q9BVA6 | ✓ |  |   |   |
| MANF      | P55145 | ✓ |  |   |   |
| DSG2      | Q14126 | ✓ |  |   |   |
| CCN1      | O00622 | ✓ |  |   |   |
| SCAMP2    | O15127 | ✓ |  | ✓ | ✓ |
| HSPE1     | P61604 | ✓ |  | ✓ | ✓ |

|                                     |        |   |  |   |   |
|-------------------------------------|--------|---|--|---|---|
| SYPL1                               | Q16563 | ✓ |  | ✓ | ✓ |
| APOA1                               | P02647 | ✓ |  |   |   |
| HLA-G                               | P17693 | ✓ |  | ✓ | ✓ |
| CDH3                                | P22223 | ✓ |  | ✓ | ✓ |
| CCBE1                               | Q6UXH8 | ✓ |  |   |   |
| DBN1                                | Q16643 | ✓ |  | ✓ |   |
| ATP2B3                              | Q16720 | ✓ |  | ✓ | ✓ |
| Immunoglobulin<br>kappa light chain | P0DOX7 | ✓ |  | ✓ | ✓ |
| EPCAM                               | P16422 | ✓ |  |   |   |
| CSRP1                               | P21291 | ✓ |  |   |   |
| PTPRK                               | Q15262 | ✓ |  |   |   |
| SLC38A2                             | Q96QD8 | ✓ |  | ✓ | ✓ |
| KTN1                                | Q86UP2 | ✓ |  | ✓ | ✓ |
| EEF1D                               | P29692 | ✓ |  | ✓ | ✓ |
| HLA-E                               | P13747 | ✓ |  | ✓ | ✓ |
| MTPN                                | P58546 | ✓ |  | ✓ | ✓ |
| MCAM                                | P43121 | ✓ |  | ✓ | ✓ |
| STX12                               | Q86Y82 | ✓ |  |   |   |
| EIF5AL1                             | Q6IS14 | ✓ |  | ✓ | ✓ |
| EIF5A                               | P63241 | ✓ |  | ✓ | ✓ |
| AP3D1                               | O14617 | ✓ |  | ✓ | ✓ |
| CAV1                                | Q03135 | ✓ |  | ✓ | ✓ |
| SH3BGRL                             | O75368 | ✓ |  |   |   |
| LAMP2                               | P13473 | ✓ |  | ✓ |   |
| CASK                                | O14936 | ✓ |  | ✓ | ✓ |
| NAP1L1                              | P55209 | ✓ |  | ✓ | ✓ |
| NAP1L4                              | Q99733 | ✓ |  | ✓ | ✓ |
| MATN3                               | O15232 | ✓ |  |   |   |
| SLC44A1                             | Q8WWI5 | ✓ |  |   |   |
| PHGDH                               | O43175 | ✓ |  | ✓ |   |
| DSC3                                | Q14574 | ✓ |  | ✓ | ✓ |
| MSLN                                | Q13421 | ✓ |  |   |   |
| LUM                                 | P51884 | ✓ |  |   | ✓ |
| PPIE                                | Q9UNP9 | ✓ |  |   |   |
| PEPD                                | P12955 | ✓ |  |   |   |
| GSDMA                               | Q96QA5 | ✓ |  |   |   |
| KRT20                               | P35900 | ✓ |  | ✓ | ✓ |
| GGCT                                | O75223 | ✓ |  |   | ✓ |
| DIRAS2                              | Q96HU8 | ✓ |  | ✓ | ✓ |
| TFG                                 | Q92734 | ✓ |  | ✓ | ✓ |
| KIFBP                               | Q96EK5 | ✓ |  |   |   |
| SNX2                                | O60749 | ✓ |  | ✓ | ✓ |
| SNX1                                | Q13596 | ✓ |  | ✓ | ✓ |
| GSTM1                               | P09488 | ✓ |  |   |   |

|            |        |   |  |   |   |
|------------|--------|---|--|---|---|
| DBI        | P07108 | ✓ |  |   |   |
| PPP3CB     | P16298 | ✓ |  | ✓ | ✓ |
| HNRNP      | Q14103 | ✓ |  | ✓ | ✓ |
| POLE       | Q07864 | ✓ |  |   |   |
| JAG1       | P78504 | ✓ |  |   |   |
| SETSP      | P0DME0 | ✓ |  | ✓ | ✓ |
| MAPRE1     | Q15691 | ✓ |  | ✓ | ✓ |
| CP         | P00450 | ✓ |  |   |   |
| HEXB       | P07686 | ✓ |  | ✓ |   |
| NBEA       | Q8NFP9 | ✓ |  | ✓ | ✓ |
| STMN2      | Q93045 | ✓ |  |   | ✓ |
| MAP4       | P27816 | ✓ |  |   |   |
| UBE2V2     | Q15819 | ✓ |  | ✓ | ✓ |
| NIT2       | Q9NQR4 | ✓ |  | ✓ | ✓ |
| DMBT1      | Q9UGM3 | ✓ |  |   |   |
| ADRM1      | Q16186 | ✓ |  | ✓ | ✓ |
| SCGB2A1    | O75556 | ✓ |  |   | ✓ |
| ERVMER34-1 | Q9H9K5 | ✓ |  |   |   |
| GUCY1A2    | P33402 | ✓ |  |   |   |
| VPS28      | Q9UK41 | ✓ |  |   |   |
| GOLM1      | Q8NBJ4 | ✓ |  |   |   |
| GPM6A      | P51674 | ✓ |  |   |   |
| NFU1       | Q9UMS0 | ✓ |  |   | ✓ |
| COL14A1    | Q05707 | ✓ |  |   |   |
| ING5       | Q8WYH8 | ✓ |  |   | ✓ |
| ING4       | Q9UNL4 | ✓ |  |   | ✓ |
| SERPINB14  | P01012 | ✓ |  |   |   |
| PSAP       | P07602 | ✓ |  |   |   |
| CADM1      | Q9BY67 | ✓ |  |   |   |
| EVA1A      | Q9H8M9 | ✓ |  |   |   |
| TINAGL1    | Q9GZM7 | ✓ |  |   |   |
| GIT1       | Q9Y2X7 | ✓ |  |   |   |
| GIT2       | Q14161 | ✓ |  |   |   |
| KAT6B      | Q8WYB5 | ✓ |  |   |   |
| SEC23A     | Q15436 | ✓ |  |   |   |
| PCBD1      | P61457 | ✓ |  |   | ✓ |
| NRP1       | O14786 | ✓ |  |   |   |
| KCTD12     | Q96CX2 | ✓ |  |   |   |
| DYNC1I2    | Q13409 | ✓ |  | ✓ | ✓ |
| LZTFL1     | Q9NQ48 | ✓ |  |   |   |
| TSPAN14    | Q8NG11 | ✓ |  |   |   |
| QPCT       | Q16769 | ✓ |  |   |   |
| MMP9       | P14780 | ✓ |  |   |   |
| SERPINB4   | P48594 | ✓ |  |   |   |
| RAG1       | P15918 | ✓ |  |   | ✓ |



|                                        |        |   |   |   |   |
|----------------------------------------|--------|---|---|---|---|
| EML4                                   | Q9HC35 | ✓ |   | ✓ | ✓ |
| IGLC3                                  | P0DOY3 | ✓ |   |   |   |
| IGLC2                                  | P0DOY2 | ✓ |   |   |   |
| IGLC1                                  | P0CG04 | ✓ |   |   |   |
| Immunoglobulin<br>lambda-1 light chain | P0DOX8 | ✓ |   |   |   |
| IGLC6                                  | P0CF74 | ✓ |   |   |   |
| IGLL5                                  | B9A064 | ✓ |   |   |   |
| IGLC7                                  | A0M8Q6 | ✓ |   |   |   |
| TSPAN9                                 | O75954 | ✓ |   |   |   |
| EPHB2                                  | P29323 | ✓ |   |   |   |
| FBN2                                   | P35556 | ✓ |   |   |   |
| DYNC1H1                                | Q14204 |   | ✓ | ✓ | ✓ |
| PLEC                                   | Q15149 |   | ✓ | ✓ | ✓ |
| RAB8A                                  | P61006 |   | ✓ |   |   |
| FASN                                   | P49327 |   | ✓ | ✓ | ✓ |
| RAB10                                  | P61026 |   | ✓ |   |   |
| RAB8B                                  | Q92930 |   | ✓ |   |   |
| ATP6V1A                                | P38606 |   | ✓ |   |   |
| TLN1                                   | Q9Y490 |   | ✓ | ✓ |   |
| CUL4B                                  | Q13620 |   | ✓ |   |   |
| PSMD3                                  | O43242 |   | ✓ |   | ✓ |
| COL1A1                                 | P02452 |   | ✓ |   |   |
| RAB6A                                  | P20340 |   | ✓ |   |   |
| MYH9                                   | P35579 |   | ✓ | ✓ | ✓ |
| DIP2B                                  | Q9P265 |   | ✓ |   |   |
| ARF4                                   | P18085 |   | ✓ | ✓ |   |
| COL1A2                                 | P08123 |   | ✓ |   |   |
| COPB1                                  | P53618 |   | ✓ |   | ✓ |
| PSMD2                                  | Q13200 |   | ✓ |   |   |
| RAB6B                                  | Q9NRW1 |   | ✓ |   |   |
| GFPT1                                  | Q06210 |   | ✓ |   | ✓ |
| AP2B1                                  | P63010 |   | ✓ |   |   |
| RACK1                                  | P63244 |   | ✓ | ✓ | ✓ |
| TF                                     | Q29443 |   | ✓ |   |   |
| COL6A3                                 | P12111 |   | ✓ |   |   |
| SLC25A5                                | P05141 |   | ✓ |   |   |
| TKT                                    | P29401 |   | ✓ | ✓ | ✓ |
| GNAI1                                  | P63096 |   | ✓ |   |   |
| HSPD1                                  | P10809 |   | ✓ |   | ✓ |
| CKAP4                                  | Q07065 |   | ✓ |   |   |
| CADPS                                  | Q9ULU8 |   | ✓ |   |   |
| CSE1L                                  | P55060 |   | ✓ |   |   |
| GCN1                                   | Q92616 |   | ✓ |   |   |
| PFKL                                   | P17858 |   | ✓ |   |   |

|          |        |  |   |   |   |
|----------|--------|--|---|---|---|
| CCT3     | P49368 |  | ✓ |   |   |
| EIF4A3   | P38919 |  | ✓ |   |   |
| SLC25A6  | P12236 |  | ✓ |   |   |
| S100A16  | Q96FQ6 |  | ✓ |   |   |
| SEC31A   | O94979 |  | ✓ |   |   |
| ATP2A2   | P16615 |  | ✓ |   |   |
| AP1B1    | Q10567 |  | ✓ |   |   |
| CDCP1    | Q9H5V8 |  | ✓ |   |   |
| RAB13    | P51153 |  | ✓ |   |   |
| IQGAP1   | P46940 |  | ✓ | ✓ | ✓ |
| CCT4     | P50991 |  | ✓ | ✓ | ✓ |
| ATP6V1B2 | P21281 |  | ✓ | ✓ | ✓ |
| CTNND1   | O60716 |  | ✓ |   |   |
| ATP8A1   | Q9Y2Q0 |  | ✓ |   |   |
| RPN1     | P04843 |  | ✓ |   |   |
| EPRS1    | P07814 |  | ✓ |   |   |
| GANAB    | Q14697 |  | ✓ |   |   |
| ANXA11   | P50995 |  | ✓ |   |   |
| RPS9     | P46781 |  | ✓ |   |   |
| AP2M1    | Q96CW1 |  | ✓ |   |   |
| MYO1B    | O43795 |  | ✓ |   | ✓ |
| CCT8     | P50990 |  | ✓ | ✓ | ✓ |
| PSMC5    | P62195 |  | ✓ |   |   |
| COPB2    | P35606 |  | ✓ |   |   |
| SYT1     | P21579 |  | ✓ |   |   |
| RRAS     | P10301 |  | ✓ |   |   |
| ARPC1A   | Q92747 |  | ✓ |   |   |
| ARL8B    | Q9NVJ2 |  | ✓ |   |   |
| RPS4X    | P62701 |  | ✓ |   |   |
| CCT6A    | P40227 |  | ✓ | ✓ | ✓ |
| HRNR     | Q86YZ3 |  | ✓ |   |   |
| ACLY     | P53396 |  | ✓ |   |   |
| GNAQ     | P50148 |  | ✓ |   |   |
| SLC25A4  | P12235 |  | ✓ |   |   |
| MVP      | Q14764 |  | ✓ | ✓ |   |
| SRC      | P12931 |  | ✓ | ✓ |   |
| STXBP1   | P61764 |  | ✓ |   |   |
| MYOF     | Q9NZM1 |  | ✓ |   |   |
| NID2     | Q14112 |  | ✓ |   |   |
| DNM2     | P50570 |  | ✓ |   |   |
| PFKM     | P08237 |  | ✓ |   |   |
| UBR4     | Q5T4S7 |  | ✓ |   |   |
| AP2A1    | O95782 |  | ✓ |   |   |
| RPS2     | P15880 |  | ✓ |   |   |
| CCT7     | Q99832 |  | ✓ |   |   |

|         |        |  |   |   |   |
|---------|--------|--|---|---|---|
| RPL4    | P36578 |  | ✓ |   |   |
| MYO1C   | O00159 |  | ✓ |   |   |
| RALB    | P11234 |  | ✓ |   |   |
| MAPK1   | P28482 |  | ✓ |   |   |
| VAT1L   | Q9HCJ6 |  | ✓ |   |   |
| ACTR1A  | P61163 |  | ✓ |   |   |
| PPP2R1A | P30153 |  | ✓ |   |   |
| H3-3A   | P84243 |  | ✓ |   |   |
| H3-4    | Q16695 |  | ✓ |   |   |
| H3C1    | P68431 |  | ✓ |   |   |
| H3C15   | Q71DI3 |  | ✓ |   |   |
| HSPA9   | P38646 |  | ✓ | ✓ | ✓ |
| COL17A1 | Q9UMD9 |  | ✓ |   | ✓ |
| TAGLN2  | P37802 |  | ✓ | ✓ | ✓ |
| SYT5    | O00445 |  | ✓ |   | ✓ |
| FERMT1  | Q9BQL6 |  | ✓ |   |   |
| PLXNA1  | Q9UIW2 |  | ✓ |   |   |
| ARPC2   | O15144 |  | ✓ |   |   |
| PSMD1   | Q99460 |  | ✓ |   |   |
| PI4K2A  | Q9BTU6 |  | ✓ |   |   |
| PSMC4   | P43686 |  | ✓ |   |   |
| GNA11   | P29992 |  | ✓ |   |   |
| DDX39B  | Q13838 |  | ✓ |   |   |
| SEPTIN6 | Q14141 |  | ✓ |   |   |
| AHCYL1  | O43865 |  | ✓ |   |   |
| RAB33B  | Q9H082 |  | ✓ |   |   |
| CAD     | P27708 |  | ✓ | ✓ |   |
| PSMC1   | P62191 |  | ✓ | ✓ | ✓ |
| GARS1   | P41250 |  | ✓ |   | ✓ |
| SND1    | Q7KZF4 |  | ✓ |   | ✓ |
| AARS1   | P49588 |  | ✓ | ✓ |   |
| BAIAP2  | Q9UQB8 |  | ✓ |   |   |
| KPNB1   | Q14974 |  | ✓ |   |   |
| VDAC1   | P21796 |  | ✓ |   |   |
| SLC12A2 | P55011 |  | ✓ |   |   |
| USO1    | O60763 |  | ✓ |   |   |
| CYFIP1  | Q7L576 |  | ✓ |   |   |
| RPS18   | P62269 |  | ✓ |   |   |
| EIF3L   | Q9Y262 |  | ✓ |   |   |
| HNRNPM  | P52272 |  | ✓ |   |   |
| ATP9A   | O75110 |  | ✓ |   |   |
| STT3A   | P46977 |  | ✓ |   |   |
| COPG1   | Q9Y678 |  | ✓ |   |   |
| ACOT7   | O00154 |  | ✓ |   |   |
| XPO7    | Q9UIA9 |  | ✓ |   |   |

|          |        |  |   |   |   |
|----------|--------|--|---|---|---|
| PSMD13   | Q9UNM6 |  | ✓ |   |   |
| PCBP1    | Q15365 |  | ✓ |   |   |
| RALA     | P11233 |  | ✓ |   |   |
| TMED10   | P49755 |  | ✓ |   |   |
| AP1M1    | Q9BXS5 |  | ✓ |   |   |
| SEPTIN7  | Q16181 |  | ✓ |   |   |
| SEPTIN8  | Q92599 |  | ✓ |   |   |
| EIF3A    | Q14152 |  | ✓ |   |   |
| IARS1    | P41252 |  | ✓ |   |   |
| ARL8A    | Q96BM9 |  | ✓ |   |   |
| RAB4B    | P61018 |  | ✓ |   |   |
| ACTR2    | P61160 |  | ✓ |   | ✓ |
| H2BC15   | Q99877 |  | ✓ | ✓ | ✓ |
| H2BC5    | P58876 |  | ✓ | ✓ | ✓ |
| H2BC12   | O60814 |  | ✓ | ✓ | ✓ |
| H2BC14   | Q99879 |  | ✓ | ✓ | ✓ |
| H2BS1    | P57053 |  | ✓ | ✓ | ✓ |
| H2BC18   | Q5QNW6 |  | ✓ | ✓ | ✓ |
| H2BC4    | P62807 |  | ✓ | ✓ | ✓ |
| H2BC9    | Q93079 |  | ✓ | ✓ | ✓ |
| H2BC13   | Q99880 |  | ✓ | ✓ | ✓ |
| PDIA4    | P13667 |  | ✓ |   | ✓ |
| F11R     | Q9Y624 |  | ✓ | ✓ |   |
| ABCE1    | P61221 |  | ✓ | ✓ | ✓ |
| PSMD6    | Q15008 |  | ✓ |   |   |
| SNAP25   | P60880 |  | ✓ |   |   |
| FLOT2    | Q14254 |  | ✓ |   |   |
| HUWE1    | Q7Z6Z7 |  | ✓ |   |   |
| GLG1     | Q92896 |  | ✓ |   |   |
| MTHFD1   | P11586 |  | ✓ |   |   |
| ERLIN2   | O94905 |  | ✓ |   |   |
| ACTR3    | P61158 |  | ✓ |   |   |
| DNM1     | Q05193 |  | ✓ |   |   |
| RPL7     | P18124 |  | ✓ |   |   |
| G6PD     | P11413 |  | ✓ |   |   |
| DARS1    | P14868 |  | ✓ |   |   |
| TUFM     | P49411 |  | ✓ |   |   |
| SERPINH1 | P50454 |  | ✓ |   |   |
| FARSB    | Q9NSD9 |  | ✓ |   |   |
| AGL      | P35573 |  | ✓ |   |   |
| RAB27A   | P51159 |  | ✓ |   |   |
| YES1     | P07947 |  | ✓ |   |   |
| RAP2B    | P61225 |  | ✓ |   |   |
| CD109    | Q6YHK3 |  | ✓ |   |   |
| LTA4H    | P09960 |  | ✓ |   |   |

|          |        |  |   |   |   |
|----------|--------|--|---|---|---|
| RRAS2    | P62070 |  | ✓ |   |   |
| SAR1B    | Q9Y6B6 |  | ✓ |   |   |
| GOT2     | P00505 |  | ✓ |   |   |
| AP1M2    | Q9Y6Q5 |  | ✓ |   |   |
| YKT6     | O15498 |  | ✓ |   |   |
| ERP44    | Q9BS26 |  | ✓ |   |   |
| CCT5     | P48643 |  | ✓ |   |   |
| RPL13    | P26373 |  | ✓ |   |   |
| SRI      | P30626 |  | ✓ |   |   |
| HK1      | P19367 |  | ✓ |   |   |
| SEC61A1  | P61619 |  | ✓ |   |   |
| ACTR1B   | P42025 |  | ✓ |   |   |
| ELAPOR1  | Q6UXG2 |  | ✓ |   |   |
| SERPINB3 | P29508 |  | ✓ |   |   |
| SLC2A1   | P11166 |  | ✓ |   |   |
| CPE      | P16870 |  | ✓ |   |   |
| SLC38A5  | Q8WUX1 |  | ✓ |   |   |
| RAB43    | Q86YS6 |  | ✓ |   |   |
| RAB12    | Q6IQ22 |  | ✓ |   |   |
| RAB4A    | P20338 |  | ✓ |   |   |
| AVP      | P01185 |  | ✓ |   |   |
| MAT2A    | P31153 |  | ✓ | ✓ | ✓ |
| ACO2     | Q99798 |  | ✓ |   | ✓ |
| H2BC21   | Q16778 |  | ✓ | ✓ | ✓ |
| H2BC17   | P23527 |  | ✓ | ✓ | ✓ |
| H2BC3    | P33778 |  | ✓ | ✓ | ✓ |
| H2BC11   | P06899 |  | ✓ | ✓ | ✓ |
| H2BU1    | Q8N257 |  | ✓ | ✓ | ✓ |
| TMEM43   | Q9BTV4 |  | ✓ | ✓ |   |
| COL4A2   | P08572 |  | ✓ | ✓ | ✓ |
| MMP14    | P50281 |  | ✓ |   | ✓ |
| CD44     | P16070 |  | ✓ | ✓ |   |
| HNRNPU   | Q00839 |  | ✓ |   | ✓ |
| PA2G4    | Q9UQ80 |  | ✓ | ✓ |   |
| IDH2     | P48735 |  | ✓ |   |   |
| PHB      | P35232 |  | ✓ |   |   |
| DDX17    | Q92841 |  | ✓ |   |   |
| TFRC     | P02786 |  | ✓ |   |   |
| DHX9     | Q08211 |  | ✓ |   |   |
| PHB2     | Q99623 |  | ✓ |   |   |
| CACNA2D1 | P54289 |  | ✓ |   |   |
| ALDH18A1 | P54886 |  | ✓ |   |   |
| MAP4K4   | O95819 |  | ✓ |   |   |
| MLEC     | Q14165 |  | ✓ |   |   |
| CNP      | P09543 |  | ✓ |   |   |

|          |        |  |   |   |   |
|----------|--------|--|---|---|---|
| BUB3     | O43684 |  | ✓ |   |   |
| DDOST    | P39656 |  | ✓ |   |   |
| RPN2     | P04844 |  | ✓ |   |   |
| AP1G1    | O43747 |  | ✓ |   |   |
| AP2A2    | O94973 |  | ✓ |   |   |
| SAR1A    | Q9NR31 |  | ✓ |   |   |
| ERGIC1   | Q969X5 |  | ✓ |   |   |
| VPS29    | Q9UBQ0 |  | ✓ |   |   |
| COL6A2   | P12110 |  | ✓ |   |   |
| KLC1     | Q07866 |  | ✓ |   |   |
| RPL6     | Q02878 |  | ✓ |   |   |
| LANCL1   | O43813 |  | ✓ |   |   |
| PGRMC1   | O00264 |  | ✓ |   |   |
| RPL15    | P61313 |  | ✓ |   |   |
| KLC2     | Q9H0B6 |  | ✓ |   |   |
| TM9SF4   | Q92544 |  | ✓ |   |   |
| GNB3     | P16520 |  | ✓ |   |   |
| SLC25A31 | Q9H0C2 |  | ✓ |   |   |
| RTN1     | Q16799 |  | ✓ |   |   |
| ESD      | P10768 |  | ✓ |   |   |
| ATP1B3   | P54709 |  | ✓ |   | ✓ |
| QARS1    | P47897 |  | ✓ | ✓ | ✓ |
| HRAS     | P01112 |  | ✓ |   | ✓ |
| NRAS     | P01111 |  | ✓ |   | ✓ |
| RUVBL2   | Q9Y230 |  | ✓ | ✓ |   |
| PRMT1    | Q99873 |  | ✓ |   |   |
| RPS8     | P62241 |  | ✓ |   |   |
| VARS1    | P26640 |  | ✓ |   |   |
| ITGA1    | P56199 |  | ✓ |   |   |
| NCAM1    | P13591 |  | ✓ |   |   |
| SERPINE2 | P07093 |  | ✓ |   |   |
| CPNE1    | Q99829 |  | ✓ |   |   |
| TMED4    | Q7Z7H5 |  | ✓ |   |   |
| RARS1    | P54136 |  | ✓ |   |   |
| KIF5C    | O60282 |  | ✓ |   |   |
| COPS4    | Q9BT78 |  | ✓ |   |   |
| HSD17B4  | P51659 |  | ✓ |   |   |
| ETFB     | P38117 |  | ✓ |   |   |
| HPRT1    | P00492 |  | ✓ |   |   |
| PXDN     | Q92626 |  | ✓ |   |   |
| UPF1     | Q92900 |  | ✓ |   |   |
| ATP6AP2  | O75787 |  | ✓ |   |   |
| RAB18    | Q9NP72 |  | ✓ |   |   |
| DDX1     | Q92499 |  | ✓ |   |   |
| MINK1    | Q8N4C8 |  | ✓ |   |   |

|          |        |  |   |  |  |
|----------|--------|--|---|--|--|
| SRP68    | Q9UHB9 |  | ✓ |  |  |
| UBE2N    | P61088 |  | ✓ |  |  |
| CYB5R3   | P00387 |  | ✓ |  |  |
| CPD      | O75976 |  | ✓ |  |  |
| TM9SF2   | Q99805 |  | ✓ |  |  |
| SF3B1    | O75533 |  | ✓ |  |  |
| ARCN1    | P48444 |  | ✓ |  |  |
| TTYH3    | Q9C0H2 |  | ✓ |  |  |
| ATP6V0D1 | P61421 |  | ✓ |  |  |
| FLG      | P20930 |  | ✓ |  |  |
| SART3    | Q15020 |  | ✓ |  |  |
| ECPAS    | Q5VYK3 |  | ✓ |  |  |
| AP3B1    | O00203 |  | ✓ |  |  |
| SNRNP200 | O75643 |  | ✓ |  |  |
| RPS3A    | P61247 |  | ✓ |  |  |
| RPS6KA3  | P51812 |  | ✓ |  |  |
| RAB21    | Q9UL25 |  | ✓ |  |  |
| CSNK2A1  | P68400 |  | ✓ |  |  |
| CSNK2A3  | Q8NEV1 |  | ✓ |  |  |
| SRP54    | P61011 |  | ✓ |  |  |
| CYFIP2   | Q96F07 |  | ✓ |  |  |
| RPS15A   | P62244 |  | ✓ |  |  |
| VPS13C   | Q709C8 |  | ✓ |  |  |
| RPL5     | P46777 |  | ✓ |  |  |
| USP5     | P45974 |  | ✓ |  |  |
| RPS11    | P62280 |  | ✓ |  |  |
| PRKACA   | P17612 |  | ✓ |  |  |
| CAB39    | Q9Y376 |  | ✓ |  |  |
| AP3B2    | Q13367 |  | ✓ |  |  |
| RPL10A   | P62906 |  | ✓ |  |  |
| SHMT2    | P34897 |  | ✓ |  |  |
| OXCT1    | P55809 |  | ✓ |  |  |
| PTPRN    | Q16849 |  | ✓ |  |  |
| PTPN9    | P43378 |  | ✓ |  |  |
| SYP      | P08247 |  | ✓ |  |  |
| STX4     | Q12846 |  | ✓ |  |  |
| GNA14    | O95837 |  | ✓ |  |  |
| RPS14    | P62263 |  | ✓ |  |  |
| SCARB1   | Q8WTV0 |  | ✓ |  |  |
| RPL3     | P39023 |  | ✓ |  |  |
| SLC29A1  | Q99808 |  | ✓ |  |  |
| ARL1     | P40616 |  | ✓ |  |  |
| MAP2K2   | P36507 |  | ✓ |  |  |
| S100A11  | P31949 |  | ✓ |  |  |
| ADH5     | P11766 |  | ✓ |  |  |

|          |        |  |   |   |   |
|----------|--------|--|---|---|---|
| HACD3    | Q9P035 |  | ✓ |   |   |
| RPL13AP3 | Q6NVV1 |  | ✓ |   |   |
| RPL13A   | P40429 |  | ✓ |   |   |
| GNG5     | P63218 |  | ✓ |   |   |
| HM13     | Q8TCT9 |  | ✓ |   |   |
| RPL23    | P62829 |  | ✓ |   |   |
| RTN3     | O95197 |  | ✓ |   |   |
| RHOC     | P08134 |  | ✓ |   |   |
| RHOA     | P61586 |  | ✓ |   |   |
| CCT2     | P78371 |  | ✓ | ✓ | ✓ |
| RPLP0    | P05388 |  | ✓ | ✓ | ✓ |
| IDH1     | O75874 |  | ✓ | ✓ | ✓ |
| RPL7A    | P62424 |  | ✓ |   | ✓ |
| ARPC4    | P59998 |  | ✓ | ✓ | ✓ |
| H2AZ1    | P0C0S5 |  | ✓ |   | ✓ |
| H2AZ2    | Q71UI9 |  | ✓ |   | ✓ |
| RPS25    | P62851 |  | ✓ | ✓ | ✓ |
| EIF3E    | P60228 |  | ✓ | ✓ | ✓ |
| IDH3A    | P50213 |  | ✓ |   |   |
| MDH2     | P40926 |  | ✓ |   |   |
| APMAP    | Q9HDC9 |  | ✓ |   |   |
| GIPC1    | O14908 |  | ✓ |   |   |
| HSPH1    | Q92598 |  | ✓ |   |   |
| EPB41L2  | O43491 |  | ✓ |   |   |
| PSMD12   | O00232 |  | ✓ |   |   |
| ARF6     | P62330 |  | ✓ |   |   |
| GMPS     | P49915 |  | ✓ |   |   |
| SARS1    | P49591 |  | ✓ |   |   |
| VDAC2    | P45880 |  | ✓ |   |   |
| HADHB    | P55084 |  | ✓ |   |   |
| PSME1    | Q06323 |  | ✓ |   |   |
| ERLIN1   | O75477 |  | ✓ |   |   |
| FLG2     | Q5D862 |  | ✓ |   |   |
| CYRIB    | Q9NUQ9 |  | ✓ |   |   |
| WASHC5   | Q12768 |  | ✓ |   |   |
| CTBP1    | Q13363 |  | ✓ |   |   |
| DDX5     | P17844 |  | ✓ |   |   |
| PTPN23   | Q9H3S7 |  | ✓ |   |   |
| PTK7     | Q13308 |  | ✓ |   |   |
| MARCKSL1 | P49006 |  | ✓ |   |   |
| IDH3B    | O43837 |  | ✓ |   |   |
| STRAP    | Q9Y3F4 |  | ✓ |   |   |
| CAMK2B   | Q13554 |  | ✓ |   |   |
| CAMK2D   | Q13557 |  | ✓ |   |   |
| CNN1     | P51911 |  | ✓ |   |   |



|         |        |  |   |   |  |
|---------|--------|--|---|---|--|
| MYH10   | P35580 |  | ✓ |   |  |
| SACM1L  | Q9NTJ5 |  | ✓ |   |  |
| CDH1    | P12830 |  | ✓ |   |  |
| LAP3    | P28838 |  | ✓ |   |  |
| CMA5    | Q8NFW8 |  | ✓ |   |  |
| HSPA13  | P48723 |  | ✓ |   |  |
| KIF1A   | Q12756 |  | ✓ |   |  |
| DLG1    | Q12959 |  | ✓ |   |  |
| PSMD5   | Q16401 |  | ✓ |   |  |
| HNRNPA1 | P09651 |  | ✓ |   |  |
| CAPN1   | P07384 |  | ✓ |   |  |
| STXBP3  | O00186 |  | ✓ |   |  |
| DCTN1   | Q14203 |  | ✓ |   |  |
| VAMP7   | P51809 |  | ✓ |   |  |
| MYO1D   | O94832 |  | ✓ |   |  |
| DRG2    | P55039 |  | ✓ |   |  |
| TTLL12  | Q14166 |  | ✓ |   |  |
| PCBP2   | Q15366 |  | ✓ |   |  |
| CUL3    | Q13618 |  | ✓ |   |  |
| GBE1    | Q04446 |  | ✓ |   |  |
| PSMD8   | P48556 |  | ✓ |   |  |
| IPO5    | O00410 |  | ✓ |   |  |
| RHEB    | Q15382 |  | ✓ |   |  |
| GALE    | Q14376 |  | ✓ |   |  |
| SPCS2   | Q15005 |  | ✓ |   |  |
| RPL26   | P61254 |  | ✓ |   |  |
| RPL26L1 | Q9UNX3 |  | ✓ |   |  |
| ARPC3   | O15145 |  | ✓ |   |  |
| CDC42   | P60953 |  | ✓ |   |  |
| RHOG    | P84095 |  | ✓ |   |  |
| POMC    | P01189 |  | ✓ |   |  |
| TM9SF3  | Q9HD45 |  | ✓ |   |  |
| EPHB4   | P54760 |  | ✓ |   |  |
| VPS37B  | Q9H9H4 |  | ✓ |   |  |
| PSMD14  | O00487 |  | ✓ |   |  |
| SEPTIN5 | Q99719 |  | ✓ |   |  |
| AKR1B1  | P15121 |  | ✓ |   |  |
| PRPS1   | P60891 |  | ✓ |   |  |
| PNP     | P00491 |  | ✓ |   |  |
| CRYM    | Q14894 |  | ✓ |   |  |
| S100A6  | P06703 |  | ✓ |   |  |
| VAMP1   | P23763 |  | ✓ |   |  |
| ALDH1L1 | O75891 |  | ✓ |   |  |
| ALDH1L2 | Q3SY69 |  | ✓ |   |  |
| MYL12B  | O14950 |  | ✓ | ✓ |  |

|          |        |  |   |   |   |
|----------|--------|--|---|---|---|
| MYL12A   | P19105 |  | ✓ | ✓ |   |
| CAP1     | Q01518 |  | ✓ | ✓ | ✓ |
| LAMP1    | P11279 |  | ✓ | ✓ | ✓ |
| RBBP4    | Q09028 |  | ✓ |   | ✓ |
| PRPF19   | Q9UMS4 |  | ✓ |   | ✓ |
| S100A10  | P60903 |  | ✓ | ✓ |   |
| SLC6A8   | P48029 |  | ✓ | ✓ | ✓ |
| FDPS     | P14324 |  | ✓ | ✓ | ✓ |
| COPS2    | P61201 |  | ✓ | ✓ | ✓ |
| FERMT2   | Q96AC1 |  | ✓ |   |   |
| PBXIP1   | Q96AQ6 |  | ✓ |   |   |
| DYNC1LI1 | Q9Y6G9 |  | ✓ |   |   |
| STX1B    | P61266 |  | ✓ |   |   |
| SYNGR1   | O43759 |  | ✓ |   |   |
| RPL24    | P83731 |  | ✓ |   |   |
| ASNS     | P08243 |  | ✓ |   |   |
| PACSIN2  | Q9UNF0 |  | ✓ |   |   |
| NAPA     | P54920 |  | ✓ |   |   |
| LLGL1    | Q15334 |  | ✓ |   |   |
| OGDH     | Q02218 |  | ✓ |   |   |
| CTBP2    | P56545 |  | ✓ |   |   |
| NCKAP1   | Q9Y2A7 |  | ✓ |   |   |
| ASL      | P04424 |  | ✓ |   |   |
| PPP2R2A  | P63151 |  | ✓ |   |   |
| RPL27    | P61353 |  | ✓ |   |   |
| RAB3GAP2 | Q9H2M9 |  | ✓ |   |   |
| RPS24    | P62847 |  | ✓ |   |   |
| PACSIN3  | Q9UKS6 |  | ✓ |   |   |
| RAP2C    | Q9Y3L5 |  | ✓ |   |   |
| ATP6V1C1 | P21283 |  | ✓ |   |   |
| SEZ6L2   | Q6UXD5 |  | ✓ |   |   |
| SNAP23   | O00161 |  | ✓ |   |   |
| CAPNS1   | P04632 |  | ✓ |   |   |
| DHX15    | O43143 |  | ✓ |   |   |
| HARS1    | P12081 |  | ✓ |   |   |
| TM9SF1   | O15321 |  | ✓ |   |   |
| TBC1D8B  | Q0IIM8 |  | ✓ |   |   |
| PGLS     | O95336 |  | ✓ |   |   |
| MAPRE3   | Q9UPY8 |  | ✓ |   |   |
| NANS     | Q9NR45 |  | ✓ |   |   |
| GPS1     | Q13098 |  | ✓ |   |   |
| COPS3    | Q9UNS2 |  | ✓ |   |   |
| SLC38A1  | Q9H2H9 |  | ✓ |   |   |
| KLC4     | Q9NSK0 |  | ✓ |   |   |
| PARVA    | Q9NVD7 |  | ✓ |   |   |

|          |        |  |   |  |  |
|----------|--------|--|---|--|--|
| PTPA     | Q15257 |  | ✓ |  |  |
| ATP6V1H  | Q9UI12 |  | ✓ |  |  |
| NIBAN2   | Q96TA1 |  | ✓ |  |  |
| MOB1B    | Q7L9L4 |  | ✓ |  |  |
| MOB1A    | Q9H8S9 |  | ✓ |  |  |
| PRPF8    | Q6P2Q9 |  | ✓ |  |  |
| PDIA6    | Q15084 |  | ✓ |  |  |
| SRPRB    | Q9Y5M8 |  | ✓ |  |  |
| PAICS    | P22234 |  | ✓ |  |  |
| MAP2K1   | Q02750 |  | ✓ |  |  |
| PPP2CB   | P62714 |  | ✓ |  |  |
| PPP2CA   | P67775 |  | ✓ |  |  |
| BPNT1    | O95861 |  | ✓ |  |  |
| KRAS     | P01116 |  | ✓ |  |  |
| RRAGB    | Q5VZM2 |  | ✓ |  |  |
| RRAGA    | Q7L523 |  | ✓ |  |  |
| RPL28    | P46779 |  | ✓ |  |  |
| SRP72    | O76094 |  | ✓ |  |  |
| RPS6     | P62753 |  | ✓ |  |  |
| COG4     | Q9H9E3 |  | ✓ |  |  |
| ARL3     | P36405 |  | ✓ |  |  |
| LIN7C    | Q9NUP9 |  | ✓ |  |  |
| PDXP     | Q96GD0 |  | ✓ |  |  |
| COG5     | Q9UP83 |  | ✓ |  |  |
| RPS13    | P62277 |  | ✓ |  |  |
| ACADS    | P16219 |  | ✓ |  |  |
| LMAN2    | Q12907 |  | ✓ |  |  |
| PRMT5    | O14744 |  | ✓ |  |  |
| EFTUD2   | Q15029 |  | ✓ |  |  |
| LASP1    | Q14847 |  | ✓ |  |  |
| SFRP1    | Q8N474 |  | ✓ |  |  |
| OLA1     | Q9NTK5 |  | ✓ |  |  |
| EPHX1    | P07099 |  | ✓ |  |  |
| RPS20    | P60866 |  | ✓ |  |  |
| MON2     | Q7Z3U7 |  | ✓ |  |  |
| COPZ1    | P61923 |  | ✓ |  |  |
| CUL1     | Q13616 |  | ✓ |  |  |
| CDK1     | P06493 |  | ✓ |  |  |
| PLOD3    | O60568 |  | ✓ |  |  |
| DNM1L    | O00429 |  | ✓ |  |  |
| SUCLA2   | Q9P2R7 |  | ✓ |  |  |
| ARL6IP5  | O75915 |  | ✓ |  |  |
| EIF3B    | P55884 |  | ✓ |  |  |
| RAB3GAP1 | Q15042 |  | ✓ |  |  |
| FGB      | P02675 |  | ✓ |  |  |

|          |        |  |   |   |   |
|----------|--------|--|---|---|---|
| RPL27A   | P46776 |  | ✓ |   |   |
| ATP5PO   | P48047 |  | ✓ |   |   |
| GOLGA7   | Q7Z5G4 |  | ✓ |   |   |
| CHMP2A   | O43633 |  | ✓ |   |   |
| RPL10    | P27635 |  | ✓ |   |   |
| VAMP8    | Q9BV40 |  | ✓ |   |   |
| GBF1     | Q92538 |  | ✓ |   |   |
| ATL3     | Q6DD88 |  | ✓ |   |   |
| RAB25    | P57735 |  | ✓ |   |   |
| PPP3CC   | P48454 |  | ✓ |   |   |
| PCK2     | Q16822 |  | ✓ |   |   |
| ago-01   | Q9UL18 |  | ✓ |   |   |
| KARS1    | Q15046 |  | ✓ |   |   |
| RAB22A   | Q9UL26 |  | ✓ |   |   |
| SURF4    | O15260 |  | ✓ |   |   |
| ACADVL   | P49748 |  | ✓ |   |   |
| MMS19    | Q96T76 |  | ✓ |   |   |
| LYN      | P07948 |  | ✓ |   |   |
| HCK      | P08631 |  | ✓ |   |   |
| CLINT1   | Q14677 |  | ✓ |   |   |
| SEC11A   | P67812 |  | ✓ |   |   |
| IFIT3    | O14879 |  |   | ✓ | ✓ |
| DYNLRB1  | Q9NP97 |  |   | ✓ | ✓ |
| DYNLRB2  | Q8TF09 |  |   | ✓ | ✓ |
| CLTCL1   | P53675 |  |   | ✓ | ✓ |
| GLRX3    | O76003 |  |   | ✓ | ✓ |
| SERPINA3 | P01011 |  |   | ✓ | ✓ |
| SDF4     | Q9BRK5 |  |   | ✓ | ✓ |
| NACA     | E9PAV3 |  |   | ✓ | ✓ |
| ATP2B2   | Q01814 |  |   | ✓ | ✓ |
| NACA     | Q13765 |  |   | ✓ | ✓ |
| RPLPOP6  | Q8NHW5 |  |   | ✓ | ✓ |
| RPS28    | P62857 |  |   | ✓ | ✓ |
| MPST     | P25325 |  |   | ✓ | ✓ |
| HNRNPR   | O43390 |  |   | ✓ | ✓ |
| SYNCRIP  | O60506 |  |   | ✓ | ✓ |
| CBX3     | Q13185 |  |   | ✓ | ✓ |
| ADAMTS18 | Q8TE60 |  |   | ✓ | ✓ |
| MESD     | Q14696 |  |   | ✓ | ✓ |
| PABPC1   | P11940 |  |   | ✓ | ✓ |
| PABPC3   | Q9H361 |  |   | ✓ | ✓ |
| EEF1E1   | O43324 |  |   | ✓ | ✓ |
| MGAT1    | P26572 |  |   | ✓ | ✓ |
| GSS      | P48637 |  |   | ✓ | ✓ |
| PSMB8    | P28062 |  |   | ✓ | ✓ |

|          |        |  |  |   |   |
|----------|--------|--|--|---|---|
| RPL22    | P35268 |  |  | ✓ | ✓ |
| IFITM2   | Q01629 |  |  | ✓ | ✓ |
| IFITM1   | P13164 |  |  | ✓ | ✓ |
| IFITM3   | Q01628 |  |  | ✓ | ✓ |
| TOLLIP   | Q9H0E2 |  |  | ✓ | ✓ |
| HMGB3    | O15347 |  |  | ✓ |   |
| ALDH1A3  | P47895 |  |  | ✓ |   |
| CPNE5    | Q9HCH3 |  |  | ✓ |   |
| CPNE8    | Q86YQ8 |  |  | ✓ |   |
| CPNE2    | Q96FN4 |  |  | ✓ |   |
| CPNE7    | Q9UBL6 |  |  | ✓ |   |
| CPNE4    | Q96A23 |  |  | ✓ |   |
| CPNE6    | O95741 |  |  | ✓ |   |
| CPNE9    | Q8IYJ1 |  |  | ✓ |   |
| RNH1     | P13489 |  |  | ✓ |   |
| PDCD5    | O14737 |  |  | ✓ |   |
| PPP4R2   | Q9NY27 |  |  | ✓ |   |
| ZC3H14   | Q6PJT7 |  |  | ✓ |   |
| RUVBL1   | Q9Y265 |  |  | ✓ |   |
| CKMT1A   | P12532 |  |  | ✓ |   |
| PFDN2    | Q9UHV9 |  |  | ✓ |   |
| ARPC5L   | Q9BPX5 |  |  | ✓ |   |
| XRCC6    | P12956 |  |  | ✓ |   |
| LGALS3   | P17931 |  |  | ✓ |   |
| CMPK1    | P30085 |  |  | ✓ |   |
| TLR2     | O60603 |  |  | ✓ |   |
| PAFAH1B3 | Q15102 |  |  | ✓ |   |
| CD276    | Q5ZPR3 |  |  | ✓ |   |
| CNDP2    | Q96KP4 |  |  | ✓ |   |
| HMGCS1   | Q01581 |  |  | ✓ |   |
| NDRG1    | Q92597 |  |  | ✓ |   |
| THOP1    | P52888 |  |  | ✓ |   |
| VASP     | P50552 |  |  | ✓ |   |
| DDX6     | P26196 |  |  | ✓ |   |
| RRN3P2   | A6NIE6 |  |  | ✓ |   |
| EIF2S2   | P20042 |  |  | ✓ |   |
| NMT1     | P30419 |  |  | ✓ |   |
| SYNE2    | Q8WXH0 |  |  | ✓ |   |
| NIN      | Q8N4C6 |  |  | ✓ |   |
| KRT82    | Q9NSB4 |  |  |   | ✓ |
| FLNC     | Q14315 |  |  |   | ✓ |
| VPS26A   | O75436 |  |  |   | ✓ |
| CDV3     | Q9UKY7 |  |  |   | ✓ |
| CBR3     | O75828 |  |  |   | ✓ |
| TAB2     | Q9NYJ8 |  |  |   | ✓ |

|         |        |  |  |  |   |
|---------|--------|--|--|--|---|
| CBR1    | P16152 |  |  |  | ✓ |
| C1QBP   | Q07021 |  |  |  | ✓ |
| SNRPD3  | P62318 |  |  |  | ✓ |
| EIF2S3B | Q2VIR3 |  |  |  | ✓ |
| RPS5    | P46782 |  |  |  | ✓ |
| RAD23B  | P54727 |  |  |  | ✓ |
| RTN4    | Q9NQC3 |  |  |  | ✓ |
| EIF3K   | Q9UBQ5 |  |  |  | ✓ |
| AHNAK2  | Q8IVF2 |  |  |  | ✓ |
| HOOK2   | Q96ED9 |  |  |  | ✓ |
| CRYAB   | P02511 |  |  |  | ✓ |
| RNPEP   | Q9H4A4 |  |  |  | ✓ |
| CENPF   | P49454 |  |  |  | ✓ |
| CORO1C  | Q9ULV4 |  |  |  | ✓ |
| LARGE1  | O95461 |  |  |  | ✓ |
| TMSB10  | P63313 |  |  |  | ✓ |
| ELAVL1  | Q15717 |  |  |  | ✓ |
| H2AC21  | Q8IUE6 |  |  |  | ✓ |
| H2AC7   | P20671 |  |  |  | ✓ |
| H2AC6   | Q93077 |  |  |  | ✓ |
| H2AC20  | Q16777 |  |  |  | ✓ |
| H2AC11  | P0C0S8 |  |  |  | ✓ |
| H2AJ    | Q9BTM1 |  |  |  | ✓ |
| H2AW    | Q7L7L0 |  |  |  | ✓ |
| H2AC18  | Q6FI13 |  |  |  | ✓ |
| H2AC14  | Q99878 |  |  |  | ✓ |
| H2AC12  | Q96KK5 |  |  |  | ✓ |
| H2AX    | P16104 |  |  |  | ✓ |
| H2AC4   | P04908 |  |  |  | ✓ |
| H2AC1   | Q96QV6 |  |  |  | ✓ |
| NPC1    | O15118 |  |  |  | ✓ |
| BCAS2   | O75934 |  |  |  | ✓ |
| MIF     | P14174 |  |  |  | ✓ |
| FARSA   | Q9Y285 |  |  |  | ✓ |

**Supplementary Table S2.** Determination of the presence of the 40 main proteins most frequently identified in exosomes ([http://exocarta.org/exosome\\_markers\\_new](http://exocarta.org/exosome_markers_new)) in exosomes isolated from NuLi - and CuFi corneal stromal cell lines

|    |          |   |
|----|----------|---|
| 1  | CD9      |   |
| 2  | HSPA8    | ✓ |
| 3  | PDCD6IP  | ✓ |
| 4  | GAPDH    | ✓ |
| 5  | ACTB     | ✓ |
| 6  | ANXA2    | ✓ |
| 7  | CD63     |   |
| 8  | SDCBP    |   |
| 9  | ENO1     | ✓ |
| 10 | HSP90AA1 | ✓ |
| 11 | TSG101   |   |
| 12 | PKM      | ✓ |
| 13 | LDHA     | ✓ |
| 14 | EEF1A1   | ✓ |
| 15 | YWHAZ    | ✓ |
| 16 | PGK1     | ✓ |
| 17 | EEF2     | ✓ |
| 18 | ALDOA    | ✓ |
| 19 | HSP90AB1 | ✓ |
| 20 | ANXA5    | ✓ |
| 21 | FASN     |   |
| 22 | YWHAE    | ✓ |
| 23 | CLTC     | ✓ |
| 24 | CD81     |   |
| 25 | ALB      | ✓ |
| 26 | VCP      | ✓ |
| 27 | TPI1     |   |
| 28 | PPIA     |   |
| 29 | MSN      | ✓ |
| 30 | CFL1     | ✓ |
| 31 | PRDX1    | ✓ |
| 32 | PFN1     |   |
| 33 | RAP1B    |   |
| 34 | ITGB1    | ✓ |
| 35 | HSPA5    | ✓ |
| 36 | SLC3A2   | ✓ |
| 37 | HIST1H4A |   |
| 38 | GNB2     |   |
| 39 | ATP1A1   | ✓ |
| 40 | YWHAQ    | ✓ |

**Supplementary Table S3.** List of putative exosomal biomarkers detected in exosomes isolated from NuLi and CuFi cell lines cultured in isolation or in contact with *P. aeruginosa* included in classes I to IV

|                  | NuLi              | NuLi + <i>P.<br/>aeruginosa</i> | CuFi  | CuFi + <i>P.<br/>aeruginosa</i> |
|------------------|-------------------|---------------------------------|-------|---------------------------------|
| <b>Class I</b>   |                   |                                 |       |                                 |
| SDCBP            | 7,90 <sup>1</sup> | 9,77                            | 4,44  | 9,72                            |
| <b>Class II</b>  |                   |                                 |       |                                 |
| SLC1A5           | 4,51              |                                 | 8,25  | 2,43                            |
| SLC3A2           | 27,07             | 32,12                           | 31,10 | 29,18                           |
| GNB1             | 3,38              | 2,79                            | 11,42 | 2,43                            |
| CLTC             | 4,51              | 12,57                           | 52,68 | 8,51                            |
| <b>Class III</b> |                   |                                 |       |                                 |
| CD47             | 2,25              | 4,19                            | 3,17  |                                 |
| GNB2             | 3,38              | 2,79                            | 11,42 | 2,43                            |
| ITGB1            | 33,84             | 20,95                           | 26,02 | 27,96                           |
| BSG              | 20,30             | 33,52                           | 10,79 | 29,18                           |
| B2M              |                   |                                 |       |                                 |
| <b>Class IV</b>  |                   |                                 |       |                                 |
| ATP1A1           | 22,56             | 36,31                           | 38,71 | 37,69                           |
| RAP1B            | 6,76              | 9,77                            | 6,34  | 6,08                            |
| GNAI3            | 2,25              | 1,39                            | 10,79 | 1,21                            |

<sup>1</sup>Normalized  
PSMs



**Supplementary Table S4.** List of proteins identified by LC-MS/MS in exosomes represented by at least 10 PSMs

| Protein symbol | Uniprot Entry | Normalized PSMs |                             |        |                             |
|----------------|---------------|-----------------|-----------------------------|--------|-----------------------------|
|                |               | NuLi            | NuLi + <i>P. aeruginosa</i> | CuFi   | CuFi + <i>P. aeruginosa</i> |
| FN1            | P02751        | 382,50          | 282,14                      | 125,68 | 207,94                      |
| TF             | P02787        | 330,60          | 127,10                      | 10,79  | 178,76                      |
| HPX            | P02790        | 244,85          | 94,98                       | 34,28  | 164,16                      |
| THBS1          | P07996        | 196,33          | 86,60                       | 61,57  | 86,34                       |
| KRT10          | P13645        | 152,32          | 196,94                      | 95,85  | 200,64                      |
| ALB            | P02769        | 138,78          | 215,10                      | 39,35  | 94,85                       |
| ACTG1          | P63261        | 72,21           | 76,82                       | 83,15  | 79,04                       |
| ACTB           | P60709        | 71,08           | 78,22                       | 83,15  | 85,12                       |
| KRT14          | P02533        | 66,57           | 114,53                      | 63,47  | 103,36                      |
| ACTA1          | P68133        | 65,44           | 67,04                       | 0,00   | 68,10                       |
| ACTA2          | P62736        | 65,44           | 67,04                       | 0,00   | 68,10                       |
| ACTC1          | P68032        | 65,44           | 67,04                       | 65,38  | 68,10                       |
| AGRN           | O00468        | 64,31           | 16,76                       | 12,06  | 21,89                       |
| ACTG2          | P63267        | 60,93           | 64,25                       | 0,00   | 64,45                       |
| LAMC1          | P11047        | 56,42           | 9,78                        | 8,25   | 23,10                       |
| KRT77          | Q7Z794        | 55,29           | 71,23                       | 22,22  | 77,83                       |
| KRT15          | O77727        | 54,16           | 86,60                       | 0,00   | 85,12                       |
| HBB            | P68871        | 53,03           | 29,33                       | 13,33  | 23,10                       |
| HBG2           | P69892        | 47,39           | 29,33                       | 13,96  | 20,67                       |
| HBD            | P02042        | 47,39           | 29,33                       | 0,00   | 20,67                       |
| HBE1           | P02100        | 47,39           | 29,33                       | 13,96  | 20,67                       |
| HBG1           | P69891        | 47,39           | 29,33                       | 13,96  | 20,67                       |
| HSPA8          | P11142        | 46,26           | 32,13                       | 34,91  | 25,54                       |
| LAMA3          | Q16787        | 46,26           | 9,78                        | 17,77  | 14,59                       |
| LAMA5          | O15230        | 45,13           | 1,40                        | 28,56  | 9,73                        |

|                 |        |       |       |       |       |
|-----------------|--------|-------|-------|-------|-------|
| <b>HBA1</b>     | P69905 | 44,00 | 18,16 | 20,95 | 29,18 |
| <b>LAMC2</b>    | Q13753 | 41,75 | 19,55 | 26,02 | 25,54 |
| <b>HSPA5</b>    | P11021 | 40,62 | 27,94 | 38,72 | 29,18 |
| <b>KRT19</b>    | P08727 | 39,49 | 62,85 | 32,37 | 51,07 |
| <b>PDCD6IP</b>  | Q8WUM4 | 37,23 | 29,33 | 32,37 | 35,26 |
| <b>ANXA2</b>    | P07355 | 37,23 | 89,39 | 34,28 | 72,96 |
| <b>ALB</b>      | P02768 | 37,23 | 72,63 | 14,60 | 43,78 |
| <b>LGALS3BP</b> | Q08380 | 37,23 | 33,52 | 3,17  | 41,34 |
| <b>TGFB1</b>    | Q15582 | 36,11 | 13,97 | 22,22 | 20,67 |
| <b>ITGB1</b>    | P05556 | 33,85 | 20,95 | 26,02 | 27,97 |
| <b>LAMB1</b>    | P07942 | 33,85 | 5,59  | 11,43 | 20,67 |
| <b>YWHAE</b>    | P62258 | 29,34 | 18,16 | 22,85 | 19,46 |
| <b>ACTBL2</b>   | Q562R1 | 28,21 | 26,54 | 28,56 | 25,54 |
| <b>PRDX1</b>    | Q06830 | 28,21 | 32,13 | 12,69 | 23,10 |
| <b>VIM</b>      | P08670 | 28,21 | 34,92 | 15,87 | 27,97 |
| <b>SLC3A2</b>   | P08195 | 27,08 | 32,13 | 31,10 | 29,18 |
| <b>PSMA7</b>    | O14818 | 25,95 | 19,55 | 4,44  | 18,24 |
| <b>PKM</b>      | P14618 | 25,95 | 40,51 | 19,04 | 36,48 |
| <b>HSP90AB1</b> | P08238 | 24,82 | 41,90 | 31,74 | 30,40 |
| <b>PTGFRN</b>   | Q9P2B2 | 24,82 | 1,40  | 21,58 | 1,22  |
| <b>HSP90AA1</b> | P07900 | 24,82 | 30,73 | 36,18 | 24,32 |
| <b>THBS2</b>    | P35442 | 24,82 | 2,79  | 0,00  | 1,22  |
| <b>ITIH4</b>    | Q14624 | 24,82 | 0,00  | 4,44  | 6,08  |
| <b>HSPA2</b>    | P54652 | 23,69 | 15,36 | 15,23 | 15,81 |
| <b>ATP1A1</b>   | P05023 | 22,57 | 36,32 | 38,72 | 37,70 |
| <b>DPYSL2</b>   | Q16555 | 22,57 | 12,57 | 11,43 | 24,32 |
| <b>ACTN1</b>    | P12814 | 21,44 | 26,54 | 11,43 | 25,54 |
| <b>TAGLN</b>    | Q01995 | 21,44 | 1,40  | 8,89  | 2,43  |
| <b>PRDX4</b>    | Q13162 | 21,44 | 18,16 | 6,35  | 14,59 |
| <b>POTEE</b>    | Q6S8J3 | 21,44 | 34,92 | 30,47 | 29,18 |

|                                    |        |       |       |       |       |
|------------------------------------|--------|-------|-------|-------|-------|
| POTEF                              | A5A3E0 | 21,44 | 34,92 | 0,00  | 29,18 |
| YWHAZ                              | P63104 | 21,44 | 11,17 | 18,41 | 17,02 |
| VCAN                               | P13611 | 20,31 | 2,79  | 0,00  | 15,81 |
| ACTN4                              | O43707 | 20,31 | 26,54 | 12,06 | 26,75 |
| ANXA2P2                            | A6NMY6 | 20,31 | 55,87 | 0,00  | 43,78 |
| BSG                                | P35613 | 20,31 | 33,52 | 10,79 | 29,18 |
| DSP                                | P15924 | 19,18 | 30,73 | 34,28 | 36,48 |
| YWHAH                              | Q04917 | 19,18 | 13,97 | 17,14 | 12,16 |
| POTEKP                             | Q9BYX7 | 19,18 | 26,54 | 0,00  | 21,89 |
| Immunoglobulin gamma-1 heavy chain | P0DOX5 | 19,18 | 2,79  | 2,54  | 15,81 |
| YWHAG                              | P61981 | 19,18 | 15,36 | 15,87 | 14,59 |
| SFN                                | P31947 | 19,18 | 12,57 | 20,31 | 12,16 |
| IGHG1                              | P01857 | 19,18 | 2,79  | 2,54  | 15,81 |
| HSPA1B                             | P0DMV9 | 18,05 | 12,57 | 13,96 | 13,38 |
| TUBA1B                             | P68363 | 18,05 | 26,54 | 30,47 | 17,02 |
| TUBA1A                             | Q71U36 | 18,05 | 26,54 | 0,00  | 17,02 |
| PSMA6                              | P60900 | 18,05 | 9,78  | 4,44  | 10,94 |
| COL7A1                             | Q02388 | 18,05 | 5,59  | 5,71  | 0,00  |
| YWHAB                              | P31946 | 18,05 | 9,78  | 19,04 | 13,38 |
| ITGA3                              | P26006 | 18,05 | 12,57 | 19,04 | 10,94 |
| TUBB                               | P07437 | 18,05 | 18,16 | 34,91 | 21,89 |
| TUBA1C                             | Q9BQE3 | 18,05 | 26,54 | 30,47 | 17,02 |
| TUBB4B                             | P68371 | 18,05 | 15,36 | 36,18 | 17,02 |
| APOD                               | P05090 | 16,92 | 2,79  | 0,00  | 8,51  |
| PSMA8                              | Q8TAA3 | 16,92 | 11,17 | 0,00  | 10,94 |
| TUBB2A                             | Q13885 | 16,92 | 13,97 | 29,83 | 15,81 |
| YWHAQ                              | P27348 | 16,92 | 11,17 | 18,41 | 10,94 |
| CFI                                | P05156 | 16,92 | 0,00  | 0,00  | 3,65  |
| TUBB2B                             | Q9BVA1 | 16,92 | 13,97 | 28,56 | 15,81 |

|                |        |       |       |       |       |
|----------------|--------|-------|-------|-------|-------|
| <b>TUBA3E</b>  | Q6PEY2 | 15,80 | 20,95 | 0,00  | 15,81 |
| <b>ALDOA</b>   | P00883 | 15,80 | 25,14 | 19,04 | 18,24 |
| <b>VCL</b>     | P18206 | 15,80 | 9,78  | 16,50 | 17,02 |
| <b>FAT2</b>    | Q9NYQ8 | 15,80 | 0,00  | 0,00  | 0,00  |
| <b>TUBA3C</b>  | P0DPH7 | 15,80 | 20,95 | 0,00  | 15,81 |
| <b>ALDOA</b>   | P04075 | 15,80 | 34,92 | 19,04 | 25,54 |
| <b>LAMA1</b>   | P25391 | 15,80 | 0,00  | 0,00  | 0,00  |
| <b>IGHA1</b>   | P01876 | 15,80 | 8,38  | 0,00  | 12,16 |
| <b>DSG1</b>    | Q02413 | 14,67 | 12,57 | 10,16 | 20,67 |
| <b>ITGB4</b>   | P16144 | 14,67 | 9,78  | 36,82 | 14,59 |
| <b>HSPA1L</b>  | P34931 | 14,67 | 9,78  | 0,00  | 12,16 |
| <b>EFEMP1</b>  | Q12805 | 14,67 | 1,40  | 0,00  | 0,00  |
| <b>ATP1A3</b>  | P13637 | 14,67 | 13,97 | 28,56 | 17,02 |
| <b>GAPDH</b>   | P04406 | 13,54 | 15,36 | 21,58 | 12,16 |
| <b>ANXA6</b>   | P08133 | 13,54 | 32,13 | 36,82 | 8,51  |
| <b>HSP90B1</b> | P14625 | 13,54 | 25,14 | 24,12 | 15,81 |
| <b>PARK7</b>   | Q99497 | 13,54 | 5,59  | 2,54  | 8,51  |
| <b>ALDOC</b>   | P09972 | 13,54 | 6,98  | 10,16 | 10,94 |
| <b>IGKC</b>    | P01834 | 13,54 | 8,38  | 2,54  | 14,59 |
| <b>TUBB3</b>   | Q13509 | 13,54 | 15,36 | 32,37 | 14,59 |
| <b>IGHG3</b>   | P01860 | 13,54 | 1,40  | 0,00  | 8,51  |
| <b>FTH1</b>    | P02794 | 12,41 | 13,97 | 7,62  | 14,59 |
| <b>LAMB3</b>   | Q13751 | 12,41 | 0,00  | 9,52  | 3,65  |
| <b>PDIA3</b>   | P30101 | 12,41 | 11,17 | 16,50 | 10,94 |
| <b>UBC</b>     | P0CG48 | 12,41 | 6,98  | 27,29 | 9,73  |
| <b>UBB</b>     | P0CG47 | 12,41 | 6,98  | 27,29 | 9,73  |
| <b>UBA52</b>   | P62987 | 12,41 | 6,98  | 27,29 | 9,73  |
| <b>RPS27A</b>  | P62979 | 12,41 | 6,98  | 27,29 | 9,73  |
| <b>lacZ</b>    | P00722 | 12,41 | 13,97 | 0,00  | 17,02 |
| <b>NME2</b>    | P22392 | 12,41 | 6,98  | 7,62  | 6,08  |

|                  |        |       |       |       |       |
|------------------|--------|-------|-------|-------|-------|
| <b>DCD</b>       | P81605 | 11,28 | 11,17 | 3,81  | 12,16 |
| <b>RAB2A</b>     | P61019 | 11,28 | 4,19  | 7,62  | 4,86  |
| <b>P4HB</b>      | P07237 | 11,28 | 11,17 | 12,69 | 4,86  |
| <b>LYZ</b>       | P00698 | 11,28 | 2,79  | 0,00  | 3,65  |
| <b>AHCY</b>      | P23526 | 11,28 | 13,97 | 17,77 | 15,81 |
| <b>CST3</b>      | P01034 | 11,28 | 4,19  | 0,00  | 3,65  |
| <b>DES</b>       | P17661 | 11,28 | 9,78  | 4,44  | 8,51  |
| <b>NUCB1</b>     | Q02818 | 11,28 | 4,19  | 8,25  | 7,30  |
| <b>NME1</b>      | P15531 | 11,28 | 5,59  | 6,35  | 6,08  |
| <b>IGHG2</b>     | P01859 | 11,28 | 1,40  | 0,00  | 7,30  |
| <b>TUBB4A</b>    | P04350 | 11,28 | 11,17 | 30,47 | 12,16 |
| <b>FLNA</b>      | P21333 | 11,28 | 26,54 | 23,49 | 20,67 |
| <b>HSPA6</b>     | P17066 | 11,28 | 9,78  | 0,00  | 9,73  |
| <b>TIMP1</b>     | P01033 | 11,28 | 2,79  | 0,00  | 6,08  |
| <b>TUBB6</b>     | Q9BUF5 | 10,15 | 12,57 | 22,85 | 10,94 |
| <b>CFL1</b>      | P23528 | 10,15 | 13,97 | 4,44  | 14,59 |
| <b>ALDH1A1</b>   | P00352 | 10,15 | 1,40  | 16,50 | 7,30  |
| <b>EZR</b>       | P15311 | 10,15 | 15,36 | 13,33 | 12,16 |
| <b>PRDX2</b>     | P32119 | 10,15 | 13,97 | 5,08  | 7,30  |
| <b>HSPA7</b>     | P48741 | 10,15 | 8,38  | 0,00  | 8,51  |
| <b>COL6A1</b>    | P12109 | 10,15 | 1,40  | 4,44  | 4,86  |
| <b>RAN</b>       | P62826 | 10,15 | 12,57 | 10,79 | 15,81 |
| <b>ANXA5</b>     | P08758 | 9,03  | 32,13 | 15,87 | 21,89 |
| <b>EEF1A1</b>    | P68104 | 9,03  | 25,14 | 20,31 | 17,02 |
| <b>EEF1A1P5</b>  | Q5VTE0 | 9,03  | 25,14 | 20,31 | 17,02 |
| <b>POTEI</b>     | P0CG38 | 9,03  | 22,35 | 0,00  | 18,24 |
| <b>HSP90AB3P</b> | Q58FF7 | 9,03  | 12,57 | 0,00  | 10,94 |
| <b>RDX</b>       | P35241 | 9,03  | 12,57 | 13,33 | 10,94 |
| <b>MSN</b>       | P26038 | 9,03  | 11,17 | 21,58 | 6,08  |
| <b>TUBB1</b>     | Q9H4B7 | 9,03  | 11,17 | 0,00  | 9,73  |

|                  |        |      |       |       |       |
|------------------|--------|------|-------|-------|-------|
| <b>ITGA6</b>     | P23229 | 9,03 | 6,98  | 29,83 | 6,08  |
| <b>HSPG2</b>     | P98160 | 9,03 | 8,38  | 23,49 | 1,22  |
| <b>RAB3A</b>     | P20336 | 9,03 | 2,79  | 19,04 | 13,38 |
| <b>LTF</b>       | P02788 | 9,03 | 2,79  | 0,00  | 10,94 |
| <b>FLNB</b>      | O75369 | 7,90 | 26,54 | 11,43 | 26,75 |
| <b>ENO1</b>      | P06733 | 7,90 | 25,14 | 12,06 | 9,73  |
| <b>PGK1</b>      | P00558 | 7,90 | 18,16 | 11,43 | 8,51  |
| <b>EEF1A2</b>    | Q05639 | 7,90 | 18,16 | 16,50 | 13,38 |
| <b>HSP90AA2P</b> | Q14568 | 7,90 | 12,57 | 0,00  | 10,94 |
| <b>ATP1A2</b>    | P50993 | 7,90 | 8,38  | 19,04 | 10,94 |
| <b>KRT8</b>      | P05787 | 6,77 | 15,36 | 13,96 | 21,89 |
| <b>POTEJ</b>     | P0CG39 | 6,77 | 13,97 | 0,00  | 10,94 |
| <b>EEF2</b>      | P13639 | 6,77 | 12,57 | 20,95 | 21,89 |
| <b>ATP5F1B</b>   | P06576 | 6,77 | 5,59  | 27,29 | 4,86  |
| <b>TUBA4A</b>    | P68366 | 6,77 | 8,38  | 24,12 | 6,08  |
| <b>KRT71</b>     | Q3SY84 | 6,77 | 9,78  | 0,00  | 13,38 |
| <b>EPHA2</b>     | P29317 | 6,77 | 6,98  | 16,50 | 10,94 |
| <b>LDHA</b>      | P00338 | 5,64 | 29,33 | 6,35  | 17,02 |
| <b>ITGA2</b>     | P17301 | 5,64 | 13,97 | 17,77 | 10,94 |
| <b>EEF1G</b>     | P26641 | 5,64 | 9,78  | 12,69 | 10,94 |
| <b>HLA-B</b>     | P01889 | 4,51 | 13,97 | 3,81  | 8,51  |
| <b>CLTC</b>      | Q00610 | 4,51 | 12,57 | 52,68 | 8,51  |
| <b>FAM149B1</b>  | Q96BN6 | 4,51 | 12,57 | 7,62  | 0,00  |
| <b>RAB15</b>     | P59190 | 4,51 | 11,17 | 9,52  | 8,51  |
| <b>AHNAK</b>     | Q09666 | 4,51 | 8,38  | 5,71  | 13,38 |
| <b>S100A8</b>    | P05109 | 4,51 | 6,98  | 0,00  | 10,94 |
| <b>SERPINB5</b>  | P36952 | 3,38 | 25,14 | 5,08  | 23,10 |
| <b>VCP</b>       | P55072 | 3,38 | 25,14 | 15,87 | 19,46 |
| <b>ANXA1</b>     | P04083 | 3,38 | 20,95 | 10,16 | 19,46 |
| <b>LGALS1</b>    | P09382 | 3,38 | 18,16 | 4,44  | 14,59 |

|                |        |      |       |       |       |
|----------------|--------|------|-------|-------|-------|
| <b>S100A2</b>  | P29034 | 3,38 | 12,57 | 0,00  | 7,30  |
| <b>LDHB</b>    | P07195 | 2,26 | 11,17 | 9,52  | 2,43  |
| <b>NT5E</b>    | P21589 | 1,13 | 15,36 | 11,43 | 9,73  |
| <b>PLEC</b>    | Q15149 | 0,00 | 16,76 | 24,12 | 10,94 |
| <b>DYNC1H1</b> | Q14204 | 0,00 | 2,79  | 97,75 | 2,43  |

**Supplementary Table S5.** List of miRNAs identified by next generation sequencing and represented by at least 1000 copies in exosomes isolated from bronchial epithelial cell lines with and without contact with *P. aeruginosa*.

| miARN           | Average normalized reads |                                |           |                                |
|-----------------|--------------------------|--------------------------------|-----------|--------------------------------|
|                 | NuLi                     | NuLi +<br><i>P. aeruginosa</i> | CuFi      | CuFi +<br><i>P. aeruginosa</i> |
| hsa-mir-21      | 410262,66                | 349571,09                      | 333614,25 | 313090,84                      |
| hsa-miR-21-5p   | 409628,56                | 348901,11                      | 333040,49 | 312670,11                      |
| hsa-mir-205     | 297766,65                | 273573,78                      | 279264,28 | 173274,19                      |
| hsa-miR-205-5p  | 297676,07                | 273425,72                      | 279193,88 | 173196,45                      |
| hsa-mir-16-2    | 170280,08                | 186563,06                      | 181336,91 | 196039,63                      |
| hsa-miR-16-5p   | 170225,64                | 186525,40                      | 181269,33 | 195980,15                      |
| hsa-mir-16-1    | 170075,58                | 186327,17                      | 181122,90 | 195801,80                      |
| hsa-mir-221     | 100498,89                | 57588,94                       | 128908,16 | 77840,53                       |
| hsa-miR-221-3p  | 100170,40                | 57388,19                       | 128390,72 | 77666,76                       |
| hsa-let-7b      | 79640,39                 | 70599,77                       | 72979,84  | 64413,61                       |
| hsa-let-7b-5p   | 79528,30                 | 70496,88                       | 72892,54  | 64372,47                       |
| hsa-mir-92a-1   | 77799,39                 | 100551,02                      | 67987,09  | 103157,79                      |
| hsa-mir-92a-2   | 77379,87                 | 99946,28                       | 67457,68  | 102631,89                      |
| hsa-miR-92a-3p  | 77379,41                 | 99946,28                       | 67457,68  | 102631,89                      |
| hsa-mir-23a     | 58856,00                 | 38405,17                       | 57465,15  | 49491,24                       |
| hsa-miR-23a-3p  | 58831,75                 | 38390,10                       | 57441,21  | 49472,95                       |
| hsa-mir-27a     | 41916,02                 | 27221,12                       | 42374,98  | 33530,73                       |
| hsa-miR-27a-3p  | 41886,28                 | 27163,42                       | 42288,39  | 33384,38                       |
| hsa-mir-30a     | 40365,08                 | 32232,24                       | 40023,63  | 28061,18                       |
| hsa-miR-30a-5p  | 39255,18                 | 31178,32                       | 38812,05  | 27375,19                       |
| hsa-mir-29a     | 38085,34                 | 27399,28                       | 55154,63  | 31152,68                       |
| hsa-miR-29a-3p  | 38055,60                 | 27371,68                       | 55120,84  | 31111,50                       |
| hsa-mir-423     | 26529,72                 | 28872,27                       | 24523,03  | 32538,38                       |
| hsa-mir-320a    | 25240,02                 | 26515,99                       | 22647,58  | 28125,20                       |
| hsa-miR-320a-3p | 25239,56                 | 26490,92                       | 22642,65  | 28084,06                       |
| hsa-mir-24-1    | 25176,42                 | 23045,62                       | 30419,70  | 29817,30                       |
| hsa-miR-24-3p   | 25175,96                 | 23043,09                       | 30418,30  | 29817,30                       |
| hsa-mir-24-2    | 25165,44                 | 23030,56                       | 30391,55  | 29794,46                       |
| hsa-mir-30d     | 22966,22                 | 22937,70                       | 20884,77  | 16765,38                       |
| hsa-miR-30d-5p  | 22939,23                 | 22892,54                       | 20863,65  | 16765,38                       |
| hsa-let-7a-3    | 21446,85                 | 33956,15                       | 33878,44  | 43495,76                       |
| hsa-let-7a-1    | 21430,38                 | 33928,55                       | 33904,49  | 43372,31                       |
| hsa-let-7a-2    | 21189,28                 | 33655,03                       | 33567,27  | 43107,05                       |
| hsa-let-7a-5p   | 21170,06                 | 33617,37                       | 33545,45  | 43043,02                       |
| hsa-mir-148a    | 20623,34                 | 20581,45                       | 21499,36  | 33187,77                       |
| hsa-miR-148a-3p | 20600,01                 | 20553,85                       | 21472,61  | 33142,01                       |
| hsa-mir-93      | 20282,51                 | 22486,02                       | 21405,73  | 19202,91                       |
| hsa-let-7i      | 20234,92                 | 21120,96                       | 15442,88  | 13971,15                       |



|                 |          |          |          |          |
|-----------------|----------|----------|----------|----------|
| hsa-let-7i-5p   | 20209,30 | 21085,82 | 15420,35 | 13929,97 |
| hsa-miR-93-5p   | 19930,69 | 22094,57 | 21038,95 | 18896,51 |
| hsa-mir-31      | 18809,34 | 12180,26 | 20811,55 | 8300,37  |
| hsa-mir-141     | 18530,73 | 14937,99 | 17673,84 | 21237,95 |
| hsa-miR-31-5p   | 18521,12 | 11994,57 | 20533,47 | 8172,33  |
| hsa-miR-423-5p  | 18444,26 | 19314,25 | 15577,34 | 23487,99 |
| hsa-miR-141-3p  | 18166,09 | 14521,45 | 17337,33 | 20890,42 |
| hsa-mir-25      | 17676,11 | 17615,43 | 16270,07 | 16669,35 |
| hsa-miR-25-3p   | 17625,78 | 17550,20 | 16211,64 | 16596,16 |
| hsa-mir-103a-2  | 17261,61 | 16666,91 | 14579,07 | 10861,35 |
| hsa-mir-103a-1  | 17233,25 | 16644,34 | 14548,09 | 10797,33 |
| hsa-miR-103a-3p | 17232,33 | 16644,34 | 14546,69 | 10797,33 |
| hsa-mir-125b-1  | 16294,45 | 21294,11 | 18822,76 | 22111,47 |
| hsa-mir-222     | 15649,82 | 10027,24 | 18579,88 | 14026,01 |
| hsa-mir-125b-2  | 15647,08 | 20689,35 | 18447,54 | 21567,24 |
| hsa-miR-222-3p  | 15640,67 | 10014,70 | 18560,88 | 14007,75 |
| hsa-miR-125b-5p | 15535,45 | 20508,68 | 18281,39 | 21416,31 |
| hsa-mir-151a    | 14909,13 | 13931,75 | 16038,46 | 14730,29 |
| hsa-mir-26a-2   | 14888,54 | 18910,26 | 17150,07 | 18164,79 |
| hsa-mir-26a-1   | 14887,62 | 18917,77 | 17148,66 | 18155,62 |
| hsa-miR-26a-5p  | 14875,73 | 18905,23 | 17137,39 | 18146,49 |
| hsa-miR-151a-3p | 14681,75 | 13733,52 | 15792,06 | 14506,22 |
| hsa-mir-200c    | 13151,40 | 13091,12 | 17210,61 | 16550,43 |
| hsa-miR-200c-3p | 13057,15 | 13003,29 | 17121,91 | 16468,11 |
| hsa-mir-27b     | 12573,57 | 13793,75 | 11137,93 | 13897,96 |
| hsa-miR-27b-3p  | 12570,83 | 13788,72 | 11135,82 | 13893,42 |
| hsa-mir-100     | 12377,76 | 9284,50  | 10774,67 | 5538,15  |
| hsa-miR-100-5p  | 12368,61 | 9261,91  | 10763,41 | 5519,85  |
| hsa-mir-30e     | 10894,53 | 13472,54 | 10985,17 | 13367,48 |
| hsa-miR-30e-5p  | 10714,28 | 13259,25 | 10795,09 | 13276,03 |
| hsa-mir-26b     | 10693,23 | 12684,61 | 13252,04 | 14309,56 |
| hsa-miR-26b-5p  | 10679,96 | 12672,07 | 13237,25 | 14309,56 |
| hsa-miR-320b    | 9895,34  | 16275,46 | 9667,99  | 17090,08 |
| hsa-mir-320b-2  | 9895,34  | 16275,46 | 9667,99  | 17090,08 |
| hsa-mir-320b-1  | 9874,76  | 16240,33 | 9646,87  | 17044,36 |
| hsa-mir-20a     | 9661,56  | 8564,31  | 9736,28  | 8730,23  |
| hsa-miR-20a-5p  | 9643,26  | 8554,28  | 9722,90  | 8711,97  |
| hsa-miR-320c    | 9355,49  | 15673,22 | 9132,25  | 16491,00 |
| hsa-mir-320c-2  | 9355,49  | 15673,22 | 9132,25  | 16491,00 |
| hsa-mir-320c-1  | 9322,55  | 15643,12 | 9107,61  | 16463,53 |
| hsa-mir-181b-2  | 9002,76  | 8872,96  | 6830,88  | 5048,81  |
| hsa-miR-181b-5p | 8986,29  | 8850,37  | 6826,66  | 5044,23  |
| hsa-mir-181b-1  | 8767,14  | 8632,07  | 6704,16  | 4993,96  |
| hsa-mir-378a    | 8732,83  | 8890,53  | 9443,42  | 8602,19  |
| hsa-miR-378a-3p | 8638,58  | 8750,00  | 9278,68  | 8492,44  |

|                 |         |          |          |          |
|-----------------|---------|----------|----------|----------|
| hsa-let-7f-2    | 8440,48 | 18300,49 | 9767,95  | 15388,82 |
| hsa-let-7f-5p   | 8423,55 | 18287,93 | 9726,42  | 15370,56 |
| hsa-mir-23b     | 8335,71 | 3646,05  | 5854,44  | 4765,30  |
| hsa-let-7f-1    | 8322,45 | 18057,07 | 9565,21  | 15096,17 |
| hsa-miR-23b-3p  | 8310,10 | 3598,36  | 5836,14  | 4756,13  |
| hsa-miR-423-3p  | 8085,00 | 9558,00  | 8945,69  | 9050,38  |
| hsa-mir-503     | 6781,58 | 3957,20  | 1731,83  | 1513,74  |
| hsa-miR-503-5p  | 6733,99 | 3924,57  | 1712,82  | 1504,57  |
| hsa-mir-320d-1  | 6574,33 | 12293,16 | 6573,22  | 12384,22 |
| hsa-miR-320d    | 6548,25 | 12250,50 | 6555,62  | 12365,97 |
| hsa-mir-320d-2  | 6548,25 | 12250,50 | 6555,62  | 12365,97 |
| hsa-mir-361     | 6526,75 | 5241,97  | 6398,63  | 5186,03  |
| hsa-mir-181a-2  | 5813,50 | 5385,00  | 4415,47  | 3032,02  |
| hsa-miR-361-5p  | 5791,54 | 4466,58  | 5574,25  | 4472,61  |
| hsa-mir-155     | 5728,40 | 4343,65  | 5976,93  | 3210,38  |
| hsa-miR-155-5p  | 5728,40 | 4343,65  | 5976,93  | 3210,38  |
| hsa-mir-22      | 5559,58 | 4725,06  | 5648,16  | 6718,02  |
| hsa-mir-125a    | 5465,34 | 12350,89 | 6289,51  | 15530,62 |
| hsa-miR-22-3p   | 5295,14 | 4599,58  | 5400,36  | 6567,14  |
| hsa-miR-125a-5p | 5273,65 | 12089,90 | 6114,92  | 15297,37 |
| hsa-mir-424     | 5076,91 | 3317,33  | 1525,56  | 1317,09  |
| hsa-mir-101-2   | 4976,26 | 5723,75  | 4151,47  | 5218,04  |
| hsa-miR-101-3p  | 4976,26 | 5723,75  | 4150,77  | 5218,04  |
| hsa-mir-128-1   | 4957,97 | 5036,21  | 4423,22  | 6178,42  |
| hsa-mir-101-1   | 4891,17 | 5615,86  | 4080,36  | 5158,56  |
| hsa-mir-128-2   | 4718,23 | 4697,44  | 4169,77  | 5876,56  |
| hsa-miR-128-3p  | 4718,23 | 4697,44  | 4169,77  | 5876,56  |
| hsa-miR-424-5p  | 4559,03 | 2968,52  | 1388,99  | 1193,63  |
| hsa-mir-425     | 4429,09 | 4757,67  | 5548,90  | 4614,37  |
| hsa-mir-148b    | 4371,44 | 5199,31  | 4675,95  | 6978,70  |
| hsa-mir-191     | 4365,95 | 6308,43  | 7364,51  | 6265,28  |
| hsa-miR-148b-3p | 4350,86 | 5176,74  | 4634,41  | 6900,96  |
| hsa-mir-181a-1  | 4339,42 | 4752,66  | 3803,70  | 2780,52  |
| hsa-miR-191-5p  | 4312,89 | 6238,16  | 7295,52  | 6160,12  |
| hsa-mir-200a    | 4163,28 | 4752,66  | 5273,64  | 5963,47  |
| hsa-mir-19b-1   | 4162,37 | 3332,37  | 5465,13  | 3489,35  |
| hsa-mir-19b-2   | 4154,13 | 3317,33  | 5460,90  | 3484,76  |
| hsa-miR-19b-3p  | 4154,13 | 3317,33  | 5460,90  | 3484,76  |
| hsa-mir-12136   | 4137,21 | 14656,94 | 10471,95 | 22532,20 |
| hsa-miR-107     | 4118,45 | 2677,44  | 3403,12  | 2583,87  |
| hsa-mir-107     | 4118,45 | 2677,44  | 3403,12  | 2583,87  |
| hsa-miR-200a-3p | 4112,96 | 4704,97  | 5228,59  | 5936,04  |
| hsa-miR-181a-5p | 4108,84 | 4544,38  | 3572,79  | 2629,59  |
| hsa-miR-425-5p  | 4042,96 | 4283,42  | 5041,32  | 4170,76  |
| hsa-miR-12136   | 3955,12 | 14656,94 | 10471,95 | 22532,20 |

|                 |         |          |         |          |
|-----------------|---------|----------|---------|----------|
| hsa-mir-138-1   | 3388,73 | 2112,86  | 3603,06 | 2318,61  |
| hsa-mir-183     | 3257,88 | 4002,37  | 4830,83 | 4879,63  |
| hsa-miR-183-5p  | 3249,19 | 3994,84  | 4818,16 | 4875,04  |
| hsa-mir-186     | 3214,42 | 2812,96  | 3621,36 | 2780,52  |
| hsa-miR-186-5p  | 3212,59 | 2810,43  | 3618,54 | 2766,80  |
| hsa-miR-138-5p  | 3203,90 | 1949,74  | 3444,65 | 2176,85  |
| hsa-let-7e      | 2929,40 | 3417,70  | 3901,55 | 4097,61  |
| hsa-let-7e-5p   | 2909,27 | 3382,57  | 3874,80 | 4074,72  |
| hsa-mir-1307    | 2784,82 | 3460,36  | 2228,15 | 2693,61  |
| hsa-mir-28      | 2690,12 | 2040,07  | 3205,30 | 2496,96  |
| hsa-miR-28-3p   | 2656,26 | 2027,53  | 3161,65 | 2419,22  |
| hsa-miR-1307-3p | 2579,86 | 3026,25  | 1976,82 | 2378,09  |
| hsa-mir-146a    | 2555,61 | 1146,77  | 145,02  | 201,24   |
| hsa-miR-146a-5p | 2555,16 | 1146,77  | 145,02  | 201,24   |
| hsa-mir-92b     | 2433,01 | 3101,52  | 2433,72 | 3251,56  |
| hsa-mir-342     | 2421,11 | 3317,33  | 2647,03 | 3873,53  |
| hsa-miR-342-3p  | 2416,08 | 3314,81  | 2639,99 | 3864,36  |
| hsa-mir-335     | 2379,48 | 4398,85  | 2473,85 | 7577,78  |
| hsa-miR-92b-3p  | 2323,66 | 2973,55  | 2339,38 | 3068,62  |
| hsa-mir-34a     | 2320,00 | 2511,84  | 1298,17 | 1614,36  |
| hsa-mir-7-1     | 2318,63 | 12970,69 | 2629,42 | 20442,22 |
| hsa-let-7g      | 2318,63 | 3013,69  | 2987,06 | 3530,53  |
| hsa-mir-7-3     | 2313,14 | 12948,09 | 2689,97 | 20442,22 |
| hsa-miR-34a-5p  | 2313,14 | 2506,81  | 1296,06 | 1614,36  |
| hsa-mir-138-2   | 2312,68 | 1382,63  | 2212,66 | 1568,59  |
| hsa-let-7g-5p   | 2310,39 | 3008,68  | 2982,13 | 3521,36  |
| hsa-miR-7-5p    | 2299,87 | 12958,13 | 2613,94 | 20423,92 |
| hsa-mir-7-2     | 2298,04 | 12958,13 | 2612,54 | 20401,08 |
| hsa-mir-200b    | 2245,88 | 4737,60  | 3009,59 | 7925,36  |
| hsa-miR-335-5p  | 2132,88 | 4087,69  | 2160,56 | 7170,77  |
| hsa-miR-200b-3p | 2108,64 | 4619,67  | 2867,38 | 7783,61  |
| hsa-mir-99b     | 2085,76 | 2245,85  | 2307,00 | 1929,89  |
| hsa-mir-29c     | 2035,89 | 5502,93  | 2830,07 | 9763,80  |
| hsa-miR-29c-3p  | 2013,02 | 5477,86  | 2793,46 | 9722,62  |
| hsa-mir-29b-1   | 1927,01 | 2436,55  | 3496,75 | 3388,73  |
| hsa-mir-193a    | 1927,01 | 1545,75  | 1556,54 | 1852,15  |
| hsa-miR-193a-5p | 1919,69 | 1535,70  | 1546,68 | 1852,15  |
| hsa-mir-29b-2   | 1910,54 | 2436,55  | 3472,11 | 3370,43  |
| hsa-miR-29b-3p  | 1903,22 | 2418,98  | 3465,07 | 3365,89  |
| hsa-mir-130a    | 1822,24 | 1528,19  | 1598,78 | 1788,13  |
| hsa-miR-130a-3p | 1817,66 | 1528,19  | 1597,37 | 1788,13  |
| hsa-mir-17      | 1802,57 | 983,65   | 1507,25 | 1125,02  |
| hsa-mir-182     | 1798,45 | 3129,12  | 2827,25 | 4230,24  |
| hsa-miR-182-5p  | 1785,18 | 2579,58  | 2789,94 | 3795,75  |
| hsa-mir-106b    | 1760,47 | 1432,83  | 2009,21 | 1001,52  |

|                   |         |         |         |         |
|-------------------|---------|---------|---------|---------|
| hsa-miR-17-5p     | 1749,49 | 956,05  | 1414,33 | 1097,55 |
| hsa-let-7c        | 1732,11 | 3121,61 | 3204,59 | 4440,60 |
| hsa-let-7c-5p     | 1730,73 | 3116,58 | 3201,78 | 4436,02 |
| hsa-mir-152       | 1719,30 | 2107,83 | 1779,70 | 2533,56 |
| hsa-miR-152-3p    | 1716,56 | 2107,83 | 1779,00 | 2533,56 |
| hsa-miR-181a-2-3p | 1699,63 | 830,59  | 826,49  | 393,30  |
| hsa-miR-99b-5p    | 1681,78 | 1816,75 | 1912,06 | 1719,52 |
| hsa-miR-106b-3p   | 1657,53 | 1350,00 | 1907,83 | 932,95  |
| hsa-mir-132       | 1640,61 | 1508,10 | 921,53  | 1847,56 |
| hsa-mir-15b       | 1587,54 | 1417,76 | 2211,25 | 1486,27 |
| hsa-miR-132-3p    | 1568,78 | 1427,80 | 849,02  | 1746,95 |
| hsa-let-7d        | 1561,00 | 1588,39 | 837,75  | 978,68  |
| hsa-mir-429       | 1500,16 | 3076,42 | 2164,09 | 5039,69 |
| hsa-miR-429       | 1499,70 | 3076,42 | 2164,09 | 5039,69 |
| hsa-mir-532       | 1496,50 | 1360,06 | 2077,49 | 1564,05 |
| hsa-mir-224       | 1489,63 | 1824,28 | 3234,16 | 3064,03 |
| hsa-miR-224-5p    | 1489,63 | 1824,28 | 3233,46 | 3064,03 |
| hsa-miR-532-5p    | 1438,85 | 1282,27 | 1990,20 | 1495,44 |
| hsa-mir-708       | 1418,26 | 1954,77 | 2883,57 | 2853,67 |
| hsa-miR-708-5p    | 1388,52 | 1924,64 | 2830,77 | 2794,23 |
| hsa-mir-660       | 1367,48 | 1327,43 | 1821,94 | 1289,66 |
| hsa-miR-660-5p    | 1363,82 | 1327,43 | 1819,13 | 1289,66 |
| hsa-miR-15b-5p    | 1211,47 | 1041,38 | 1748,73 | 1134,15 |
| hsa-mir-584       | 1155,65 | 963,58  | 2139,45 | 2739,34 |
| hsa-miR-584-5p    | 1154,28 | 963,58  | 2136,63 | 2734,79 |
| hsa-miR-30a-3p    | 1108,99 | 1053,91 | 1211,58 | 685,99  |
| hsa-mir-185       | 1024,35 | 777,89  | 1307,32 | 836,88  |
| hsa-let-7d-5p     | 1016,11 | 1031,32 | 620,92  | 685,99  |
| hsa-miR-185-5p    | 1001,02 | 750,29  | 1288,31 | 809,45  |
| hsa-mir-339       | 908,60  | 1605,96 | 1627,64 | 1513,74 |
| hsa-mir-19a       | 906,32  | 782,90  | 1124,28 | 955,79  |
| hsa-miR-19a-3p    | 904,94  | 780,40  | 1122,17 | 946,67  |
| hsa-mir-345       | 893,51  | 1084,02 | 1532,60 | 1294,20 |
| hsa-miR-345-5p    | 893,05  | 1081,51 | 1527,67 | 1275,91 |
| hsa-mir-126       | 885,27  | 1189,41 | 1105,27 | 1468,02 |
| hsa-mir-629       | 855,07  | 1056,42 | 1127,10 | 1582,35 |
| hsa-miR-629-5p    | 847,75  | 1053,91 | 1119,35 | 1564,05 |
| hsa-mir-454       | 811,61  | 988,68  | 1403,06 | 1134,15 |
| hsa-mir-192       | 797,43  | 1006,25 | 869,44  | 1614,36 |
| hsa-miR-192-5p    | 796,06  | 1001,22 | 868,03  | 1596,06 |
| hsa-miR-1246      | 777,30  | 3846,78 | 765,25  | 5135,72 |
| hsa-mir-1246      | 777,30  | 3846,78 | 765,25  | 5135,72 |
| hsa-miR-454-3p    | 711,42  | 777,89  | 1249,60 | 1001,52 |
| hsa-mir-210       | 690,83  | 552,04  | 1076,41 | 585,37  |

|                 |        |         |         |         |
|-----------------|--------|---------|---------|---------|
| hsa-miR-210-3p  | 684,88 | 544,51  | 1070,78 | 553,36  |
| hsa-miR-339-5p  | 617,17 | 1390,16 | 1263,68 | 1230,18 |
| hsa-mir-375     | 456,59 | 4175,52 | 480,12  | 6754,62 |
| hsa-miR-375-3p  | 455,22 | 4173,00 | 480,12  | 6754,62 |
| hsa-mir-199b    | 414,95 | 915,89  | 261,89  | 1303,37 |
| hsa-mir-199a-2  | 401,23 | 898,33  | 253,44  | 1298,79 |
| hsa-mir-199a-1  | 401,23 | 878,26  | 253,44  | 1294,20 |
| hsa-miR-199a-3p | 400,32 | 873,25  | 251,33  | 1266,78 |
| hsa-miR-199b-3p | 400,32 | 873,25  | 251,33  | 1266,78 |
| hsa-mir-203a    | 347,24 | 2910,82 | 835,64  | 2163,13 |
| hsa-miR-203a-3p | 345,87 | 2898,26 | 832,13  | 2153,96 |
| hsa-mir-6724-1  | 304,24 | 639,87  | 626,56  | 1074,71 |
| hsa-mir-6724-2  | 304,24 | 639,87  | 626,56  | 1074,71 |
| hsa-mir-6724-3  | 304,24 | 639,87  | 626,56  | 1074,71 |
| hsa-mir-6724-4  | 304,24 | 639,87  | 626,56  | 1074,71 |
| hsa-mir-9-1     | 298,75 | 388,95  | 1389,69 | 1806,43 |
| hsa-mir-9-2     | 298,75 | 388,95  | 1389,69 | 1797,26 |
| hsa-mir-9-3     | 298,75 | 386,44  | 1389,69 | 1792,71 |
| hsa-miR-1275    | 231,50 | 883,29  | 464,64  | 2140,25 |
| hsa-mir-1275    | 231,50 | 883,29  | 464,64  | 2140,25 |
| hsa-miR-9-5p    | 204,96 | 291,08  | 1078,52 | 1417,71 |
| hsa-mir-143     | 194,90 | 1688,78 | 188,67  | 3370,43 |
| hsa-miR-143-3p  | 193,98 | 1686,25 | 187,97  | 3356,72 |
| hsa-mir-219b    | 128,56 | 2017,50 | 66,88   | 1714,93 |
| hsa-mir-376c    | 116,20 | 850,66  | 198,53  | 1550,34 |
| hsa-miR-376c-3p | 116,20 | 850,66  | 197,82  | 1550,34 |

**Supplementary Table S6.** Prediction of the biological targets of miRNAs whose expression appears altered in exosomes from bronchial epithelial cell lines with and without contact with *P. aeruginosa*. Colors indicate the number of genes potentially regulated by a miRNA. dark blue: 7; red: 6; purple: 5; green: 4; brown: 3; light blue: 2; black: 1

| Downregulated miRNA                                                                      | Regulated Genes                                                                                                                                                                                                                                                                                                                                                                                                                                                                                                                                                                                                                                                                                                                                                                                                                                                                                                                                                                                                                                                                                                                                                                                                                                                                                                                                                                                                                                                                                                                                                                                                                                                                                                                                                                                                                                                                                                                                                                                                                                                                                                                                                                                                                                                                                                                                                                                                                                                                                                                                                                                                                                                                                                                                                                                                                                                                                                                                                                                                                                                                                                                                                                                                                                                                                                                                                                                                                                                                                                                                                                                                                                                                                                                                                                                                                                                                                                                                                                                                                                                                                                                                                                                                                                                                                              |
|------------------------------------------------------------------------------------------|--------------------------------------------------------------------------------------------------------------------------------------------------------------------------------------------------------------------------------------------------------------------------------------------------------------------------------------------------------------------------------------------------------------------------------------------------------------------------------------------------------------------------------------------------------------------------------------------------------------------------------------------------------------------------------------------------------------------------------------------------------------------------------------------------------------------------------------------------------------------------------------------------------------------------------------------------------------------------------------------------------------------------------------------------------------------------------------------------------------------------------------------------------------------------------------------------------------------------------------------------------------------------------------------------------------------------------------------------------------------------------------------------------------------------------------------------------------------------------------------------------------------------------------------------------------------------------------------------------------------------------------------------------------------------------------------------------------------------------------------------------------------------------------------------------------------------------------------------------------------------------------------------------------------------------------------------------------------------------------------------------------------------------------------------------------------------------------------------------------------------------------------------------------------------------------------------------------------------------------------------------------------------------------------------------------------------------------------------------------------------------------------------------------------------------------------------------------------------------------------------------------------------------------------------------------------------------------------------------------------------------------------------------------------------------------------------------------------------------------------------------------------------------------------------------------------------------------------------------------------------------------------------------------------------------------------------------------------------------------------------------------------------------------------------------------------------------------------------------------------------------------------------------------------------------------------------------------------------------------------------------------------------------------------------------------------------------------------------------------------------------------------------------------------------------------------------------------------------------------------------------------------------------------------------------------------------------------------------------------------------------------------------------------------------------------------------------------------------------------------------------------------------------------------------------------------------------------------------------------------------------------------------------------------------------------------------------------------------------------------------------------------------------------------------------------------------------------------------------------------------------------------------------------------------------------------------------------------------------------------------------------------------------------------------------------|
| <b>Genes potentially regulated by miRNAs whose levels are increased in CuFi and Nuli</b> |                                                                                                                                                                                                                                                                                                                                                                                                                                                                                                                                                                                                                                                                                                                                                                                                                                                                                                                                                                                                                                                                                                                                                                                                                                                                                                                                                                                                                                                                                                                                                                                                                                                                                                                                                                                                                                                                                                                                                                                                                                                                                                                                                                                                                                                                                                                                                                                                                                                                                                                                                                                                                                                                                                                                                                                                                                                                                                                                                                                                                                                                                                                                                                                                                                                                                                                                                                                                                                                                                                                                                                                                                                                                                                                                                                                                                                                                                                                                                                                                                                                                                                                                                                                                                                                                                                              |
| <b>hsa-miR-12136</b>                                                                     | <p> <i>NUFIP2, PRKG1, ZBTB20, BRWD3, DDX3X, FSTL1, MBNL3, MIER3, PTAR1, SESN3, AHR, ATL2, ATXN1, CASK, CNOT6, CTDSPL2, DGKH, EGLN1, FRMD4B, GPM6A, INO80D, MAP3K2, NFIA, PPP1R9A, RFX7, SLC4A7, STRN, TMEFF2, ZNF704, ARID4B, ATXN7, BNIP2, C5orf24, CACNB4, CADM2, CCNT2, CEP97, COL19A1, CREB1, CYTH3, DNMT3B, DPYSL2, EIF5A2, ETS1, FBXO28, GAB1, GLCE, GMFB, GUCY1A2, HOOK3, MAP4K3, MBNL2, MMD, MYEF2, NRXN1, OSBPL8, PGAP1, PHTF2, PIK3CA, PTP4A1, RAP2C, RBMS3, RC3H1, RNF138, ROBO2, SECISBP2L, SEL1L, SMNDC1, STX16, TAOK1, THSD7A, TMEM65, TNPO1, TRIM33, UBE2R2, ULK2, USP37, YTHDF3, ZC3H6, ZFHX3, ZMYM2, ABCB1, ABHD13, ACVR1C, AEBP2, ALDH1L2, ARHGAP12, ARL5A, ATAD1, ATP11C, BAZ1A, BCL11B, C11orf87, CBX5, CCDC50, CCDC88A, CCSER1, CDC42SE2, CDC73, CNTLN, COL25A1, CORO1C, CPEB2, CPED1, CREBRF, CTBP2, DAAM1, EEA1, EFN82, ELAVL2, ETNK1, EVI5, EXD1, FAM168B, FAM19A2, FAT4, FBXO33, FBXO9, FGF14, FGFR1OP2, FGL2, GIT2, GNAQ, GPC4, GPR137B, HDAC9, HIPK1, HIPK2, HIPK3, HMBOX1, HMGCLL1, HOOK1, IPMK, ITGB1, KCNK2, KDM4C, KLF6, KLF8, KLHL15, KLHL24, LRRC58, MAGT1, MAPK1IP1L, MED13, MEX3D, MGAT4A, MYNN, NAV1, NEK7, NETO2, NFAT5, NFE2L2, NOTCH1, NUCKS1, OCLN, ONECUT2, PAG1, PARP8, PDLIM5, PEX3, PFDN4, PHC3, PIWIL1, PLXNC1, PPFIA1, PPP3CA, PRKACB, PSD3, PTGFRN, PUM2, RALGPS2, RBFOX2, RBPJ, RDH10, REEP3, RND3, RNF2, RORA, RTKN2, SCAMP1, SEC24A, SETD2, SGIP1, SGMS2, SH3GLB1, SIX4, SKIL, SLAIN1, SLC17A6, SLC19A2, SLC35A3, SLC38A2, SLC39A14, SLC4A4, SMIM14, SP1, SSBP3, STAM2, STXBPS, SUZ12, SYT14, TAL1, TBL1XR1, TCF4, TM9SF2, TM9SF3, TMEM181, TMEM64, TMX3, TP53INP1, TTC30B, TTPA, UBE2W, USP25, VGLL3, ZC3H12C, ZEB2, ZFHX4, ZFP36L1, ZMAT3, ABCG2, ACP, ACVR2A, ADAM22, ADD3, ADK, ANAPC16, ANKRD12, ANKRD27, ANKRD50, APAF1, ARL13B, ARL8B, ARPP19, BACH2, BAG4, C6orf47, CAMK4, CDC42BPA, CDK19, CDK6, CHIC1, CLOCK, CNOT6L, COL11A1, CPEB3, CPNE4, CRLF3, DCP2, DCUN1D4, DCX, DLX5, DTWD2, ECHDC1, EFR3A, EGR3, EIF2AK3, ELMSAN1, ELOVL5, EOGT, ETV1, FAM126B, FGD4, FRS2, GABRA1, GRB10, GRIP1, HDAC4, IDE, IGSF11, IKZF2, JAG1, KCNA1, KCTD12, KCTD5, KDM5A, KIAA1211, KLF9, KMT2E, KPNA1, LCA5, LIMCH1, MBTD1, MDFIC, MED14, MTF1, MYO6, MYOT, NAMPT, NEDD4L, NEUROD1, NOTCH2, NR4A3, NT5E, NUDT21, NXT2, PAK2, PAN3, PCDHA1, PCDHA10, PCDHA11, PCDHA12, PCDHA13, PCDHA2, PCDHA3, PCDHA4, PCDHA5, PCDHA6, PCDHA7, PCDHA8, PCDHAC1, PCDHAC2, PDAP1, PEX5L, PMP22, PPAT, PRKAR2B, PRKCI, PRPF4B, PRR14L, PRR3, PRRC1, PRRC2C, PTBP3, PTPRK, RAB14, RAB30, RAD21, RERE, RFX3, RSNB1, RYBP, SGTB, SIRT1, SKIDA1, SLC5A3, SLC7A11, SLC7A2, SMIM17, SMPD3, SNX18, SORBS2, SOX21, SOX6, SP3, SPTBN1, SPTY2D1, SRF, ST8SIA4, STX17, TENM1, TFAP2C, TFDP1, TLL1, TMEM120B, TMEM135, TMEM236, TNRC18, UBE2D3, UBR3, VAPA, ZBTB44, ZBTB7A, ZFP36L2, ZIC3, ZNF148, ZNF608, ZNF652, ZNRF2, 37104, 38200, 39326, 40422, AAK1, ABCA1, ABCB10, ABHD18, ACAP2, ACER3, ACSL6, ACTL6A, ACTR3, ACVR1, ACVR2B, ADAM17, ADAMDEC1, ADCY7, ADGRB3, AGTR2, AHCTF1, AHDC1, AKAP1, AMOT, ANKRD10, ANKRD13A, ANKS1B, ANXA4, AP1S3, AP3B1, AP4E1, APPBP2, APPL1, AREG, ARF3, ARGLU1, ARHGEF26, ARL5B, ARMCM3, ASB8, ASH1L, ATP13A3, ATP6AP2, ATP6V1C1, ATXN2L, AVL9, B3GALNT1, B3GALT2, B3GLCT, BAG2, BCAT1, BCL10, BCL11A, BCL2L11, BCL2L2, BICRAL, BMP3, BRAF, BRD3, BRPF3, BTBD7, BTC, C18orf25, C21orf91, C2CD3, C3orf70, C3orf80, C5orf63, C9orf64, CA13, CACNA2D3, CACUL1, CALU, CAMLG, CARF, CAV1, CCB1, CCDC148, CCDC158, CCDC34, CCNA2, CCP110, CD24, CDC5L, CDCA4, CDH7, CDKL5, CDV3, CEPB, CELF4, CHD1, CHD6, CHST9, CKAP5, CLCC1, CLCN3, CLEC12B, CNTNAP2, COA5, COL12A1, CPEB1, CPNE3, CPNE8, CRY1, CSNK1G1, CSPG5, CSRN3, CUL5, CXCL14, CXCL3, CXCL9, CXCR4, CYB5R4, CYBRD1, CYSLTR1, DBT, DCUN1D1, DDX60, DENND1B, DERL1, DESI2, DHRS7, DIPK2B, DKK2, DNAH10, DNAH12, DNAH8, DNAJB4, DNAJC15, DOCK4, DPYS, DSC3, DUSP8, DUT, DYNLC1I2, DYRK3, EBF1, ECPAS, ECT2, EEF1A1, EHMT1, EIF4E3, ELAVL3, ELP4, EMC8, EPB41L5, EPCAM, EPHA7, ERC2, EREG, ERICH2, ERO1B, EYA1, EZH2, FABP7, FAM102B, FAM135A, FAM155A, FAM160A2, FAM160B1, FAM161A, FAM172A, FAM199X, FAM76B, FAM98A, FBXO22, FBXO32, FBXO42, FECH, FKBP5, FLRT3, FLVCR1, FNDC3A, FNIP2, FOXP1, FSTL5, FZD3, FZD6, G0S2, GABRB3, GALNT13, GALNT4, GASK1B, GATA2, GBF1, GDNF, GK, GK5, GNA13, GNAI2,</i> </p> |

|                 |                                                                                                                                                                                                                                                                                                                                                                                                                                                                                                                                                                                                                                                                                                                                                                                                                                                                                                                                                                                                                                                                                                                                                                                                                                                                                                                                                                                                                                                                                                                                                                                                                                                                                                                                                                                                                                                                                                                                                                                                                                                                                                                                                                                                                                                                                                                                                                                                                                                                                                                                                                                                                                                                                                                                                                                                                                                                                                                                                                                                                                                                                                                                                                                                                                                                                                                                                                                                                                                                                                                                                                                    |
|-----------------|------------------------------------------------------------------------------------------------------------------------------------------------------------------------------------------------------------------------------------------------------------------------------------------------------------------------------------------------------------------------------------------------------------------------------------------------------------------------------------------------------------------------------------------------------------------------------------------------------------------------------------------------------------------------------------------------------------------------------------------------------------------------------------------------------------------------------------------------------------------------------------------------------------------------------------------------------------------------------------------------------------------------------------------------------------------------------------------------------------------------------------------------------------------------------------------------------------------------------------------------------------------------------------------------------------------------------------------------------------------------------------------------------------------------------------------------------------------------------------------------------------------------------------------------------------------------------------------------------------------------------------------------------------------------------------------------------------------------------------------------------------------------------------------------------------------------------------------------------------------------------------------------------------------------------------------------------------------------------------------------------------------------------------------------------------------------------------------------------------------------------------------------------------------------------------------------------------------------------------------------------------------------------------------------------------------------------------------------------------------------------------------------------------------------------------------------------------------------------------------------------------------------------------------------------------------------------------------------------------------------------------------------------------------------------------------------------------------------------------------------------------------------------------------------------------------------------------------------------------------------------------------------------------------------------------------------------------------------------------------------------------------------------------------------------------------------------------------------------------------------------------------------------------------------------------------------------------------------------------------------------------------------------------------------------------------------------------------------------------------------------------------------------------------------------------------------------------------------------------------------------------------------------------------------------------------------------------|
|                 | <p>GNL3L, GOLGA3, GOLPH3, GPR137C, GPR183, GRIA2, GRIK2, GRM5, GRTP1, GSK3B, GSPT1, GTF2A2, GTF2H1, GTF3C3, GUCY1B1, HACD4, HECW2, HERC4, HEXIM1, HFM1, HLTF, HNRNPA2B1, HNRNPH3, HNRNPU, HNRNPUL1, HOMER1, HSPE1-MOB4, ICE2, ICK, ID2, ID3, IDH3A, IFNGR2, IGFBP1, IGFBP7, IL22RA2, IL26, IL5RA, IL6ST, ILF3, IMPAD1, INGS, INPP5A, INTS2, IRAK1BP1, IRF1, IRF2BP2, IRX5, IVNS1ABP, JADE3, KANK1, KARS, KAT2B, KATNBL1, KCNN3, KCNQ5, KCNT2, KCTD18, KDSR, KHDC4, KHSRP, KIF5B, KITLG, KLHDC1, KMT5B, KMT5C, KPNA4, LARS, LATS2, LCOR, LDB2, LDB3, LHFPL3, LHX9, LIN54, LMBR1, LNPX, LPAR1, LRCH2, LRIT3, LRP8, LRRC49, LRRN1, LSM8, LUC7L3, LUZP2, LY75, LYRM7, MAF, MAGI3, MAML1, MAP3K20, MAPK1, MARCKSL1, MAST3, MBD2, MBTPS2, MCM6, MCUR1, MDM4, MED13L, MEF2A, MEGF11, MFN1, MFSD14B, MFSD8, MICU3, MID2, MIGA1, MKX, MMS22L, MOB1B, MOB4, MOSPD1, MPP6, MRPL19, MTA1, MTM1, MTURN, MYLIP, MYLK, MYT1L, MZT1, NAA25, NAALADL2, NADK, NADK2, NAGA, NCAM1, NCKAP1, NCL, NCOA3, NECTIN3, NELFA, NEMP2, NEO1, NEURL1B, NF1, NFIB, NOL4L, NOTUM, NPTN, NR2C2, NR4A2, NRARP, NRIP1, NTRK2, NUB1, NUDCD1, NUP205, NXF1, OAZ1, OGFRL1, OGN, OMA1, OSBPL2, OSBPL3, OSBPL6, OSGIN2, OTUD7B, OTULIN, PABPC4, PAFAH1B2, PAK5, PARD3B, PARD6B, PARP12, PCDH15, PCDH20, PCDHB9, PCF11, PCLO, PCNX1, PCYT1B, PDCL, PDE4B, PDSS1, PECR, PELI2, PFKFB4, PHACTR2, PHIP, PHLDB1, PIAS3, PIGK, PKIG, PLAC8, PLCXD3, PLEKHJ1, PLK2, PLOD2, PLPPR4, PLPPR5, PLSCR4, PM20D2, PNISR, POC1B-GALNT4, POLH, POLR2E, POLR2H, POTEF, POU2F1, PPEF2, PPIL4, PPIP5K2, PPM1A, PPM1D, PPP1CC, PPP1R2, PPP1R21, PPP1R27, PPP2R2A, PPP6C, PRDX6, PREX2, PRKAA1, PRKAA2, PRKD3, PRND, PROK2, PROM1, PROSER1, PRPF39, PRRG3, PRRG4, PRTFDC1, PRTG, PSMA2, PSMD11, PSMD5, PTPN2, PTPRE, PTPRG, PTRH1, PVR, PYROXD1, RAB5B, RAB5IF, RAG1, RAI14, RAPH1, RB1CC1, RBM27, RBM39, RBM41, RBM6, RBMS2, RC3H2, RCBTB2, RCHY1, RELCH, REL11, RETREG1, RHBDL2, RHPN2, RIC1, RNF146, RNF212B, RNF8, RPS6KA5, RPS6KA6, RSPH4A, RUNC3B, RUNX1, RUNX2, RWDD4, RXYLT1, SAMD12, SAMD8, SAR1A, SAR1B, SAV1, SCAF4, SCAI, SCAP, SCML1, SCN2A, SCN7A, SCN9A, SDK1, SEC31A, SEC61A2, SEC61B, SERBP1, SERPINE2, SERTAD2, SF3A1, SF3A3, SFMBT1, SFRP5, SGMS1, SH3GLB2, SHISA3, SIM2, SIMC1, SIN3A, SINHCAF, SKI, SLAIN2, SLC11A2, SLC20A2, SLC2A13, SLC30A4, SLC30A7, SLC35D1, SLC35E2A, SLC35F1, SLC35F3, SLC6A15, SLC9B1, SLFN5, SMAD1, SMAD2, SMAD5, SMARCA1, SMARCE1, SMC6, SMG1, SNW1, SNX16, SNX9, SOCS4, SOCS6, SON, SORCS1, SORCS3, SOS2, SOX5, SOX8, SPATA6, SPPL2A, SPRED1, SPRED2, SRSF10, SRSF2, SS18, SSH1, SSH2, SSR1, ST13, STAM, STAT3, STAT5B, STK17B, STK35, STRBP, SUB1, SUMO1, SUMO2, SUPT3H, SYNE3, SYNJ2BP, SYNM, SYT4, TAB3, TAF2, TASOR, TBR1, TCEA1, TCEAL8, TENT2, TENT4B, TFDP3, TGDS, TJP1, TM9SF1, TMA16, TMED7-TICAM2, TMEM127, TMEM150A, TMEM170A, TMEM196, TMEM206, TMEM56, TMEM67, TMEM68, TMEM87A, TMPO, TMPPRSS11D, TNFAIP6, TNRC6B, TNRC6C, TOB2, TOLLIP, TOX, TOX3, TPGS2, TPST2, TRAK2, TRIM36, TRIM65, TRIO, TRIP11, TRPM7, TRPM8, TRPS1, TSHZ1, TSPAN2, TSPAN9, TTC14, TTC28, TTC3, TTC30A, TTC32, TUBE1, TULP4, TUSC3, TUT4, TUT7, TWLF1, TWSG1, TXN, UBE2B, UBE2D1, UBE2H, UBE2K, UBE4A, UBQLN1, UBR2, UBR5, UNC5D, UNK, USF3, USH2A, USP12, USP24, USP44, USP46, USP9X, UTP25, VCAN, VEZF1, VIM, VWC2, WDR26, WIZ, WWTR1, XPO4, XPOT, XPR1, XRN1, YAP1, YES1, YTHDC2, YTHDF1, YTHDF2, YWHAQ, ZBTB2, ZBTB25, ZBTB6, ZCCHC18, ZCCHC3, ZCCHC8, ZDHHC20, ZDHHC3, ZFAND4, ZFC3H1, ZHX1, ZMYM3, ZNF112, ZNF236, ZNF322, ZNF326, ZNF34, ZNF362, ZNF423, ZNF503, ZNF678, ZNF713, ZNF714, ZNF737</p> |
| hsa-miR-1246    | <p>DDX3X, MIER3, ANTXR2, GMFB, SLC12A2, TAF9B, ESM1, RTKN2, SCEL, SLC38A2, ADAM22, DYRK1A, EIF2AK3, GPR85, KDM5A, KLHL14, MYOT, NDFIP1, RAB14, REPS2, SORBS2, ACE2, ADAT2, ANKDD1B, ATP2B1, C12orf71, C15orf53, CDO1, COL6A6, CREBL2, DLG1, DUSP18, DYNC1I1, ELF5, FAM45A, FAM53C, FPGT, GLRB, HECTD2, HLF, HTR5A, ISCA1, LYPD1, MIER1, MRPS14, PANX1, PLEKH2, SCN3A, SEPHS1, SHISA9, TBCK, TNFRSF8, ZCCHC14, ZNF425</p>                                                                                                                                                                                                                                                                                                                                                                                                                                                                                                                                                                                                                                                                                                                                                                                                                                                                                                                                                                                                                                                                                                                                                                                                                                                                                                                                                                                                                                                                                                                                                                                                                                                                                                                                                                                                                                                                                                                                                                                                                                                                                                                                                                                                                                                                                                                                                                                                                                                                                                                                                                                                                                                                                                                                                                                                                                                                                                                                                                                                                                                                                                                                                           |
| hsa-mir-125a    | <p>NUFIP2, ZNF704, CREB1, DACH1, LARP4, PEAK1, TAOK1, BNC2, FXR1, KDM4A, MAPK9, SGK1, ACP, CHIC1, CPNE4, KLF9, MAP3K12, MAPK10, NLK, NSG2, RGS7BP, ANKRD45, ARL1, BAZ2A, BOK, BRCA1, CCDC178, CERS5, CHGB, CNOT4, CPA3, CUX2, CYB561D1, DHX57, DTWD1, EMC1, FUT6, GLG1, GMNC, GPRC5A, HEYL, HTR4, IFIT2, IGF2BP2, INHBC, INMT, ITGAV, JMJD8, KRTAP1-1, LAIR1, LIMD1, MAB21L2, MEAF6, MTAP, MTRF1, NARS, NIT1, OVOL1, OXLD1, PCDH8, PGM3, POP1, PRDM5, PRKAG1, PTCH1, RNF185, S100A7A, SEC14L2, SLC9A7, STAP1, TDRP, THUMP3, VPS39, WDFY2, ZNF287</p>                                                                                                                                                                                                                                                                                                                                                                                                                                                                                                                                                                                                                                                                                                                                                                                                                                                                                                                                                                                                                                                                                                                                                                                                                                                                                                                                                                                                                                                                                                                                                                                                                                                                                                                                                                                                                                                                                                                                                                                                                                                                                                                                                                                                                                                                                                                                                                                                                                                                                                                                                                                                                                                                                                                                                                                                                                                                                                                                                                                                                               |
| hsa-miR-125a-5p | <p>ATXN1, INO80D, ZNF704, BNIP2, CBFB, CCNJ, DICER1, ETS1, GJC1, NRXN1, SEL1L, TAF9B, UBE2R2, BAP1, BTG2, DAAM1, DENND6A, EIF2B5, HAPLN1, KIAA1841, LCLAT1, MBOAT2, PHACTR3, PI4K2B, PRDM1, RBM7, RORA, SLC4A4, SYVN1, TRAF6, TTPA, ZSWIM4, ABHD3, ANAPC16, ANKRD50, BAG4, BAK1, BMF, C6orf47, CDK19, DIRAS1, DTX4, GGA2, GRB10, IGSF11, KCNA1, KCNK10, KIAA0319L, MAP3K11, MAPRE2, MCL1, MTF1, ORC2, PPAT, PRRC1, RAP1A, RBAK, REST, RFX3, RHOQ, RYBP, SEMA4C, SH3BP5L, SLC25A15, SLC39A9, SNX18, SRF, TDG, TMEM120B, TMEM135, TNFAIP3, UBN1, ZBTB7A, ZNF652, ZNRF3, ABHD6, ABTB1, ACER2, ACHE, AIFM1, ALPK3, ANKRD33B, ARID3B, ASIC1, ATP10D, BLZF1, C19orf38, C1orf210, CACNB3, CDC37L1, CDC42BPG, CDC42SE1, CDH5, CDR2L, CEP85, CGN, CHTF8, CPSF6, CRB2, CYP24A1, DHX33, DIS3L2, DOCK3, DPH2, DRAM2, DUS1L, DUSP6, E2F2, EBF4, EIF1AD, EIF4EBP1, ENPEP, ENPP1, ESRRA, EVA1A, FAM118A, FAM169B, FBXW4, FRMD5, FUT4, GALNT14, GCNT1, GOLGA5, HCN3, HIC2, HIF1AN, HINFP, IER2, IER3IP1, IL16, IL6R, INTS7, IRF4, IST1, ITGA8, KCNIP3, KCNS3, KCTD15, KCTD21, KHNYN, KIAA1522, KLC2, KLF13, LBH, LFNG, LGI2, LIN28A, LIN28B, LIPA, LRP4, LRRC10B, LRRC8B, M6PR, MAMDC2, MAN1B1, MAP3K10, MAP3K9, MAPK12, MFHAS1, MFSD9, MKNK2, MMP11, MORC2, MSI1, MSRB3,</p>                                                                                                                                                                                                                                                                                                                                                                                                                                                                                                                                                                                                                                                                                                                                                                                                                                                                                                                                                                                                                                                                                                                                                                                                                                                                                                                                                                                                                                                                                                                                                                                                                                                                                                                                                                                                                                                                                                                                                                                                                                                                                                                                                                                                                                                                                                                      |

|                 |                                                                                                                                                                                                                                                                                                                                                                                                                                                                                                                                                                                                                                                                                                                                                                                                                                                                                                                                                                                                                                                                                                                                                                                                                                                                                                                                                                                                                                                                                                                                                                                                                                                                                                                                                                                                                                                                                                                                                                                                                                                                                                                                                                                                                                                                                                                                                                                                                                                                                                                                                                                                                                                                                                                                                                                                                                                                                                                                                    |
|-----------------|----------------------------------------------------------------------------------------------------------------------------------------------------------------------------------------------------------------------------------------------------------------------------------------------------------------------------------------------------------------------------------------------------------------------------------------------------------------------------------------------------------------------------------------------------------------------------------------------------------------------------------------------------------------------------------------------------------------------------------------------------------------------------------------------------------------------------------------------------------------------------------------------------------------------------------------------------------------------------------------------------------------------------------------------------------------------------------------------------------------------------------------------------------------------------------------------------------------------------------------------------------------------------------------------------------------------------------------------------------------------------------------------------------------------------------------------------------------------------------------------------------------------------------------------------------------------------------------------------------------------------------------------------------------------------------------------------------------------------------------------------------------------------------------------------------------------------------------------------------------------------------------------------------------------------------------------------------------------------------------------------------------------------------------------------------------------------------------------------------------------------------------------------------------------------------------------------------------------------------------------------------------------------------------------------------------------------------------------------------------------------------------------------------------------------------------------------------------------------------------------------------------------------------------------------------------------------------------------------------------------------------------------------------------------------------------------------------------------------------------------------------------------------------------------------------------------------------------------------------------------------------------------------------------------------------------------------|
|                 | <p>MXD4, MYO18A, MYT1, NBEAL2, NCAN, NCKAP5L, NCOR2, NECAB3, NEU1, NIPA1, NIPAL4, NPL, NR6A1, NT5DC1, NUP210, OLFML2A, OSBPL9, PAFAH1B1, PCTP, PDE7A, PDK3, PHF20, PLEKHA8, PLEKHM3, PMM2, PPME1, PPP1R37, PPP2R5C, PRSS35, QSOX2, RAB3D, RABEP2, RAPGEF5, RASGEF1A, RASGRF1, RASGRF2, RASSF3, RBM20, RFXANK, RPS6KA1, RREB1, RUFY3, SAMD10, SARM1, SBNO1, SCARB1, SCLY, SCN2B, SEMA4B, SEMA4D, SEMA4F, SERTAD3, SGPL1, SH3TC2, SLC16A6, SLC25A35, SLC26A6, SLC35A4, SLC38A9, SLC46A3, SLC6A17, SLC7A1, SLITRK6, SMURF1, SSTR3, STARD13, SULT4A1, SUN1, SUV39H1, TAZ, TBC1D1, TBC1D16, TBX4, TLE3, TMEM132E, TMEM161B, TMEM168, TMTC2, TNFSF4, TOMM40, TOR2A, TRIAP1, TRIM71, TSEN54, TSNARE1, TTC7A, UBE2G1, UBR7, UCK2, ULK3, USP2, USP38, VCP1P1, VDR, VPS36, VPS4B, VTCN1, WARS, XKRX, ZBTB37, ZFYVE1, ZKSCAN5, ZNF385A, ZNF691, ZNF827, ZSCAN29, ZSWIM5, ZSWIM6</p>                                                                                                                                                                                                                                                                                                                                                                                                                                                                                                                                                                                                                                                                                                                                                                                                                                                                                                                                                                                                                                                                                                                                                                                                                                                                                                                                                                                                                                                                                                                                                                                                                                                                                                                                                                                                                                                                                                                                                                                                                                                                           |
| hsa-miR-143-3p  | <p>INO80D, CBF8, GLI3, GXYLT1, PTPN4, SECISBP2L, SMNDC1, VASH1, COL25A1, DIP2B, FNDC3B, FSCN1, HIPK2, HTR2C, KRT80, LRP12, NFATC1, PPM1E, SIX4, SLC38A2, SRSF11, TRAPPC8, TTPA, WWC3, ADD3, AKAP13, COL1A1, COL5A3, EPM2AIP1, ETV6, FR52, GABARAPL1, KCNK10, MS12, MYBL2, MYO6, PAN3, SH3PXD2A, SLC16A2, SLC25A15, SLC7A11, ST8SIA4, STRN3, TET1, UBXLN2B, ZBTB44, ABHD14A, ABHD17B, ABL2, AFF1, AHCYL1, ARHGAP26, ASAP3, ATP10A, ATP6V1A, BRD2, CACHD1, CACNA1A, CHST10, CPD, CRELD1, EFS, EXOC6B, FADS6, FAM117A, FAR1, FBXO46, FGF1, FGF9, FNDC5, FOSL2, GDF10, GIGYF2, GOLM1, IGFBP5, ITGB8, ITM2B, KCND1, KIF3B, KRAS, LIMK1, LMO4, MAB21L1, MAP3K7, MAPK7, MEDAG, MOGS, NECAP1, NPR3, NUA2K, PC, PDIA6, PHF6, PSME4, RAB11FIP1, RBM24, SCAMP4, SLC30A8, SLC39A11, SLC4A8, SOBP, STAC, STOX2, SVIL, SYT3, THRB, TM2D2, TSHR, TUB, UBE2E3, VAPB, ZNF583</p>                                                                                                                                                                                                                                                                                                                                                                                                                                                                                                                                                                                                                                                                                                                                                                                                                                                                                                                                                                                                                                                                                                                                                                                                                                                                                                                                                                                                                                                                                                                                                                                                                                                                                                                                                                                                                                                                                                                                                                                                                                                                                    |
| hsa-mir-143-5p  | <p>DDX3X, MIER3, SESN3, CASK, MAP3K2, SATB1, STRN, ARID4B, CSORF24, ESRRG, GLCE, LARP4, MMD, PTPN4, RAP2C, RC3H1, ASF1A, CDK14, FAM126A, FEZ2, HIPK2, KBTBD2, NELL2, PTHLH, RAPGEF6, RBPJ, RORA, SCN5A, SIX4, TOPORS, USP14, ZC3H12C, ZFP36L1, ZNF626, ZNF780B, ABCG2, ABHD10, ARL8B, DYRK1A, ELAVL4, EOGT, GPR85, HAS3, IKZF2, KDM2B, KIAA0319L, KPNA1, MAP3K11, MAP3K12, PRPF4B, RAD21, RHOQ, SKIDA1, SLC7A2, SPTBN1, TFDPI, VSNL1, ZNF138, ZNRF2, ADRB1, ANKRD11, BSPRY, BTBD2, BTN2A2, C12orf4, CADPS, CARD10, CDK12, CITED2, CORO2A, CRYBG3, DPH3, EMC2, ERP27, ESYT1, FAM111B, FAM81A, FMR1, G3BP2, GLRA2, HBS1L, HIF1A, HMGA2, ISL1, KCNJ2, LAMP1, LAPTM4A, LRCH1, MAP3K4, MAT2A, MKKS, MR1, NPLOC4, NPNT, NUA1K, PDS5A, PDX1, POLR3D, PPP2CA, RAB12, RALGPS1, RNF44, SACS, SGC2, SNX3, STMN1, SUMF1, TAX1BP1, TBPL1, TEAD1, TEK2, TFB1M, THRA, THY1, TMEM260, TPPP, TTC38, UBE2Q2, VWC2L, WBP11, ZBTB18, ZNF460, ZNF85</p>                                                                                                                                                                                                                                                                                                                                                                                                                                                                                                                                                                                                                                                                                                                                                                                                                                                                                                                                                                                                                                                                                                                                                                                                                                                                                                                                                                                                                                                                                                                                                                                                                                                                                                                                                                                                                                                                                                                                                                                                                 |
| hsa-miR-200b-3p | <p>NUFIP2, PRKG1, BRWD3, FSTL1, MBNL3, PTAR1, SESN3, ATL2, ATXN1, CAB39, CAMSAP2, CNOT6, CTDSPL2, DGKH, EGLN1, ELL2, FOXN2, FRMD4B, GPM6A, NFIA, PPP1R9A, SLC4A7, STRN, TMEFF2, VEGFA, WIPF1, ZFX, AGFG1, ANK3, ARID4B, CCNJ, CDH20, CEP350, CEP97, CHN2, CLASP1, CYTH1, CYTH3, DACH1, DNMT3B, ESRRG, ETS1, FBXO30, GJC1, GLI3, GOLGA7, GPR158, GXYLT1, IMMP2L, KLF4, LRP1B, MAP4K3, MIB1, MMD, NOVA1, PDS5B, PHTF2, PIK3CA, PPP2R5E, RAP2C, REEP1, RPS6KA3, SDC2, SECISBP2L, SGCE, TBC1D12, TMX4, TRIM33, UBE2R2, ULK2, VASH1, ZC3H6, ZEB1, ACVR1C, ARL5A, ATAD2B, ATP11C, ATP6V0A2, BAP1, BCL11B, BNC2, C11orf87, C16orf72, CCNYL1, CHSY1, CKAP4, CLASP2, COPS8, CORO1C, CPED1, DNAJB14, DTNA, EFN2B, EIF2B5, ELAVL2, EVI5, FAT3, FBXO33, FBXW7, FERMT2, FEZ2, FNDC3B, FSCN1, GIT2, GNAQ, HIPK1, HIPK3, HMBOX1, HOOK1, JAZF1, KDELC1, KHDRBS1, KLF6, KRT80, LOX, MAP3K1, MAP4K4, MAPRE1, MBOAT2, MED13, MEX3D, NOTCH1, NOVA2, OCLN, OSBPL11, OTUD4, OXR1, PAG1, PDIK1L, PHACTR3, PI4K2B, PLXNC1, PPPIA1, PRDM1, PRKACB, PTHLH, PTPN14, PUM2, QKI, RBFOX2, RDH10, RND3, RNF2, RPS6KB1, SCAMP1, SCN5A, SGIP1, SLC39A14, SMARCD1, SPAG9, SUZ12, SYVN1, TBL1XR1, TMOD3, TRAPPC8, TSC22D2, UBE2W, USP25, USP6NL, WASF3, WWC3, XKR4, ZC3H4, ZEB2, ZMAT3, ZSWIM4, A1CF, ADAMTS3, ADIPOR2, AFF3, AMFR, AP1S2, APOO, ARHGAP20, ARHGAP6, ARIH1, ARL2BP, ASAP1, B3GNT2, BDP1, BICC1, CASR, CASZ1, CBL, CBX4, CCDC177, CCDC82, CDH11, CDK17, CDYL, CDYL2, CECR2, CEP41, CEP85L, CFL2, CHMP5, CHRDL1, CLIC4, CLIP1, CNEP1R1, CNKSR3, COL4A3BP, CRKL, CRTAP, CSMD3, CSNK1G3, DCBLD2, DENND5B, DESI1, DGKA, DIXDC1, DLC1, DNAJB5, DNAJB9, DNAJC3, DPY19L1, DUSP1, DZIP1, ELK3, ELK4, ELMOD2, EPS8, ERG, ERFF1, FAM118B, FAM8A1, FARP1, FIGN, FLI1, FLII, FN1, FOXF1, FOXG1, FRMD6, GABBR2, GATA4, GLCCI1, GOLGA1, GPATCH8, HDHD2, HMGB3, HNRNP, HS2ST1, HS3ST1, HS3ST3A1, HSPA13, IER5, IGF2R, INTS8, JAKMIP2, JKAMP, JUN, KANK2, KCND2, KDR, KIAA0355, LBR, LRP1, LRRC8A, MAP2, MARCH6, MARCKS, MATR3, MCFD2, MFAP5, MGAT2, MIEF1, MPRIIP, MSL2, MSN, MTF2, MTSS1L, MYB, MYZAP, NAB1, NANOS1, NBR1, NCOA2, NCS1, NEDD1, NOG, NPC1, NR3C1, NR5A2, NRBP1, NRG1, NTF3, NUDT4, NYAP1, OSTM1, PCDH19, PCMTD1, PHF21B, PI4KB, PIKFYVE, PITPNM3, PKD1, PKIA, PLCL1, PMAIP1, POLK, PPM1F, PPP1R10, PPP1R18, PPP1R9B, PPP4R2, PRDM16, PSAT1, PSIP1, PTPN12, PTPN21, RAB11FIP2, RAB21, RANBP10, RANBP9, RAP1B, RASA2, RASSF8, RBFOX3, RECK, RGL1, RIMS2, RIPK2, ROCK2, RTF1, RUSC2, S100BP, SBSPO, SCD, SCN8A, SCRT2, SEC23A, SEMA3F, SEMA6D, SERINC1, SERPINI1, SESN1, SFXN1, SIX1, SLC14A1, SLC1A2, SLC24A4, SLC35E2B, SLC6A1, SLC6A11, SLIT2, SLITRK1, SLK, SOX2, SRGAP1, SULF1, SYDE1, SYNJ1, TAF12, TBK1, TCAIM, TFAP2A, THAP1, TIMP2, TLN1, TLN2, TMEM136, TMEM164, TMEM17, TOB1, TRHDE, TSC22D1, TUBB, UHRF1BP1, USP27X, VASH2, VAT1L, VLDLR, WASF1, WDR82, XKR8, YPEL2, YWHAB, YWHAG, ZBTB38, ZCCHC24, ZFAND6, ZFPM2, ZNF131, ZNF217, ZNF532, ZNF711, ZYG11B</p> |



|                 |                                                                                                                                                                                                                                                                                                                                                                                                                                                                                                                                                                                                                                                                                                                                                                                                                                                                                                                                                                                                                                                                                                                                                                                                                                                                                                                                                                                                                                                                                                                                                                                                                                                                                                                                                                                                                                                                                                                                                                                                                                                                                                                                                                                                                                                                                                                                                                                                                                                                                        |
|-----------------|----------------------------------------------------------------------------------------------------------------------------------------------------------------------------------------------------------------------------------------------------------------------------------------------------------------------------------------------------------------------------------------------------------------------------------------------------------------------------------------------------------------------------------------------------------------------------------------------------------------------------------------------------------------------------------------------------------------------------------------------------------------------------------------------------------------------------------------------------------------------------------------------------------------------------------------------------------------------------------------------------------------------------------------------------------------------------------------------------------------------------------------------------------------------------------------------------------------------------------------------------------------------------------------------------------------------------------------------------------------------------------------------------------------------------------------------------------------------------------------------------------------------------------------------------------------------------------------------------------------------------------------------------------------------------------------------------------------------------------------------------------------------------------------------------------------------------------------------------------------------------------------------------------------------------------------------------------------------------------------------------------------------------------------------------------------------------------------------------------------------------------------------------------------------------------------------------------------------------------------------------------------------------------------------------------------------------------------------------------------------------------------------------------------------------------------------------------------------------------------|
| hsa-miR-200b-5p | <p><b>MIER3, AHR, NFIA, KLF12, AMMECR1, ATP6V0A2, COPS8, EID1, EPHA5, HCFC2, PPM1E, SGK1, ZC3H12C, ARL13B, BBX, CRLF3, EPM2AIP1, KCTD12, KDM2B, KMT2E, LIMCH1, MDFIC, NAMPT, NDFIP1, NDFIP2, NSG2, ORC2, PAPOLG, SHPRH, SP3, UBR3, ZNF138, ZNF254, AGPAT5, ALX4, ARC, ASNSD1, ATAD2, ATG10, ATL3, BTBD1, C11orf53, C18orf54, CHD7, CRIM1, DNAJC27, EIF1AX, EIF4ENIF1, ETFDH, FGF13, FOXC1, FOXD1, GOLGA7B, GRHL1, HAUS6, HIVEP3, HOXA10, HPDL, IFT52, INSIG2, KIAA1217, KLF7, KLHL5, LMTK2, LRRC57, MOBP, MYBL1, NCF2, NR4A1, PCDHB6, PKP2, PPRC1, RAB11B, RAB1A, RANBP3, RUFY2, SCOC, SEMA3E, SERINC3, SH3RF1, SLC22A15, SLC25A40, SNX4, SULT1C2, THAP5, TIAM2, TMEM39A, TXNDC17, TXNRD3, USP53, ZNF208, ZNF367, ZNF440, ZNF493, ZNF675, ZNF763, ZNF770, ZNF91, ZNF99</b></p>                                                                                                                                                                                                                                                                                                                                                                                                                                                                                                                                                                                                                                                                                                                                                                                                                                                                                                                                                                                                                                                                                                                                                                                                                                                                                                                                                                                                                                                                                                                                                                                                                                                                                                         |
| hsa-miR-203a-3p | <p><b>NUFIP2, PRKG1, ZBTB20, MBNL3, AHR, ANTXR2, CAB39, CASK, DGKH, ELL2, MAP3K2, RFX7, CADM2, EIF5A2, GUCY1A2, GXYLT1, HOOK3, MBNL2, MYEF2, OSBPL8, PDE4D, PIK3CA, PTP4A1, ROBO2, SLC12A2, THSD7A, TNPO1, YTHDF3, AFF4, ARHGAP42, CDH10, COPS7B, CREBRF, DDX6, DENND6A, DIP2B, DNAJB14, EIF4E, FAT3, GPR180, KHDRBS1, MAP3K1, PRICKLE2, RAB10, RTKN2, SGMS2, SLC4A4, SLC7A14, TCF4, TRPV3, ABCE1, ACVR2A, ADAMTS17, ADK, BBX, CLOCK, COL4A4, CSRN2, DCP2, DLX5, EGR3, ETV1, FAM126B, GABARAPL1, GABRA1, KIAA1211, MED14, MSI2, NEDD4L, NLK, NUDT21, PAQR3, PDAP1, PEX5L, PHLDA1, PRKCB, PRKCI, ROBO1, SESTD1, SGTB, SLC39A9, SPARC, VAPA, VSNL1, ZMIZ1, ZNF148, ZNF608, ACO2, ADAMTS5, ANKRD52, ATF2, ATG14, BCL7A, C11orf91, CNM3, COL17A1, CSN2, DGKB, DLG5, DR1, DUSP5, E2F3, ETS2, FAM84A, FOXK1, FUBP3, GPATCH1, GRHL3, HNRNPUL2, ID4, IL24, INSIG1, KAT6A, KIF2A, KRT1, KRT35, KRT85, LNX2, MAPK8, MBNL1, MCTP1, MCTS1, MICAL2, NAA30, NEMF, NFIL3, NR1D2, NSG1, OPA1, PAPSS2, PDGFD, PHF12, PLD1, PPP1R12A, PRPS2, PTPN3, RAB27B, RAPGEF1, RASAL2, RBM47, SCGB2A1, SEC62, SEMA3A, SEMA5A, SMC5, SNAI2, SNB2, SP4, SRA1, SRC, TADA2B, TARDBP, TEDDM1, TFDP2, TMEM100, TMEM69, TNFSF15, TTC39A, UBR1, UPF2, USP8, WDR37, XRN2, YAF2, ZNF197, ZNF281</b></p>                                                                                                                                                                                                                                                                                                                                                                                                                                                                                                                                                                                                                                                                                                                                                                                                                                                                                                                                                                                                                                                                                                                                                                                                                      |
| hsa-mir-203a-5p | <p><b>WIPF1, MAP4K3, ZC3H6, BTG2, CREBRF, CSGALNACT2, DIP2B, DTNA, KBTBD2, PPFIA2, PTPN14, TSC22D2, ABHD3, APAF1, C1QTNF6, CNOT6L, ELOVL5, EPC1, FRAS1, JAG1, LASP1, NT5E, PHLDA1, UBE2D3, ZNRF3, AARS, ABCC4, ABHD12B, ANKRD44, ARMC1, CCDC113, CCER1, CCL2, CCNG1, CDH6, CDKL1, CDKL2, COLQ, FAM102A, GRASP, IGF1R, KLF11, KRIT1, MEX3C, MICAL3, NBP1, PFKFB3, PPTC7, RNF11, SH3BGR1, TBP, TUBD1, ZBTB4, ZNF800</b></p>                                                                                                                                                                                                                                                                                                                                                                                                                                                                                                                                                                                                                                                                                                                                                                                                                                                                                                                                                                                                                                                                                                                                                                                                                                                                                                                                                                                                                                                                                                                                                                                                                                                                                                                                                                                                                                                                                                                                                                                                                                                              |
| hsa-mir-219b    | <p><b>FOXN2, SATB1, ESRRG, PEAK1, PHTF2, ZFH3, ALCAM, CSGALNACT2, NAV1, RSRG1, UNC5C, YOD1, ABHD10, ECHDC1, EFR3A, EOMES, KLF5, NEUROD1, PAQR3, PLEC, PRKAR2B, SLC6A14, SOX21, TENM1, UBN1, ZIC3, ZNF254, ARHGAP28, CAMK1D, CLEC4E, DPP10, EPHA4, EPHB1, FMNL2, FNBP4, GEMIN2, GJB7, GRID2, IBTK, IPO5, IQGAP2, KRTAP6-3, MPZ, OGFOD1, PACRG, RAB6A, SAMD13, SAMD9, SOD3, STAR, TCP1, TNFSF13B, ZNF561</b></p>                                                                                                                                                                                                                                                                                                                                                                                                                                                                                                                                                                                                                                                                                                                                                                                                                                                                                                                                                                                                                                                                                                                                                                                                                                                                                                                                                                                                                                                                                                                                                                                                                                                                                                                                                                                                                                                                                                                                                                                                                                                                         |
| hsa-mir-29c     | <p><b>HEBP2, RPA3, TCEA3, TMEM98</b></p>                                                                                                                                                                                                                                                                                                                                                                                                                                                                                                                                                                                                                                                                                                                                                                                                                                                                                                                                                                                                                                                                                                                                                                                                                                                                                                                                                                                                                                                                                                                                                                                                                                                                                                                                                                                                                                                                                                                                                                                                                                                                                                                                                                                                                                                                                                                                                                                                                                               |
| hsa-miR-29c-3p  | <p><b>PRKG1, ZBTB20, BRWD3, DDX3X, FSTL1, ANTXR2, CAMSAP2, DGKH, NFIA, RFX7, VEGFA, ZFX, ZNF704, CCNU, CCNT2, CEP97, COL19A1, DICER1, DNMT3B, GAB1, KLF4, PGAP1, RNF138, STX16, TMEM65, USP37, VASH1, ZMYM2, ANKRD13C, ATAD2B, BTG2, C16orf72, CCNYL1, CCSER2, CHSY1, CMPK1, CNR1, COL25A1, COL4A1, CSGALNACT2, DAAM1, DCAF7, DENND6A, EML5, FAM168B, FBXW7, FERMT2, GNB4, GPATCH2, IL1RAP, IREB2, JAZF1, KDELC1, LOX, MAP4K4, MAPRE1, MYCN, N4BP2L1, NAV1, NFAT5, NPAS3, OTUD4, PAIP2, PDIK1L, PPM1E, RNF19A, SGK1, SGMS2, SH3GLB1, SP1, TCF4, TMOD3, USP34, USP6NL, XKR4, ZBTB10, ZFP36L1, ABCE1, ADAMTS17, AKAP13, ANKRD27, ARPP19, BACH2, BAK1, BMF, C1QTNF6, CAMK4, CDC42BPA, CDK6, COL11A1, COL1A1, COL4A4, COL5A3, CPB3, CSRN2, DCUN1D4, DCX, DLG2, DTWD2, DTX4, ELMSAN1, EOMES, EPC1, ETV6, FGD4, FRAS1, GRIP1, HAS3, HDAC4, KCTD5, LASP1, MAPK10, MAPRE2, MBTD1, MCL1, MYBL2, NOTCH2, NREP, PAN2, PAPOLG, PCDHA1, PCDHA10, PCDHA11, PCDHA12, PCDHA13, PCDHA2, PCDHA3, PCDHA4, PCDHA5, PCDHA6, PCDHA7, PCDHA8, PCDHAC1, PCDHAC2, PMP22, PRR14L, PRR3, PRRC2C, PTBP3, PTPRK, RAB30, RAP1A, RBAK, REPS2, RERE, REST, ROBO1, SESTD1, SH3BP5L, SH3PXD2A, SHPRH, SIRT1, SLC6A14, SMIM17, SMPD3, SPARC, STX17, TDG, TET1, TFAP2C, TLL1, TMEM236, TNFAIP3, TNRC18, ZMIZ1, ADAMTS10, ADAMTS2, ADAMTS7, ADAMTS9, AKAP5, AKT3, AMER1, AMMECR1L, ANKRD13B, ARHGEF10, ARVCF, ASAP2, ASXL3, ATP1B4, ATP2B4, ATRN, B3GNT5, BCORL1, BLMH, CSORF15, CAV2, CBX6, CCSAP, CD276, CDC42, CLDN1, CLEC2L, COL15A1, COL1A2, COL22A1, COL27A1, COL2A1, COL3A1, COL4A2, COL4A5, COL4A6, COL5A1, COL5A2, COL6A3, COL7A1, COL9A1, CPS1, CPSF7, CREB5, CRISPLD1, CUEDC1, DAAM2, DIO2, DNMT3A, DOLPP1, DOT1L, DPYSL3, DPYSL5, DYNLT1, EFNA5, EIF3J, EIF4E2, ELF2, ELN, ELOVL4, EML4, EML6, ENHO, ENPP2, ERCC6, ERLIN2, ERP44, FAM13B, FAM167A, FAM57B, FBN1, FBXW9, FEM1B, FOXJ2, FRAT2, FREM2, GID8, GNG12, GPCPD1, GPR37, GPX7, GXYLT2, HAPLN3, HBEGF, HBP1, HIF3A, HMCN1, HRK, HS3ST3B1, ICOS, IFFO1, IFI30, IGF1, INA, ING2, IQCJ-SCHIP1, ISG20L2, JARID2, JMY, KCTD20, KDM4B, KDM5B, KIAA0895, KIAA1549, KIF26A, KIF26B, KLHL28, KNOP1, LAMA2, LAMC1, LDLRAD3, LIF, LIN7A, LOXL2, LOXL4, LPL, LSM11, LYSMD1, MAPKBP1, MARCH1, MED12L, METAP2, MEX3B, MFAP3, MGA, MLXIP, MOB1A, MORF4L1, MTMR4, MXD1, NAPB, NASP, NAV2, NAV3, NCKAP5, NKIRAS2, NKRIF, NLRX1, NSD1, NUP160, OSTC, PALM, PARG, PCDHA9, PCGF3, PCSK5, PGAP2, PI15, PIK3R1, PLP1, PPIC, PPP1R13B, PPP1R15B, PRKAB2, PRKRA, PRPF40A,</b></p> |

|                |                                                                                                                                                                                                                                                                                                                                                                                                                                                                                                                                                                                                                                                                                                                                                                                                                                                                                                                                                                                                                                                                                                                                                                                                                                                                                                                                                                                                                                                                                                                                                                                                                                                                                                                                                                                                                                                                                                                                                                                                                                                                                                                                                                                                                                                                                                                                                                                                                                                                                                                                                                                                                                                                                                                                                                                                                                                                                                                                                                                               |
|----------------|-----------------------------------------------------------------------------------------------------------------------------------------------------------------------------------------------------------------------------------------------------------------------------------------------------------------------------------------------------------------------------------------------------------------------------------------------------------------------------------------------------------------------------------------------------------------------------------------------------------------------------------------------------------------------------------------------------------------------------------------------------------------------------------------------------------------------------------------------------------------------------------------------------------------------------------------------------------------------------------------------------------------------------------------------------------------------------------------------------------------------------------------------------------------------------------------------------------------------------------------------------------------------------------------------------------------------------------------------------------------------------------------------------------------------------------------------------------------------------------------------------------------------------------------------------------------------------------------------------------------------------------------------------------------------------------------------------------------------------------------------------------------------------------------------------------------------------------------------------------------------------------------------------------------------------------------------------------------------------------------------------------------------------------------------------------------------------------------------------------------------------------------------------------------------------------------------------------------------------------------------------------------------------------------------------------------------------------------------------------------------------------------------------------------------------------------------------------------------------------------------------------------------------------------------------------------------------------------------------------------------------------------------------------------------------------------------------------------------------------------------------------------------------------------------------------------------------------------------------------------------------------------------------------------------------------------------------------------------------------------------|
|                | <p>PTEN, PXDN, RAP1GDS1, RAPGEF1, RARB, REL, REV3L, RHOB1, RLF, RMND5A, RNF39, SAMD4A, SCML2, SENP1, SERINC5, SERPINH1, SETDB1, SETDB2, SH3PXD2B, SHROOM2, SIDT1, SIDT2, SLC16A14, SLC30A3, SLC5A8, SLC7A6, SMS, SMTNL2, SNX24, SS18L1, STMN2, STRN4, TAF11, TAF5, TET2, TET3, TFEB, TFEC, TIMM8B, TMEM169, TMEM178B, TMEM183A, TMT3C, TNFRSF1A, TPK1, TRAF3, TRAF4, TRIB2, TRIM63, TTC9, TUBB2A, UBE2D, VPS37C, WBP1L, WDFY1, XKR6, XKR7, YBX3, ZBTB34, ZBTB5, ZDHHC21, ZFP91, ZHX3, ZNF282, ZNF469, ZNF512B</p>                                                                                                                                                                                                                                                                                                                                                                                                                                                                                                                                                                                                                                                                                                                                                                                                                                                                                                                                                                                                                                                                                                                                                                                                                                                                                                                                                                                                                                                                                                                                                                                                                                                                                                                                                                                                                                                                                                                                                                                                                                                                                                                                                                                                                                                                                                                                                                                                                                                                             |
| hsa-miR-375-3p | <p>ZBTB20, ATXN7, DIP2C, POU3F1, QKI, RBPJ, SPAG9, ELAVL4, KLF5, SLC16A2, ZFP36L2, CREBZF, HNF1B, NFIX, PLEKHA3, SOCS5, TSC1, UBE3A</p>                                                                                                                                                                                                                                                                                                                                                                                                                                                                                                                                                                                                                                                                                                                                                                                                                                                                                                                                                                                                                                                                                                                                                                                                                                                                                                                                                                                                                                                                                                                                                                                                                                                                                                                                                                                                                                                                                                                                                                                                                                                                                                                                                                                                                                                                                                                                                                                                                                                                                                                                                                                                                                                                                                                                                                                                                                                       |
| hsa-miR-429    | <p>NUFIP2, PRKG1, ZBTB20, BRWD3, FSTL1, MBNL3, PTAR1, SESN3, ATL2, ATXN1, CAB39, CAMSAP2, CNOT6, CTDSP2, DGKH, EGLN1, ELL2, FOXN2, FRMD4B, GPM6A, NFIA, PPP1R9A, SLC4A7, STRN, TMEFF2, VEGFA, WIPF1, ZFX, AGFG1, ANK3, ARID4B, CCN1, CDH20, CEP350, CEP97, CHN2, CLASP1, CYTH1, CYTH3, DACH1, DNMT3B, ESRRG, ETS1, FBXO30, GJC1, GLI3, GOLGA7, GPR158, GXYLT1, IMMP2L, KLF4, LRP1B, MAP4K3, MIB1, MMD, NOVA1, PDS5B, PHTF2, PIK3CA, PPP2R5E, RAP2C, REEP1, RPS6KA3, SDC2, SECISBP2L, SGCE, TBC1D12, TMX4, TRIM33, UBE2R2, ULK2, VASH1, ZC3H6, ZEB1, ACVR1C, ARL5A, ATAD2B, ATP11C, ATP6V0A2, BAP1, BCL11B, BNC2, C1orf72, C1orf72, CCNYL1, CHSY1, CKAP4, CLASP2, COPS8, CORO1C, CPED1, DNAJB14, DTNA, EFN2, EIF2B5, ELAVL2, EVI5, FAT3, FBXO33, FBXW7, FERMT2, FEZ2, FNDCC3B, FSCN1, GIT2, GNAQ, HIPK1, HIPK3, HMOX1, HOOK1, JAZF1, KDELC1, KHDRBS1, KLF6, KRT80, LOX, MAP3K1, MAP4K4, MAPRE1, MBOAT2, MED13, MEX3D, NOTCH1, NOVA2, OCLN, OSBPL11, OTUD4, OXR1, PAG1, PDIK1L, PHACTR3, PI4K2B, PLXNC1, PPIA1, PRDM1, PRKACB, PTHLH, PTPN14, PUM2, QKI, RBFOX2, RDH10, RND3, RNF2, RPS6KB1, SCAMP1, SCN5A, SGIP1, SLC39A14, SMARCD1, SPAG9, SUZ12, SYVN1, TBL1XR1, TMOD3, TRAPPC8, TSC22D2, UBE2W, USP25, USP6NL, WASF3, WWC3, XKR4, ZC3H4, ZEB2, ZMAT3, ZSWIM4, A1CF, ADAMTS3, ADIPOR2, AFF3, AMFR, AP1S2, APOO, ARHGAP20, ARHGAP6, ARIH1, ARL2BP, ASAP1, B3GNT2, BDP1, BICC1, CASR, CASZ1, CBL, CBX4, CCDC177, CCDC82, CDH11, CDK17, CDYL, CDYL2, CECR2, CEP41, CEP85L, CFL2, CHMP5, CHRD1, CLIC4, CLIP1, CNEP1R1, CNKSR3, COL4A3BP, CRKL, CRTAP, CSMD3, CSNK1G3, DCBLD2, DENND5A, DENND5B, DES1, DGKA, DIXDC1, DLG1, DNAJB5, DNAJB9, DNAJC3, DPY19L1, DUSP1, DZIP1, ELK3, ELK4, ELMOD2, EPS8, ERG, ERFF1, FAM118B, FAM8A1, FARP1, FIGN, FLI1, FLII, FN1, FOXF1, FOXG1, FRMD6, GABBR2, GATA4, GLCC1, GOLGA1, GPATCH8, HDHD2, HMGB3, HNRNP, HS2ST1, HS3ST1, HS3ST3A1, HSPA13, IER5, IGF2R, INTS8, JAKMIP2, JKAMP, JUN, KANK2, KCND2, KDR, KIAA0355, LBR, LCA5, LRP1, LRRC8A, MAP2, MARCH6, MARCKS, MATR3, MCFD2, MFAP5, MGAT2, MIEF1, MPRIP, MSL2, MSN, MTF2, MTSSL1, MYB, MYZAP, NAB1, NANOS1, NBR1, NCOA2, NCS1, NEDD1, NOG, NPC1, NR3C1, NR5A2, NRBP1, NRG1, NTF3, NUDT4, NYAP1, OSTM1, PCDH19, PCMTD1, PHF21B, PI4KB, PIKFYVE, PITPNM3, PKD1, PKIA, PLCL1, PMAIP1, POLK, PPM1F, PPP1R10, PPP1R18, PPP1R9B, PPP4R2, PRDM16, PSAT1, PSIP1, PTPN12, PTPN21, RAB11FIP2, RAB21, RANBP10, RANBP9, RAP1B, RASA2, RASSF8, RBFOX3, RECK, RGL1, RIMS2, RIPK2, ROCK2, RSPRY1, RTF1, RUSC2, S100BP, SBSPO, SCD, SCN8A, SCRT2, SEC23A, SEMA3F, SEMA6D, SERINC1, SERPINI1, SESN1, SFXN1, SIX1, SLC14A1, SLC1A2, SLC24A4, SLC35E2B, SLC6A1, SLC6A11, SLIT2, SLITRK1, SLK, SOX2, SRGAP1, SULF1, SYDE1, SYNJ1, TAF12, TBK1, TCAIM, TFAP2A, THAP1, TIMP2, TLN1, TLN2, TMEM136, TMEM164, TMEM17, TOB1, TRHDE, TSC22D1, TUBB, UHRF1BP1, USP27X, VASH2, VAT1L, VLDLR, WASF1, WDR82, XKR8, YPEL2, YWHAB, YWHAG, ZBTB38, ZCCHC24, ZFAND6, ZFPM2, ZNF131, ZNF217, ZNF532, ZNF711, ZYG11B, LARP1B, NDN, PPP1CB</p> |
| hsa-mir-7-1    | <p>NUFIP2, PRKG1, ZBTB20, BRWD3, DDX3X, FSTL1, MBNL3, MIER3, PTAR1, SESN3, AHR, ANTXR2, ATL2, CAB39, CAMSAP2, CASK, CNOT6, CTDSP2, EGLN1, ELL2, FOXN2, FRMD4B, GPM6A, INO80D, MAP3K2, PPP1R9A, RFX7, SATB1, SLC4A7, TMEFF2, VEGFA, WIPF1, ZFX, AGFG1, ANK3, ATXN7, BNIP2, C5orf24, CACNB4, CADM2, CBFB, CCNT2, CDH20, CEP350, CHN2, CLASP1, COL19A1, CREB1, CYTH1, DICER1, DPYSL2, EIF5A2, FBXO28, FBXO30, GAB1, GLCE, GMFB, GOLGA7, GPR158, GUCY1A2, HOOK3, IMMP2L, KLF12, LARP4, LRP1B, MBNL2, MIB1, MYEF2, NOVA1, NRXN1, OSBPL8, PDE4D, PDS5B, PEAK1, PGAP1, PPP2R5E, PTP4A1, PTPN4, RBMS3, RC3H1, REEP1, RNF138, ROBO2, RPS6KA3, SDC2, SEL1L, SGCE, SLC12A2, SMNDC1, STX16, TAF9B, TAOK1, TBC1D12, THSD7A, TMEM65, TMX4, TNPO1, USP37, YTHDF3, ZEB1, ZFH3, ZMYM2, ABCB1, ABHD13, AEBP2, AFF4, ALCAM, ALDH1L2, AMMECR1, ANKRD13C, ARHGAP12, ARHGAP42, ASF1A, ATAD1, BAZ1A, CBX5, CCDC50, CCDC88A, CCSER1, CCSER2, CDC42SE2, CDC73, CDH10, CDK14, CMPK1, CNR1, CNTLN, COL4A1, COPS7B, CPEB2, CTBP2, DCAF7, DDX6, DIP2C, EEA1, EID1, EIF4E, EML5, EPHA5, ESM1, ETKN1, EXD1, FAM126A, FAM19A2, FAT4, FBXO9, FGF14, FGFR1OP2, FGL2, FXR1, GN84, GPATCH2, GPC4, GPR137B, GPR180, HAPLN1, HCFC2, HCN1, HDAC9, HMGCLL1, HTR2C, IL1RAP, IPMK, IREB2, ITGB1, KCNK2, KDM4A, KDM4C, KIAA1841, KLF8, KLHL15, KLHL24, LCLAT1, LRP12, LRRC58, MAGT1, MAPK1IP1L, MAPK9, MGAT4A, MYCN, MYNN, N4BP2L1, NEK7, NELL2, NETO2, NFATC1, NFE2L2, NPAS3, NUCKS1, ONECUT2, PAIP2, PARP8, PDLIM5, PEX3, PFDN4, PHC3, PIWIL1, POU3F1, PPIA2, PPP3CA, PRICKLE2, PSD3, PTGFRN, RAB10, RALGPS2, RAPGEF6, RBM7, REEP3, RNF19A, RSR1, SCEL, SEC24A, SETD2, SKIL, SLAIN1, SLC17A6, SLC19A2, SLC25A16, SLC35A3, SLC7A14, SMIM14, SNCA, SRSF11, SSBP3, STAM2, STXB5, SYT14, TAL1, TM9SF2, TM9SF3, TMEM181, TMEM64, TMX3, TOPORS, TP53INP1, TRAF6, TRPV3, TTC30B, UNC5C, USP14, USP34, VGLL3, VPS26A, YOD1, ZBTB10, ZFH4, ZNF626, ZNF780B, ACTA1, ACTR10, ACTR2, ACTR8, ACYP2, ADNP2, AGMO, AKAP6, AMER2, ANGPTL3, ANKRD46, APC, AQP4, AQR, ARHGAP44, ARHGAP5, ARHGEF12, ARMCMX1, ART3, ASB5, ASB7, ASB9, ASTN1,</p>                                                                                                                                                                                                                                                                                                                                                                                                                                                                                                                                                                                                                                                                                                                                                                                                                                                                                                           |

|             |                                                                                                                                                                                                                                                                                                                                                                                                                                                                                                                                                                                                                                                                                                                                                                                                                                                                                                                                                                                                                                                                                                                                                                                                                                                                                                                                                                                                                                                                                                                                                                                                                                                                                                                                                                                                                                                                                                                                                                                                                                                                                                                                                                                                                                                                                                                                                                                                                                                                                                                                                                                                                                                                                                                                                                                                                                                                                                                                                                                                                                                                                          |
|-------------|------------------------------------------------------------------------------------------------------------------------------------------------------------------------------------------------------------------------------------------------------------------------------------------------------------------------------------------------------------------------------------------------------------------------------------------------------------------------------------------------------------------------------------------------------------------------------------------------------------------------------------------------------------------------------------------------------------------------------------------------------------------------------------------------------------------------------------------------------------------------------------------------------------------------------------------------------------------------------------------------------------------------------------------------------------------------------------------------------------------------------------------------------------------------------------------------------------------------------------------------------------------------------------------------------------------------------------------------------------------------------------------------------------------------------------------------------------------------------------------------------------------------------------------------------------------------------------------------------------------------------------------------------------------------------------------------------------------------------------------------------------------------------------------------------------------------------------------------------------------------------------------------------------------------------------------------------------------------------------------------------------------------------------------------------------------------------------------------------------------------------------------------------------------------------------------------------------------------------------------------------------------------------------------------------------------------------------------------------------------------------------------------------------------------------------------------------------------------------------------------------------------------------------------------------------------------------------------------------------------------------------------------------------------------------------------------------------------------------------------------------------------------------------------------------------------------------------------------------------------------------------------------------------------------------------------------------------------------------------------------------------------------------------------------------------------------------------------|
|             | <p>ATP1A2, ATP8A1, ATRX, AZIN1, BCAP29, BCCIP, BCL2L1, BCLAF1, BDNF, BEND4, BHLHE22, BMPR1B, BTBD10, BTF3L4, BTN3A1, BTN3A2, BZW1, C10orf88, C12orf29, C12orf56, C18orf63, C2orf69, C5orf47, CACNA1C, CALCR, CAMTA2, CAPRIN1, CBLL1, CBLN4, CCDC126, CCNG2, CCNY, CD2AP, CDC23, CDC27, CDH19, CDH8, CDK1, CDKN2B, CEP170, CFHR2, CHM, CHRNA6, CLCA4, CLDN11, CNOT7, COPB1, CPE, CPEB4, CRABP2, CREBBP, CSRN1P, CTLA4, CTNND2, CXADR, CXCL2, CXorf56, CYP26B1, DACT1, DBI, DCAF12L1, DCAF13, DCUN1D3, DCUN1D5, DEK, DLG2, DLX2, DMRT1, DMXL2, DNAH14, DOK5, DPY19L3, EBF2, EDEM3, EDIL3, EEF1E1, EIF3A, ELF1, ENO2, EPB41L3, EPS15, ERI1, EXOC5, EXOC6, FAM13C, FAM169A, FAM184A, FAM19A4, FAM91A1, FAN1, FAXC, FBXL17, FBXL3, FBXO45, FER, FGF2, FGF7, FMN1, FNIP1, FPR3, FRMD3, FSD1L, FZD8, G3BP1, GABPB1, GABRA4, GDF6, GGPS1, GJA1, GMEB1, GOLGA6L9, GOPC, GPR17, GPR19, GPR22, GRIA1, GTF2A1, GTF2H3, GULP1, GZF1, HDAC2, HERC2, HINT3, HIVEP2, HNRNPA3, HNRNPR, HOXA5, HP1BP3, HSD11B1, HSP90AA1, HSPA5, HTATSF1, IDH1, IFT57, IL13RA1, IMPACT, ITGA4, ITGB6, ITIH6, ITPR2, KAT6B, KCNC2, KCNH5, KCTD9, KHDRBS2, KHDRBS3, KIAA0232, KIF5C, KLF3, KLHL2, KSR2, LMAN1, LRBA, LRRC1, LRRTM2, MACROD2, MANEA, MAP3K5, MAP7, MAT1A, MB21D2, MBLAC2, MCC, MCEE, MCOLN2, MCU, MECOM, MED12, MED6, MEF2D, MFAP4, MIPOL1, MLF1, MORF4L2, MPC1, MPL, MSL3, MSX1, MTDH, MTSS1, MUC13, MVB12B, MYSM1, NAA15, NANP, NAP1L1, NAP1L2, NCAPG2, NETO1, NEUROD6, NHSL1, NIPBL, NKAIN2, NMT2, NOD1, NRXN3, NTN4, NUDT5, NXPH2, OLA1, OPCML, OR2L13, OTUD6B, OXNAD1, PABPC5, PANK3, PAX3, PBRM1, PCDH11X, PCDH18, PCDH9, PDCD1LG2, PDE3B, PDE5A, PDGFA, PELI1, PER3, PHF1, PHF19, PHF20L1, PHLPP1, PIAS2, PICALM, PIGM, PIK3CB, PJA2, PLD5, PLEKHG4, PLXNA4, PNLI1P3, PNRC1, POLDIP3, POLR3A, POLR3G, PPARGC1A, PPP3R1, PRICKLE1, PRKAR1A, PRR23B, PSMA5, PTC2, PTGS2, PTPDC1, PTPRA, PTPRF, RAB18, RAB2A, RAB3C, RAB3IP, RASSF6, RBM12, RBM46, RCS1, RIF1, RIMBP2, RIMKLB, RMI1, RNF111, RNF139, RORB, RPE, RPRIP1, RRM2, RSP03, RWDD3, SATB2, SCAF8, SCG2, SCYL3, SEC14L1, SEC23IP, SENP6, SENP7, SF3B1, SH3BGR1, SIAH1, SKAP2, SLC10A7, SLC12A5, SLC13A1, SLC25A24, SLC30A5, SLC39A8, SLC5A7, SLC6A2, SLC7A7, SLC9C1, SLITRK4, SMARCA2, SNTG1, SOS1, SPCS2, SPIN1, SPIN4, SPP1, SPTSSA, SREK1IP1, SYNPO2, TASP1, TBC1D32, TEAD3, TFAP4, TGFBR3, THAP2, THBS2, THEMIS, THRAP3, TIMM21, TMED2, TMEM132C, TMEM170B, TMEM220, TMEM245, TMEM30B, TMEM33, TMEM41B, TMEM47, TMOD2, TMPSR51A, TNKS, TOR1A, TOR1AIP1, TOR1AIP2, TPDS2L1, TRAF7, TRIM2, TRIM32, TRPA1, TRPC1, TRPM6, TTC27, TTYH3, TXLNB, TXNRD1, U2SURP, UBE2E1, UBE2V2, UFM1, UHMK1, UHRF1BP1L, UPRT, USP51, VGLL4, VPS41, WDFY3, WDR48, WDR76, WFS1, ZC3HAV1L, ZCRB1, ZFP42, ZFR, ZFYVE16, ZIC4, ZMYM5, ZMYND11, ZNF23, ZNF264, ZNF273, ZNF280B, ZNF519, ZNF638, ZNHIT6, <b>NUTF2</b></p>                                                                                                                                                                                                                                                  |
| hsa-mir-7-2 | <p><b>NUFIP2, PRKG1, ZBTB20, BRWD3, DDX3X, FSTL1, MBNL3, MIER3, PTAR1, SESN3, AHR, ANTXR2, ATL2, CAB39, CAMSAP2, CASK, CNOT6, CTDSP2, EGLN1, ELL2, FOXN2, FRMD4B, GPM6A, INO80D, MAP3K2, PPP1R9A, RFX7, SATB1, SLC4A7, TMEFF2, VEGFA, WIPF1, ZFX, AGFG1, ANK3, ATXN7, BNIP2, C5orf24, CACNB4, CADM2, CBF8, CCNT2, CDH20, CEP350, CHN2, CLASP1, COL19A1, CREB1, CYTH1, DICER1, DPYSL2, EIF5A2, FBXO28, FBXO30, GAB1, GLCE, GMFB, GOLGA7, GPR158, GUCY1A2, HOOK3, IMM2P, KLF12, LARP4, LRP1B, MBNL2, MIB1, MYEF2, NOVA1, NRXN1, OSBP1, PDE4D, PDS5B, PEAK1, PGAP1, PPP2R5E, PTP4A1, PTPN4, RBMS3, RC3H1, REEP1, RNF138, ROBO2, RPS6KA3, SDC2, SEL1L, SGCE, SLC12A2, SMNDC1, STX16, TAF9B, TAOK1, TBC1D12, THSD7A, TMEM65, TMX4, TNPO1, USP37, YTHDF3, ZEB1, ZFXH3, ZMYM2, ABCB1, ABHD13, AEBP2, AFF4, ALCAM, ALDH1L2, AMMECR1, ANKRD13C, ARHGAP12, ARHGAP42, ASF1A, ATAD1, BAZ1A, CBX5, CCDC50, CCDC88A, CCSER1, CCSER2, CDC42SE2, CDC73, CDH10, CDK14, CMPK1, CNR1, CNTLN, COL4A1, COPS7B, CPEB2, CTBP2, DCAF7, DDX6, DIP2C, EEA1, EID1, EIF4E, EML5, EPHA5, ESM1, ETKN1, EXD1, FAM126A, FAM19A2, FAT4, FBXO9, FGF14, FGFR10P2, FGL2, FXR1, GNB4, GPATCH2, GPC4, GPR137B, GPR180, HAPLN1, HCFC2, HCN1, HDAC9, HMGCLL1, HTR2C, IL1RAP, IPMK, IREB2, ITGB1, KCNK2, KDM4A, KDM4C, KIAA1841, KLF8, KLHL15, KLHL24, LCLAT1, LRP12, LRRC58, MAGT1, MAPK1IP1L, MAPK9, MGAT4A, MYCN, MYNN, N4BP2L1, NEK7, NELL2, NETO2, NFATC1, NFE2L2, NPAS3, NUCKS1, ONCUT2, PAIP2, PARP8, PDLIM5, PEX3, PFDN4, PHC3, PIWIL1, POU3F1, PPIA2, PPP3CA, PRICKLE2, PSD3, PTGFRN, RAB10, RALGPS2, RAPGEF6, RBM7, REEP3, RNF19A, RSR1, SCEL, SEC24A, SETD2, SKIL, SLAIN1, SLC17A6, SLC19A2, SLC25A16, SLC35A3, SLC7A14, SMIM14, SNCA, SRSF11, SSBP3, STAM2, STXB5, SYT14, TAL1, TM9SF2, TM9SF3, TMEM181, TMEM64, TMX3, TOPORS, TP53INP1, TRAF6, TRPV3, TTC30B, UNC5C, USP14, USP34, VGLL3, VPS26A, YOD1, ZBTB10, ZFXH4, ZNF626, ZNF780B, ACTA1, ACTR10, ACTR2, ACTR8, ACYP2, ADNP2, AGMO, AKAP6, AMER2, ANGPTL3, ANKRD46, APC, AQP4, AQR, ARHGAP44, ARHGAP5, ARHGEF12, ARMCMX1, ART3, ASB5, ASB7, ASB9, ASTN1, ATP1A2, ATP8A1, ATRX, AZIN1, BCAP29, BCCIP, BCL2L1, BCLAF1, BDNF, BEND4, BHLHE22, BMPR1B, BTBD10, BTF3L4, BTN3A1, BTN3A2, BZW1, C10orf88, C12orf29, C12orf56, C18orf63, C2orf69, C5orf47, CACNA1C, CALCR, CAMTA2, CAPRIN1, CBLL1, CBLN4, CCDC126, CCNG2, CCNY, CD2AP, CDC23, CDC27, CDH19, CDH8, CDK1, CDKN2B, CEP170, CFHR2, CHM, CHRNA6, CLCA4, CLDN11, CNOT7, COPB1, CPE, CPEB4, CRABP2, CREBBP, CSRN1P, CTLA4, CTNND2, CXADR, CXCL2, CXorf56, CYP26B1, DACT1, DBI, DCAF12L1, DCAF13, DCUN1D3, DCUN1D5, DEK, DLX2, DMRT1, DMXL2, DNAH14, DOK5, DPY19L3, EBF2, EDEM3, EDIL3, EEF1E1, EIF3A, ELF1, ENO2, EPB41L3, EPS15, ERI1, EXOC5, EXOC6, FAM13C, FAM169A, FAM184A, FAM19A4, FAM91A1, FAN1, FAXC, FBXL17, FBXL3, FBXO45, FER, FGF2, FGF7, FMN1, FNIP1, FPR3, FRMD3, FSD1L, FZD8, G3BP1, GABPB1, GABRA4, GDF6, GGPS1, GJA1, GMEB1, GOLGA6L9, GOPC, GPR17, GPR19, GPR22, GRIA1, GTF2A1, GTF2H3, GULP1, GZF1, HDAC2, HERC2, HINT3, HIVEP2, HNRNPA3, HNRNPR, HOXA5, HP1BP3, HSD11B1, HSP90AA1,</b></p> |

|                                                                          |                                                                                                                                                                                                                                                                                                                                                                                                                                                                                                                                                                                                                                                                                                                                                                                                                                                                                                                                                                                                                                                                                                                                                                                                                                                                                                                                                                                                                                                                                                                                                                                                                                                                                                                                                                                                                                                                                                                                                                                                                                                                                                                                                                                                                                                                                                                                                                                                                                                                                                    |
|--------------------------------------------------------------------------|----------------------------------------------------------------------------------------------------------------------------------------------------------------------------------------------------------------------------------------------------------------------------------------------------------------------------------------------------------------------------------------------------------------------------------------------------------------------------------------------------------------------------------------------------------------------------------------------------------------------------------------------------------------------------------------------------------------------------------------------------------------------------------------------------------------------------------------------------------------------------------------------------------------------------------------------------------------------------------------------------------------------------------------------------------------------------------------------------------------------------------------------------------------------------------------------------------------------------------------------------------------------------------------------------------------------------------------------------------------------------------------------------------------------------------------------------------------------------------------------------------------------------------------------------------------------------------------------------------------------------------------------------------------------------------------------------------------------------------------------------------------------------------------------------------------------------------------------------------------------------------------------------------------------------------------------------------------------------------------------------------------------------------------------------------------------------------------------------------------------------------------------------------------------------------------------------------------------------------------------------------------------------------------------------------------------------------------------------------------------------------------------------------------------------------------------------------------------------------------------------|
|                                                                          | <p>HSPA5, HTATSF1, IDH1, IFT57, IL13RA1, IMPACT, ITGA4, ITGB6, ITIH6, ITPR2, KAT6B, KCNC2, KCNH5, KCTD9, KHDRBS3, KHDRBS3, KIAA0232, KIF5C, KLF3, KLHL2, KSR2, LMAN1, LRBA, LRRCC1, LRRTM2, MACROD2, MANEA, MAP3K5, MAP7, MAT1A, MB21D2, MBLAC2, MCC, MCEE, MCOLN2, MCU, MECOM, MED12, MED6, MEF2D, MFAP4, MIPOL1, MLF1, MORF4L2, MPC1, MPL, MSL3, MSX1, MTDH, MTSS1, MUC13, MVB12B, MYSM1, NAA15, NANP, NAP1L1, NAP1L2, NCAPG2, NETO1, NEUROD6, NHSL1, NIPBL, NKAIN2, NMT2, NOD1, NRXN3, NTN4, NUDT5, NXPH2, OLA1, OPCML, OR2L13, OTUD6B, OXNAD1, PABPC5, PANK3, PAX3, PBRM1, PCDH11X, PCDH18, PCDH9, PDCD1LG2, PDE3B, PDE5A, PDGFA, PELI1, PER3, PHF1, PHF19, PHF20L1, PHLPP1, PIAS2, PICALM, PIGM, PIK3CB, PJA2, PLD5, PLEKHG4, PLXNA4, PNLIIPR3, PNRC1, POLDIP3, POLR3A, POLR3G, PPARGC1A, PPP3R1, PRICKLE1, PRKAR1A, PRR23B, PSMA5, PTC2, PTGS2, PTPDC1, PTPRA, PTPRF, RAB18, RAB2A, RAB3C, RAB3IP, RASSF6, RBM12, RBM46, RCSD1, RIF1, RIMBP2, RIMKLB, RMI1, RNF111, RNF139, RORB, RPE, RPGRIP1L, RRM2, RSP03, RWDD3, SATB2, SCAF8, SCG2, SCYL3, SEC14L1, SEC23IP, SENP6, SENP7, SF3B1, SH3BGR12, SIAH1, SKAP2, SLC10A7, SLC12A5, SLC13A1, SLC25A24, SLC30A5, SLC39A8, SLC5A7, SLC6A2, SLC7A7, SLC9C1, SLITRK4, SMARCA2, SNTG1, SOS1, SPCS2, SPIN1, SPIN4, SPP1, SPTSSA, SREK1IP1, SYNPO2, TASP1, TBC1D32, TEAD3, TFAP4, TGFB3, THAP2, THBS2, THEMIS, THRAP3, TIMM21, TMED2, TMEM132C, TMEM170B, TMEM220, TMEM245, TMEM30B, TMEM33, TMEM41B, TMEM47, TMOD2, TMPRSS11A, TNKS, TOR1A, TOR1AIP1, TOR1AIP2, TPD52L1, TRAF7, TRIM2, TRIM32, TRPA1, TRPC1, TRPM6, TTC27, TTYH3, TXLNB, TXNRD1, U2SURP, UBE2E1, UBE2V2, UFM1, UHMK1, UHRF1BP1L, UPRT, USP51, VGLL4, VPS41, WDFY3, WDR48, WDR76, WFS1, ZC3HAV1L, ZCRB1, ZFP42, ZFR, ZFYVE16, ZIC4, ZMYM5, ZMYND11, ZNF23, ZNF264, ZNF273, ZNF280B, ZNF519, ZNF638, ZNHIT6</p>                                                                                                                                                                                                                                                                                                                                                                                                                                                                                                                                                                                                                                                                         |
| hsa-miR-7-5p                                                             | <p>PTAR1, ATXN1, SATB1, STRN, ZNF704, CACNB4, CYTH3, DACH1, DPYSL2, FBXO28, GJC1, GLI3, KLF12, KLF4, PDE4D, RBMS3, TRIM33, ULK2, CKAP4, CLASP2, FAM168B, HCN1, KBTBD2, NFAT5, NOVA2, OSBPL11, OXR1, RPS6KB1, SH3GLB1, SLC25A16, SNARCD1, SNCA, SP1, VPS26A, WASF3, ZC3H4, ANKRD12, DIRAS1, GGA2, IDE, KLHL14, NDFIP2, NR4A3, NREP, NXT2, PAK2, PAN2, PLEC, PRKCB, RGS7BP, RSNB1, RSPRY1, SEMA4C, SLC5A3, SOX6, SPTY2D1, STRN3, UBXLN2B, 39692, ADAM11, ADCY9, ANKFY1, ARF4, ARID2, ARID4A, ASXL1, ATP2B2, BLOC1S4, C1orf21, C1orf226, C5orf22, CACNG7, CADM3, CCDC43, CCL16, CGGBP1, CHAMP1, CHD3, CHSY3, CNN3, CNPPD1, CTSB, DDIT4, EGFR, EIF4EBP2, EPHA3, EXOSC2, FAM131B, FAM168A, FBXL7, FNDC4, FOXN3, GAL3ST3, GALNT3, GATA6, GRIN2A, GRP, HDLBP, HERPUD2, HMG20A, HPCAL4, HS3ST5, IDS, IGLON5, IPO11, IRS1, IRS2, KDM3B, KIF13A, KIF16B, LEMD3, LRRCC1, LRRCS9, MAFG, MAPKAP1, MEGF9, MIS12, NR2C1, OGT, PARP1, PDE4A, PFN2, PIGH, PIK3CD, PIK3R3, PLCB1, PLP2, PLXNA1, POLE4, PPP4R1, PSME3, RAB11FIP5, RAF1, RB1, RBFOX1, RNF141, RNF144A, RRAS2, RYK, SHANK2, SLC6A9, SOCS2, SPATA2, SQSTM1, SRRM3, TAB2, TCF12, TFRC, TMED9, TNK2, TRMT13, UBLCP1, UBQLN4, VDAC1, VDAC3, WDR47, XPO7, ZBTB22, ZNF395, ZNF609, ZNF805</p>                                                                                                                                                                                                                                                                                                                                                                                                                                                                                                                                                                                                                                                                                                                                                                                                                                                                                                                                                                                                                                                                                                                                                                                                                                                                 |
| Genes potentially regulated by miRNAs whose levels are increased in Nuli |                                                                                                                                                                                                                                                                                                                                                                                                                                                                                                                                                                                                                                                                                                                                                                                                                                                                                                                                                                                                                                                                                                                                                                                                                                                                                                                                                                                                                                                                                                                                                                                                                                                                                                                                                                                                                                                                                                                                                                                                                                                                                                                                                                                                                                                                                                                                                                                                                                                                                                    |
| hsa-let-7f-1                                                             | <p>AKAP6, COL4A3BP, CPEB2, EEA1, GTF2I, HECTD2, IKZF2, RICTOR, TGFB3, 40057, AAK1, ADRB2, AKAP10, AKAP13, AKAP9, AP1S3, APOOL, ARAP2, ARHGEF2, ARHGAP20, ARID1B, ARID4B, ASAH1, ASAP2, ATRX, BAG2, BCL6, BHLHE40, BMPER, BMPR2, BTBD3, CALN1, CCL7, CEP41, CHD1, CLDN12, CNOT6, CNOT6L, COL19A1, COL1A2, COL4A1, CPEB3, CRISPLD1, CTTNBP2NL, DCUN1D4, DDX21, DKK3, DOCK11, DUSP6, DYNC2LI1, E2F5, EBF3, ELK4, EPHB4, ERF, FAM126B, FBXO34, FGD6, FLI1, FNDC3A, FNDC3B, FOXN2, FRMD4B, FSTL5, FUT9, GATA3, GNAQ, GOLIM4, GP1BA, GRHL3, HIP1, HIPK3, HMGXB4, HOOK3, HOXA9, HSPA14, IGF1R, INO80D, IPMK, IRX3, ITM2B, JAG2, KIAA1217, KIF3A, KLF3, KLHL2, KMT2C, LCOR, LEMD3, LIX1L, LRCH4, LRP1B, LRP6, LSM14A, LYSMD3, MAP2, MAPKAPK5, MBNL1, MBNL2, MEF2C, MEF2D, MMS22L, MON2, MYCBP2, MYCN, MYT1L, N4BP2, NAA20, NADK2, NASP, NCKAP1, NKTR, NRP1, NUP98, OLFML2B, OTX2, PAK2, PCSK2, PDE10A, PIK3C2A, PNISR, PPFA2, PPP1R15B, PPP4R2, PRDM16, PRPF38B, PRR12, PUM2, QKI, RAB11FIP3, RAB14, RAB2A, RAB3GAP2, RAD21, RALGDS, RBM12B, RC3H1, RDX, SALL3, SATB1, SECISBP2L, SEMA3C, SEPHS1, SET, SFPQ, SH3GL3, SLAIN2, SLC2A13, SLC6A14, SLC8A1, SMARCA5, SOX9, SPOCK3, STK40, TASP1, TCF3, TET3, TFRC, TLE1, TLE4, TMEM132B, TMTC2, TOB1, TVP23B, U2SURP, UBE2B, UBE2H, UBE3C, UBR1, ULBP1, USP24, USP25, USP32, UTRN, VAV3, VCL, WAC, ZBTB39, ZMYM6, ZNF292, ZNF326, AASDH, ABI1, ACBD3, ACTL6A, ACTR3, ACTR3C, ACVR1, ACVR2B, ADAM28, AFF3, AGTR1, AHR, AKAP12, AKTIP, ALDH1L2, ALKBH8, AMMECR1, ANAPC13, ANK3, ANKRD44, ANO4, ANO5, APLF, APP, APPL1, ARHGAP12, ARHGAP44, ARHGEF28, ARHGEF33, ARID4A, ARIH1, ARNTL, ASB11, ATAD5, ATF2, ATG2B, ATL1, ATP6V1H, AUTS2, B3GNT2, BASP1, BAZ1B, BCAP29, BDNF, BLOC1S4, BMP3, BRD1, BRF2, BRIP1, BRWD3, BST1, BTA1F1, BTF3L4, BTNL9, C11orf54, C11orf58, C18orf63, C1QBP, C1QTNF7, C5orf58, C6orf106, C7orf57, CAB39, CACNA1C, CACNA2D1, CADM1, CARF, CCDC102B, CCDC126, CCNA2, CCNE2, CCNY, CD38, CDC7, CDH20, CDK19, CECR2, CENPE, CEP192, CEP57, CEP76, CEPT1, CFTR, CHD3, CLASP2, CLDN1, CLDN16, CLIP1, CLOCK, CMPK1, CNNM4, CNTN1, COG7, COL11A1, COLCA2, CORO1C, CPNE2, CREBRF, CREBZF, CRY1, CTNNB1, CTR9, CTU2, CUL1, CWC22, CYP7B1, DAAM1, DACH1, DACT1, DCAF6, DCAF7, DCBLD2, DCC, DCLK3, DCLRE1B, DENND4A, DERL1, DGKH, DLL1, DLL4, DLX2, DMTF1, DNAJB5, DNAJC6, DNALI1, DNPEP, DOCK1, DOCK10, DPM1, DR1, DSG2, DVL2, E2F8, EDIL3, EFNB1, EFR3A, EGFL6, EIF1AD, EIF4A2, EIF4ENIF1, EIF4G3, ELAVL2, ELOVL2, ELOVL7, EMP2, EPS15L1, ERI1,</p> |



|              |                                                                                                                                                                                                                                                                                                                                                                                                                                                                                                                                                                                                                                                                                                                                                                                                                                                                                                                                                                                                                                                                                                                                                                                                                                                                                                                                                                                                                                                                                                                                                                                                                                                                                                                                                                                                                                                                                                                                                                                                                                                                                                                                                                                                                                                                                                                                                                                                                                                                                                                                                                                                                                                                                                                                                                                                                                                                                                                                                                  |
|--------------|------------------------------------------------------------------------------------------------------------------------------------------------------------------------------------------------------------------------------------------------------------------------------------------------------------------------------------------------------------------------------------------------------------------------------------------------------------------------------------------------------------------------------------------------------------------------------------------------------------------------------------------------------------------------------------------------------------------------------------------------------------------------------------------------------------------------------------------------------------------------------------------------------------------------------------------------------------------------------------------------------------------------------------------------------------------------------------------------------------------------------------------------------------------------------------------------------------------------------------------------------------------------------------------------------------------------------------------------------------------------------------------------------------------------------------------------------------------------------------------------------------------------------------------------------------------------------------------------------------------------------------------------------------------------------------------------------------------------------------------------------------------------------------------------------------------------------------------------------------------------------------------------------------------------------------------------------------------------------------------------------------------------------------------------------------------------------------------------------------------------------------------------------------------------------------------------------------------------------------------------------------------------------------------------------------------------------------------------------------------------------------------------------------------------------------------------------------------------------------------------------------------------------------------------------------------------------------------------------------------------------------------------------------------------------------------------------------------------------------------------------------------------------------------------------------------------------------------------------------------------------------------------------------------------------------------------------------------|
|              | <p>ETS2, F2RL1, F3, FA2H, FAM117B, FAM126A, FAM19A4, FAM204A, FAM3C, FAM76B, FAT3, FBLN5, FBN1, FBXL3, FBXO33, FBXO43, FBXO45, FGF7, FGFR2, FLT3LG, FNBP4, FOXO1, FOXP1, FREM2, FRMD6, FRS2, FSCN1, FSHB, FYTDD1, FZD6, GABRG1, GDAP1, GDAP2, GIGYF2, GLCC1, GLS, GNA13, GNAI3, GNAL, GNB4, GOLGA2, GPR158, GPR37, GPRIN3, GRKS, GRM3, GRM5, GSK3B, GTF2A1, GTF3C3, GULP1, HEATR5B, HECTD1, HERC2, HES1, HIC1, HIVEP2, HMGCR, HNRNPA1, HNRNPA1L2, HNRNPA2B1, HNRNPD, HS6ST2, HTR2A, ICK, ID1, ID4, IER5, IGFBP1, IMPACT, IREB2, ISM1, ITCH, ITGA6, ITGAV, ITM2C, JAG1, JAK2, JPH1, KBTBD7, KCNJ15, KDM2B, KDM6A, KIAA0408, KIAA1109, KIAA1211, KIF11, KIF21A, KIF2A, KIN, KLF12, KLF2, KLF4, KLHDC2, KPNA3, KRAS, KRBOX4, L3HYPDH, LAMP2, LGALS1, LGR4, LHFPL3, LILRA1, LIN54, LIN9, LIPG, LRRC1, LRRC32, LRRC4, LRRTM4, LTN1, LY75, LYPLAL1, MAGI1, MALT1, MAN1A1, MAP2K3, MARC1, MARCH6, MARK1, MAST4, MATN2, MBLAC2, MECOM, MED14, MED6, MEX3B, MIF4GD, MLLT10, MLLT6, MMAB, MMP20, MNX1, MPC2, MPP6, MRPL44, MSANTD2, MTF1, NAA16, NAA25, NBEA, NCOA2, NDC1, NEUROG2, NF1, NFAT5, NFYB, NGDN, NIN, NLGN1, NOL4, NPY, NPY1R, NR2F2, NR3C1, NR4A3, NR5A2, NRBF2, NRP2, NTN4, NUDT11, NUDT12, NUDT4, NUFIP2, NUP35, OLIG3, OPA1, OTUD4, OTUD6B, OXR1, PAN3, PANK3, PARD6B, PARPBP, PAXBP1, PCDH8, PDAP1, PDLIM5, PDZRN3, PEAK1, PECR, PEX5L, PFKFB3, PHACTR2, PHC3, PHIP, PHYHIPL, PI15, PIAS1, PIK3R4, PIKFYVE, PLAG1, PLCB4, PLCL2, PLEKHA6, POLR2K, POU4F2, PPM1A, PPM1D, PPM1L, PPP1R2, PPP1R21, PPP1R3F, PPP3CA, PRKAA1, PRPF8, PRRC1, PSD2, PSD3, PSIP1, PTBP3, PTCH1, PTER, PTMS, PTPRE, PUM1, RAB10, RAB11B, RAB11FIP2, RAB6B, RABGGTB, RAPH1, RASEF, RBM22, RBPJ, REV3L, RFC3, RFX1, RHOA, RHOBTB3, RHOT1, RIF1, RIMKLB, RIPPLY2, RNF138, RNF149, RNF180, RNF216, RNF24, ROCK1, RPRD1A, RPRD1B, RPS16, RSF1, RTN1, SAMD12, SBF2, SCAI, SCAMP1, SCARF1, SCN2A, SCN7A, SDC2, SEC22C, SGTB, SHOC2, SLC18A2, SLC34A2, SLC35A3, SLC39A10, SLC39A6, SLC4A5, SLC6A11, SLC6A17, SLC6A4, SMARCA2, SNAPC1, SNCAIP, SOGA3, SORBS1, SOS2, SOWAHC, SP4, SP8, SPAST, SPEN, SPESP1, SPOPL, SPRED1, SPRY1, SPRY2, SPTB, SRBD1, SRSF1, SRSF11, SRSF2, ST5, STK24, STK38L, STON2, SUN1, SV2B, SYF2, SYNGR3, TAF2, TAF4B, TAOK1, TBC1D2B, TBR1, TCEG1L, TCF20, TEAD1, TET2, TGF83, THRB, TIGD7, TM4SF4, TMED7, TMTC4, TNS3, TRA2A, TRHDE, TRIM6, TRIM63, TRPM7, TSHZ3, TSLP, TTC30A, TTF2, TWISTNB, TXNRD3NB, UBE2Q2, UBE2W, UBFD1, UBL3, UBN1, UBN2, UBQLN1, UBTF, UBXN7, ULK1, UNC119B, USP12, USP34, VAPA, VEZF1, VMA21, WASF3, WBP2NL, WDR26, WIPI1, WNT5B, WWC1, WWC2, XPO1, YTHDC1, YTHDF3, YY1, ZBTB14, ZBTB18, ZC3H11A, ZDHHC20, ZFPM2, ZFY, ZFYVE16, ZFYVE21, ZIC1, ZMIZ1, ZMYM4, ZMYND8, ZNF236, ZNF302, ZNF367, ZNF430, ZNF501, ZNF518B, ZNF569, ZNF780A, ZNF800, ZNF827</p>                                                                                                                                                                                   |
| hsa-let-7f-2 | <p>AKAP6, COL4A3BP, CPEB2, EEA1, GTF2I, HECTD2, IKZF2, RICTOR, TGFBR3, 40057, AAK1, AKAP13, AKAP9, AP1S3, APOOL, ARAP2, ARFGEF2, ARHGAP20, ARID1B, ARID4B, ASAH1, ASAP2, ATRX, BAG2, BCL6, BHLHE40, BMPER, BMPR2, BTBD3, CALN1, CEP41, COL19A1, CRISPLD1, CTTNBP2NL, DCUN1D4, DDX21, DKK3, DOCK11, DUSP6, DYNC2LI1, E2F6, EBF3, ELK4, EPHB4, ERF, FAM126B, FBXO34, FLI1, FOXN2, FSTL5, FUT9, GATA3, GNAQ, GOLIM4, GP1BA, GRHL3, HAS2, HIPK3, HMGXB4, HOOK3, HOXA9, HSPA14, INO80D, IPMK, IRX3, ITM2B, JAG2, KIAA1217, KIF3A, KLF3, KLHL2, KMT2C, LCOR, LEMD3, LIX1, LRCH4, LRP1B, LRP6, LSM14A, LYSMD3, MAP2, MAPK8, MAPKAPK5, MBNL1, MBNL2, MEF2D, MMS22L, MON2, MYCBP2, MYT1L, N4BP2, NAA20, NADK2, NASP, NCKAP1, NKTR, NRP1, NUP98, OLFML2B, OTX2, PAK2, PCDH17, PCSK2, PDE10A, PIK3C2A, PLXNC1, PNISR, PPPIA2, PPP1R16B, PPP4R2, PRDM16, PRR12, PUM2, QKI, RAB11FIP3, RAB14, RAB2A, RAB3GAP2, RAD21, RALGDS, RANBP2, RBM12B, RBM27, RC3H1, RORA, SATB1, SECISBP2L, SEMA3C, SEPHS1, SET, SFPQ, SH3GL3, SLAIN2, SLC2A13, SLC6A14, SLC8A1, SMARCA5, SOX9, SPOCK3, STARD13, TASP1, TCF3, TFRC, TLE1, TLE4, TMEM132B, TMTC2, TOB1, TVP23B, U2SURP, UBE2B, UBE2H, UBE3C, UBR1, ULBP1, USP25, USP32, VCL, WAC, ZMYM6, ZNF292, ZNF326, ABL1, ACSL3, ADAMTS5, ADARB2, ANKS1A, ANP32A, ANXA1, ARAP1, AREG, ART3, ASXL1, ATP7A, ATXN3, AXIN2, BACH2, BAZ1A, BBX, BEND7, BEX4, BMP7, BRINP1, C18orf25, C1orf52, CAV2, CBFA2T2, CBX3, CCDC73, CCDC91, CDKL3, CEP70, CFL2, CNR1, CNTN3, CNTN6, CPD, CREB5, CREBBP, CSNK1G3, CSPP1, CXXC4, CYP26B1, DAGLA, DAZ1, DAZ2, DAZ3, DAZ4, DCP2, DEPCD7, DLX6, DNAJB4, DOCK3, DPP8, DST, EDN2, EFNA1, EGLN1, ENAM, ENC1, ENPP3, EPG5, EPN2, ERCC3, EYA1, EYA4, EYS, FAM221A, FERMT2, FGF13, FJX1, FOXE1, FOXF1, FOXO3, FRMPD4, GABRA1, GABRA4, GABRB2, GCC2, GOLPH3L, GPR18, GPR63, GRASP, GRIK4, GRIP1, GRM1, HMGB3, HNRNPDL, HOXA10, HOXC6, HSPE1-MOB4, HVCN1, IAPP, INPP5B, INSM1, IQGAP1, IQGAP2, IRF2BP2, IRF5, IRX1, IRX5, ITGA4, KCNG3, KHDRBS3, KIAA0319, KIAA1191, LANCL2, LGR5, LHX2, LMO3, MAGI3, MAP2K4, MAP3K5, MBNL3, MDM1, MED13L, MED23, MEOX2, MOB4, MPZ, MS4A13, MTFR1, MTMR12, MTOR, MYO1E, NAA15, NOTO, NRIP1, NUP133, NUP153, NUP160, NXT2, OTUD1, PAH, PCDH20, PCLO, PCM1, PDCD10, PDE11A, PDE7A, PHF12, PHF20L1, PHF3, PLEKHG1, PLSCR1, POLI, PPP2CB, PRR14L, PSME4, PTGER3, PTGFR, PTPN3, RAB18, RAP1B, RAPGEF5, RASA1, RBL2, RBPM5, RECK, RGS4, RNF182, RNF220, ROBO2, RRAS, SALL1, SAMD4A, SASH1, SEC11C, SERINC3, SETD9, SFMBT2, SFSWAP, SGCD, SGCG, SLC17A6, SLC1A2, SLC22A10, SLC30A5, SLC35E1, SLC7A11, SMARCA4, SMIM8, SMOC1, SNX3, SOCS7, SORT1, SPINK5, SSBP2, STRN4, STXBP1, STYX, TCF7L2, TEK, TENM1, TGDS, TIMP3, TM2D1, TMCC1, TMEM209, TMF1, TNFRSF11B, TOR1AIP2, TP53INP1, TRAM1, TRAPPC4, TRIM13, TRIM61, TRIO, TRMT1L, TSPAN12, TXLNG, UBE2O, USP7, VCAM1, VKORC1L1, VNN1, WDR72, WDR82, WT1, XIAP, ZC2HC1A, ZCCHC24, ZFX, ZIK1, ZNF441, ZNF570, ZNF619, ZNF649, ZNF830, ZNRF3, ZSWIM6</p> |

|                                                                          |                                                                                                                                                                                                                                                                                                                                                                                                                                                                                                                                                                                                                                                                                                                                                                                                                                                                                                                                                                                                                                                                                                                                                                                                                                                                                                                                                                                                                                                                                                                                                                                                                                                                                                                                                                                                                                                                                                                                                                                                                                                                                                                                                                                                                                                                                                                                                                                                                                                                                                                                                                                                                                                                                                                                                                                                     |
|--------------------------------------------------------------------------|-----------------------------------------------------------------------------------------------------------------------------------------------------------------------------------------------------------------------------------------------------------------------------------------------------------------------------------------------------------------------------------------------------------------------------------------------------------------------------------------------------------------------------------------------------------------------------------------------------------------------------------------------------------------------------------------------------------------------------------------------------------------------------------------------------------------------------------------------------------------------------------------------------------------------------------------------------------------------------------------------------------------------------------------------------------------------------------------------------------------------------------------------------------------------------------------------------------------------------------------------------------------------------------------------------------------------------------------------------------------------------------------------------------------------------------------------------------------------------------------------------------------------------------------------------------------------------------------------------------------------------------------------------------------------------------------------------------------------------------------------------------------------------------------------------------------------------------------------------------------------------------------------------------------------------------------------------------------------------------------------------------------------------------------------------------------------------------------------------------------------------------------------------------------------------------------------------------------------------------------------------------------------------------------------------------------------------------------------------------------------------------------------------------------------------------------------------------------------------------------------------------------------------------------------------------------------------------------------------------------------------------------------------------------------------------------------------------------------------------------------------------------------------------------------------|
| hsa-let-7f-5p                                                            | <p>AKAP6, COL4A3BP, CPEB2, EEA1, GTF2I, HECTD2, IKZF2, RICTOR, TGFBFR3, ADRB2, CCL7, CLDN12, CNOT6L, COL1A2, COL4A1, CPEB3, E2F5, E2F6, FGD6, FNDC3A, FNDC3B, FRMD4B, HAS2, HIP1, IGF1R, MAPK8, MEF2C, MYCN, PLXNC1, PPP1R15B, PPP1R16B, PRPF38B, RANBP2, RDX, SALL3, STARD13, STK40, TET3, USP24, UTRN, VAV3, ZBTB39, ZNF689, 38200, ABCB9, ABCC5, ABHD17C, ABL2, ACER2, ACSL6, ACVR1C, ACVR2A, ADAMTS15, ADAMTS8, ADRB3, AEN, AGAP1, AHCTF1, AMOT, AMT, AP1S1, APBB3, ARG2, ARHGAP28, ARHGEF38, ARID3A, ARID3B, ARL5A, ASAP1, ATP2A2, ATP8B4, B3GNT7, BACH1, BEGAIN, BEND4, BIN3, BSN, BZW1, C14orf28, C15orf39, C19orf47, C20orf194, C5orf51, C8orf58, CADM2, CASP3, CBX5, CCDC71L, CCND2, CCNJ, CCR7, CDC25A, CDC34, CDKN1A, CEP135, CERCAM, CHD4, CLCN5, CLP1, CNTRL, COIL, COL27A1, COL3A1, COL4A2, COL4A6, COL5A2, CPA4, CPEB1, DCAF15, DCUN1D2, DDI2, DDX19A, DDX19B, DHX57, DLC1, DLST, DMD, DNA2, DNAJA2, DNAJC1, DPH3, DTX2, DTX4, DUSP1, DUSP22, DVL3, E2F2, EDEM3, EDN1, EEF2K, EFHD2, EIF4G2, ELF4, ENTPD7, EPHA4, ERCC4, ERCC6, FAM104A, FAM135A, FAM189A1, FAM214B, FASLG, FAXC, FGF11, FIGN, FNIP1, FNIP2, FRAS1, FZD3, FZD4, GABBR2, GALT, GALNT1, GALNT2, GAN, GAS7, GATM, GCNT4, GDF6, GJC1, GNG5, GNPATB, GOLT1B, GPATCH2, GPCPD1, GPR26, GXYLT1, GYG2, HAND1, HDLBP, HDX, HIC2, HIF1AN, HMGA2, HOOK1, HOXA1, HOXD1, HTR1E, IGDCC3, IGDCC4, IGF2BP1, IGF2BP2, IGF2BP3, IL13, IMPG2, INSR, IQCB1, IRS2, ITGB3, KCNC2, KCNJ11, KCTD17, KCTD21, KDM3A, KIAA0930, KIAA1958, KLF8, KLF9, KLHDC8B, KLHL31, LBR, LEPROTL1, LIMD2, LIN28A, LIN28B, LINGO1, LIPH, LIPT2, LPGAT1, LRIG2, LRIG3, MAP3K1, MAP3K9, MAP4K3, MAPK6, MARS2, MBD2, MDM4, MED28, MED8, MEIS2, MIB1, MRS2, MTDH, NAP1L1, NEK3, NGF, NHLRC3, NIPAL4, NME4, NME6, NPEPL1, NR6A1, NRAS, NYNRIN, ONECUT2, OSBPL3, OSMR, P4HA2, PALD1, PAPP, PARP8, PBX1, PBX2, PBX3, PCDH19, PCGF3, PDE12, PDP2, PDPR, PEG10, PEX11B, PGRMC1, PIGA, PIK3IP1, PLA2G3, PLAGL2, PLEKHA8, PLEKHO1, PLXND1, POGUT1, POGZ, POLR3D, PRKAR2A, PRLR, PRRX1, PRSS22, PTAFR, PTPRD, PXDN, PXT1, RAB11FIP4, RAB8B, RALB, RASGRP1, RBFOX2, RFX6, RGS16, RNF165, RNF20, RSP02, RUFY3, SALL4, SCD, SCN11A, SCN4B, SDK1, SEMA4C, SEMA4G, SENP2, SENP5, SESTD1, SFMBT1, SKIL, SLC10A7, SLC16A9, SLC20A1, SLC22A23, SLC25A27, SLC2A12, SLC30A4, SLC35D2, SLC38A9, SLC5A6, SLC5A9, SMARCA1, SMC1A, SMIM3, SNX16, SNX30, SOCS4, SPRYD4, SRD5A3, SRGAP1, STARD3NL, STARD9, STRBP, STX3, SUB1, TAF9B, TBKBP1, TECPR2, TGFBFR1, THOC2, THRSP, TMC7, TMEM167A, TMEM234, TMEM65, TMOD2, TMPPE, TMPRSS2, TNFSF9, TRANK1, TRIM41, TRIM67, TRIM71, TSPEAR, TTL4, TXLNA, UGCG, UHRF2, USP38, USP44, WDR37, WNT9B, XK, XKR8, XRN1, XYLT1, YOD1, YPEL2, ZBTB5, ZBTB8B, ZFYVE26, ZNF275, ZNF280B, ZNF322, ZNF512B, ZNF516, ZNF583, ZNF644, ZNF710, ZNF784, ZSWIM5</p> |
| hsa-miR-339-5p                                                           | <p>AKAP10, CHD1, CNOT6, PCDH17, RBM27, ZNF689, ALKBH1, BACE1, BCL2L11, BEND3, C6orf223, CASD1, CDK14, KIF1B, KLF11, KMT2A, LHX6, MAPRE1, PLEKHH1, SERTAD4, SHISA7, STOX2, TLE3, TMEM119, UBE3A, UNC5C</p>                                                                                                                                                                                                                                                                                                                                                                                                                                                                                                                                                                                                                                                                                                                                                                                                                                                                                                                                                                                                                                                                                                                                                                                                                                                                                                                                                                                                                                                                                                                                                                                                                                                                                                                                                                                                                                                                                                                                                                                                                                                                                                                                                                                                                                                                                                                                                                                                                                                                                                                                                                                           |
| Genes potentially regulated by miRNAs whose levels are decreased in NuLi |                                                                                                                                                                                                                                                                                                                                                                                                                                                                                                                                                                                                                                                                                                                                                                                                                                                                                                                                                                                                                                                                                                                                                                                                                                                                                                                                                                                                                                                                                                                                                                                                                                                                                                                                                                                                                                                                                                                                                                                                                                                                                                                                                                                                                                                                                                                                                                                                                                                                                                                                                                                                                                                                                                                                                                                                     |
| hsa-mir-146a                                                             | <p>ATXN1, ABL2, ARID4A, ARL8B, ASXL3, BNIP2, C17orf75, C6orf62, CACUL1, CAMK1D, CASP7, CCM2, ETNK1, FAM126B, FOXC1, ILF3, MICU3, NEK7, NUFIP2, PLCXD3, SIX4, SLC16A6, SLC38A1, SORT1, TBC1D5, USH2A, ZEB1, ZFX, ZNF395, ACKR3, ACTN4, ADAMTS17, ADNP2, AFAP1, AHCYL1, ARHGEF12, ATG13, ATP6V1C2, AVPR1A, BMP2, BNC2, C20orf197, C5orf63, CAND1, CD164, CD207, CDCA7, CDKN2AIP, CENPN, CHD2, CLCN6, CLEC6A, CNR2, CORO1C, CPLX2, DIRC1, DIXDC1, DMRT3, DTWD1, DUSP13, EIF4E3, ERC1, ERLIN1, ETS2, EVA1A, FANCL, FOXJ2, FOXN2, FZD4, GCC2, GFRA1, HABP2, HIC2, HIF1A, HMGCR, HOXC4, HSPD1, IDI2, IGF2R, IGSF3, IKZF1, IL17RD, IRGQ, ITGB7, ITGB8, KCNC2, KDELR3, KDM5A, KIDINS220, KLF8, KPNA1, LCOR, LGI2, LHFPL5, LIN28B, LMNB2, LMO4, LRP8, LYN, MAP3K2, MARCH6, MASP1, MBLAC2, MEA1, MED14, MEF2C, MEOX1, MTRNR2L4, MTX3, MYL12A, NEUROD4, NFAT5, NFYA, NHLH2, NNT, NPAS3, NRCAM, NSUN7, NUBP1, ONECUT2, OSBPL3, PAN3, PCDH17, PCSK5, PDS5A, PMEPA1, PPP1R3B, PRR9, PTPDC1, PTPN12, PTPN14, RAG1, RASSF8, RC3H1, RFPL4B, RIOK3, RRS1, RTN4, RUNX2, SERBP1, SERTAD2, SGCG, SH3BGR12, SHISA6, SLC16A1, SLC24A4, SLC30A4, SLC44A1, SMC04, SNAI2, SNAP23, SNAP91, SNX27, SPRED1, SPRTN, SPRY3, SPRYD7, STRADA, STXBP6, SV2B, SV2C, TAF11, TAF1B, TAOK1, TBC1D4, TFE3, TMEM154, TMEM232, TMEM59, TMEM87B, TNKS, TRABD, TRAF3IP1, TRDMT1, TRIM34, TRIM36, TRIM39, TRIM66, TRIM6-TRIM34, TXNIP, UBF1, UNC13A, VAPB, VAV3, WARS2, WDR7, WDR78, WWTR1, XPO4, YTHDF2, ZBED6CL, ZC2HC1C, ZEB2, ZFP1, ZFYVE26, ZHX3, ZKSCAN1, ZNF12, ZNF140, ZNF236, ZNF250, ZNF322, ZNF330, ZNF37A, ZNF441, ZNF709, ZNF71</p>                                                                                                                                                                                                                                                                                                                                                                                                                                                                                                                                                                                                                                                                                                                                                                                                                                                                                                                                                                                                                                                                                                                                                                                                |
| hsa-miR-146a-5p                                                          | <p>ABL2, ERBB4, SEC23IP, SORT1, ZBTB2, ZNF652, APPL1, BCORL1, CARD10, CD80, DCAF12, DDHD1, EIF4G2, ESYT2, FBXW2, FLOT2, FZD1, GALNT10, HIPK3, HNRNP, IRAK1, LRP2, MED1, MMP16, NOVA1, NUMB, PPP1R11, PTPRA, RARB, SEMA3G, SIAH2, SLC10A3, STRBP, TDRKH, TMEM120B, TRAF6, VASN, WWC2, ZFYVE1, ZNF367</p>                                                                                                                                                                                                                                                                                                                                                                                                                                                                                                                                                                                                                                                                                                                                                                                                                                                                                                                                                                                                                                                                                                                                                                                                                                                                                                                                                                                                                                                                                                                                                                                                                                                                                                                                                                                                                                                                                                                                                                                                                                                                                                                                                                                                                                                                                                                                                                                                                                                                                             |
| hsa-miR-181a-2-3p                                                        | <p>ARID4A, C17orf75, C2orf69, ILF3, SOX6, TBC1D12, TBC1D5, TTC7B, ZFX, ACVR2B, ADIPOR2, ALG14, ANTXR2, ANXA6, ARID2, ARNTL2, ATXN2, BASP1, BDP1, BLOC1S5, C11orf58, CBR4, CCNC, CEBPZ, CNOT6, COL25A1, CRK, CUL4B, DAZ1, DAZ2, DAZ3, DAZ4, DAZL, DGKG, DISC1, DYRK2, EEF1A1, EXOSC1, FAM122A, FAM227B, FBXO48, FCHO2, FLI1, GARS, GNG4, GPM6B, GRIA1, HEG1, HMGB3, HTR2C, IGF1R, KATNAL1, KLHL15, KLHL3, KPNA6, KRAS, LAMTOR3, MANBA, MAPK8, MBNL1, METTL8, MMD, MZT1, NAMPT, NETO2, NIPBL, NPR3, NRAS, NRP1,</p>                                                                                                                                                                                                                                                                                                                                                                                                                                                                                                                                                                                                                                                                                                                                                                                                                                                                                                                                                                                                                                                                                                                                                                                                                                                                                                                                                                                                                                                                                                                                                                                                                                                                                                                                                                                                                                                                                                                                                                                                                                                                                                                                                                                                                                                                                   |

|                                                                                   |                                                                                                                                                                                                                                                                                                                                                                                                                                                                                                                                                                                                                                                                                                                                                                                                                                                                                                                                                                                                                                                                                                                                                                                                                                                                                                                                                                                                                                                                                                                                                                                                                                                                                                                                                                                                                                                                                                                                                                                                                                                                                                                                                                                                                                                                                                                                                                                                                                                                                                                                                                                                                                                                                                                                                                                                                                                                                                                                                                                                                                                                                                                                                                                                                                                           |
|-----------------------------------------------------------------------------------|-----------------------------------------------------------------------------------------------------------------------------------------------------------------------------------------------------------------------------------------------------------------------------------------------------------------------------------------------------------------------------------------------------------------------------------------------------------------------------------------------------------------------------------------------------------------------------------------------------------------------------------------------------------------------------------------------------------------------------------------------------------------------------------------------------------------------------------------------------------------------------------------------------------------------------------------------------------------------------------------------------------------------------------------------------------------------------------------------------------------------------------------------------------------------------------------------------------------------------------------------------------------------------------------------------------------------------------------------------------------------------------------------------------------------------------------------------------------------------------------------------------------------------------------------------------------------------------------------------------------------------------------------------------------------------------------------------------------------------------------------------------------------------------------------------------------------------------------------------------------------------------------------------------------------------------------------------------------------------------------------------------------------------------------------------------------------------------------------------------------------------------------------------------------------------------------------------------------------------------------------------------------------------------------------------------------------------------------------------------------------------------------------------------------------------------------------------------------------------------------------------------------------------------------------------------------------------------------------------------------------------------------------------------------------------------------------------------------------------------------------------------------------------------------------------------------------------------------------------------------------------------------------------------------------------------------------------------------------------------------------------------------------------------------------------------------------------------------------------------------------------------------------------------------------------------------------------------------------------------------------------------|
|                                                                                   | OGFOD1, OSTC, PELI2, PGAM1, PHIP, PIK3C2A, PLAC8L1, PLLP, PPP1R10, PPP3R1, PPP4R2, PRDM6, PTGES2, QRFPR, QSOX2, RAB9B, RNF121, RNF135, RNF32, RRAGD, SALL1, SCLY, SEL1L, SLC36A1, SLC9A5, SLX4IP, SORBS1, STEAP2, STXBP1, SULF1, SYT1, TFAP2D, TMEM173, TXNDC5, UBLCP1, WDR38, WIPI2, ZBTB20, ZBTB41, ZNF827, ZPBP                                                                                                                                                                                                                                                                                                                                                                                                                                                                                                                                                                                                                                                                                                                                                                                                                                                                                                                                                                                                                                                                                                                                                                                                                                                                                                                                                                                                                                                                                                                                                                                                                                                                                                                                                                                                                                                                                                                                                                                                                                                                                                                                                                                                                                                                                                                                                                                                                                                                                                                                                                                                                                                                                                                                                                                                                                                                                                                                        |
| hsa-mir-23b                                                                       | ATXN1, CAMK1D, FOXC1, MAPRE1, USH2A, ABCA1, ANKRD7, BARX2, C3orf56, CCDC97, CCNJL, CHD4, CORT, DSC1, ERC2, FAM49A, GIPC3, GOLGA6L1, GOLGA6L6, GPC6, HIRIP3, IGF2, ITGA5, KCNC4, KCNIP1, KSR1, LIPG, MRPL43, MTMR4, MYEOV, OSGEP, PPA2, PPM1N, PSD3, REG1A, RNF168, SIRPA, SSMEM1, TEC, TMEM127, TMEM140, TMEM217, VSIG1, ZMYM3                                                                                                                                                                                                                                                                                                                                                                                                                                                                                                                                                                                                                                                                                                                                                                                                                                                                                                                                                                                                                                                                                                                                                                                                                                                                                                                                                                                                                                                                                                                                                                                                                                                                                                                                                                                                                                                                                                                                                                                                                                                                                                                                                                                                                                                                                                                                                                                                                                                                                                                                                                                                                                                                                                                                                                                                                                                                                                                            |
| hsa-miR-23b-3p                                                                    | ATXN1, ARL8B, ASXL3, BNIP2, C2orf69, C6orf62, CACUL1, CASP7, CCM2, ERBB4, ETNK1, FAM126B, MAPRE1, MICU3, NEK7, NUFIP2, PLCXD3, SEC23IP, SIX4, SLC16A6, SLC38A1, SOX6, TBC1D12, TTC7B, ZBTB2, ZEB1, ZNF395, ZNF652, ADAM23, ADNP, AKAP12, ALDH1A2, AMBRA1, ANKHD1, ANKRD50, ANO4, APAF1, ARHGAP20, ARNT, ARNT2, ASAH2B, ASF1A, ATP11B, ATP11C, ATP6V1E1, ATRN, ATXN7, ATXN7L3B, AUH, AUTS2, BACH2, BBX, BICD2, BLCAP, BNIP3L, BORA, BRWD1, BTAF1, C3orf52, C9orf170, CA2, CALCR, CALCR1, CAMSAP2, CAPRIN1, CBFA2T2, CBFA2T3, CBLB, CBLN1, CCDC71L, CCL7, CCNG1, CCNH, CENL2, CCSAP, CDC40, CDK17, CDS2, CELF2, CEP350, CEP63, CGGBP1, CHST7, CHSY3, CHUK, CLCN3, CLDN12, CLEC1A, CNN2, CNOT6L, CNR1, COG3, COL11A2, COL4A1, COL4A4, CPEB2, CPSF4, CREBZF, CRISPLD1, CRLF3, CSE1L, CSNK1G3, CTCF, CUL3, CXCL12, DCBLD2, DCUN1D1, DHX15, DNAJC6, DOCK3, DOK6, DPP10, DTNA, EBF3, EGR3, ELAVL4, ELF2, ELF4, ELOVL3, ENC1, ENTPD5, EOMES, EPAS1, EPHB2, ESRP1, ESRRG, EXOC3L4, FAS, FBN2, FBXO32, FGD4, FGF2, FMR1, FOSB, FOXP2, FRAT2, FREM1, FRMD5, FUT4, FUT9, FZD5, G3BP2, GAP43, GAS2L3, GGNBP2, GJA1, GLCE, GNG2, GPR22, GPRC5B, GPSM1, GREM2, GRK5, GRM5, GSK3B, GXYLT1, HAS2, HDAC7, HDX, HEXIM1, HMGB2, HNF4G, HOXA1, HOXB5, HOXD10, HS6ST2, HSPA12A, HTR2A, IGSF10, IGSF8, IL12B, IL6R, INPP5A, INTS6, INTU, IPMK, IPO5, IPPK, ISCA2, JARID2, JMJD1C, KCNIP4, KCNK5, KDM4A, KDM6A, KIAA1107, KIAA1109, KLF3, KLHL28, KPNA4, LAMP1, LHFP12, LIPH, LONRF3, LPAR1, LPGAT1, LPP, LRAT, LRIG1, LYPLA1, MAB21L2, MAGOHB, MAML2, MAP3K1, MAP3K5, MAP4K4, MAP7, MARCKS, MARCKSL1, MBTD1, MCFD2, MDFIC, MED12L, MEF2A, MEIS1, MET, MITF, MPP5, MRC1, MTF1, MTSS1, MYCT1, MYH1, MYH2, N4BP1, NAA50, NACC2, NAP1L5, NCOA1, NCOA2, NCOA6, NDFIP2, NDUFA5, NEDD4L, NEK6, NFIA, NLGN4X, NLK, NOL4, NR6A1, NRK, NRXN1, NRXN3, NUA1, NUA2, NUP50, NUS1, ORMDL1, OSBP1, PAK2, PAK6, PARD6B, PAX9, PCDH19, PDE4B, PDE7A, PDIA6, PDPK1, PGRMC2, PIK3R3, PIP4K2B, PITPNC1, PKDCC, PKIA, PKNOX1, PKP4, PLEKHH2, PLXNC1, PNMA2, PNRC1, PNRC2, POM121C, POU2F1, POU4F2, PPARGC1A, PPIF, PPM1K, PPP1R12A, PPP2R5E, PRDM1, PRDM10, PRELID2, PRKCE, PROK2, PRR14L, PRRG1, PTEN, PTGER4, PTPN4, QSER1, RAB11FIP2, RAB39B, RAB8B, RAD21, RAI14, RALYL, RAP1A, RAP2B, RBM25, RBM47, RBPM52, RCN1, RCO1, REEP1, REPS2, RGS8, RNF150, RNF38, ROBO1, ROBO2, RORA, RPRD2, RRAS2, RTF1, RUFY2, SAFB, SAFB2, SATB1, SATB2, SCN2A, SDHD, SEC14L1, SEC24A, SEMA4B, SEMA6D, SERINC5, SESN2, SESN3, SFT2D1, SH3BGR, SH3PX2A, SHROOM2, SIPA1L1, SLC12A2, SLC1A1, SLC4A4, SLC6A14, SLC7A1, SMS, SNX5, SOCS6, SOWAH, SPHKAP, SPOCK1, SPOPL, SPSB4, SRPK1, SSBP2, STARD3NL, STAT5B, STK4, STON2, STRN, STT3B, STX12, SWT1, SYNJ1, SYT4, TAB3, TBC1D15, TBR1, TCF24, TET3, TGFB2, TGIF1, TJP1, TLK1, TMED5, TMEM135, TMEM170A, TMEM33, TMEM38B, TMOD1, TMOD2, TNFAIP3, TNFAIP6, TNKS2, TNPO1, TNRC6A, TNRC6B, TNRC6C, TOP1, TOX, TOX3, TRIB1, TRIM63, TUSC2, TXLNG, TXNRD1, UBE2D1, UBE2K, UBE2O, UBE2R2, UBN2, UHMK1, UQCRCF1, USP53, VCAN, VEPH1, VGLL3, VKORC1L1, VT11B, WBP2, WBP4, WDR37, WEE1, WHAMM, WNK1, WNK3, XIAP, YOD1, ZBTB18, ZBTB34, ZBTB43, ZBTB44, ZC3H12C, ZCCHC2, ZDBF2, ZFH4, ZIC1, ZIC4, ZIC5, ZMYM2, ZNF267, ZNF287, ZNF292, ZNF420, ZNF469, ZNF655, ZNF793, ZNF839, ZNRF2 |
| Genes potentially regulated by miRNAs whose levels are increased in CuFi and Nuli |                                                                                                                                                                                                                                                                                                                                                                                                                                                                                                                                                                                                                                                                                                                                                                                                                                                                                                                                                                                                                                                                                                                                                                                                                                                                                                                                                                                                                                                                                                                                                                                                                                                                                                                                                                                                                                                                                                                                                                                                                                                                                                                                                                                                                                                                                                                                                                                                                                                                                                                                                                                                                                                                                                                                                                                                                                                                                                                                                                                                                                                                                                                                                                                                                                                           |
| hsa-miR-1275                                                                      | SERPINE2, G3BP2, MECP2, YIPF6, AP1G1, CTBS, GPATCH2L, KLHL28, MTMR4, NAALADL2, NUDT15, NXPH2, PALM2, PPM1E, SENP6, SLC30A7, SRGAP1, TACR1, TMEM38B, WIZ, ZBTB33, ZBTB7A, ZFP36L2, ZNF32, ABCF1, ACLY, ACTB, ADAR, AKNAD1, ANGPTL3, APLN, APLNR, ARRB1, ASB11, ASB4, ATCAY, ATP10B, BHLHE41, BRWD3, C12orf75, C19orf12, C8orf37, CA10, CACNA1C, CACNA1D, CACNA1E, CACNA1I, CADM4, CALCOCO1, CAMK1D, CASKIN2, CASP14, CBLN1, CBX6, CCDC148, CD8B, CDK18, CEBPG, CHAF1A, CITED4, CLDN11, CLEC2D, CNTNAP1, COL1A1, COPG1, CPSF7, CTNND2, CYP2C19, DDA1, DDX17, DIRAS2, DUSP8, DVL3, ELFN2, ELK1, ELOVL2, EMILIN3, ENY2, EXOC6B, EXOG, FAM155B, FAM50B, FBN1, FILIP1L, FOXA3, FOXN1, FOXP2, FOXP4, FSTL1, FTO, GAD2, GANAB, GATAD2B, GIMAP1, GNAT1, GPANK1, GPR3, GRIK2, GUCA1B, HMGA1, HMGB3, HMGXB3, HNRNPAB, HSD11B2, IGF1, IGF1R, IGF2, IGF2BP1, IGF2BP3, IL13RA1, INHBC, IP6K3, ISL1, JAZF1, KCNJ10, KCNV1, KCTD20, KRT23, KSR2, LALBA, LAPTM4B, LEFTY2, LIMK1, LPCAT3, LRRC28, LZTS3, MAP1A, MAPK4, MFN2, MKNK2, MPZ, MPZL2, MTHFR, MXD1, MYCT1, NAPA, NBN, NFASC, NFIC, NFIX, NKAPL, NOS1, NOVA2, NSD1, NUA1, OTOR, OVOL2, P2RX7, PAX5, PCDHB11, PCDHB13, PCDHGA1, PCDHGA10, PCDHGA11, PCDHGA12, PCDHGA2, PCDHGA3, PCDHGA4, PCDHGA5, PCDHGA6, PCDHGA7, PCDHGA8, PCDHGA9, PCDHGB1, PCDHGB2, PCDHGB3, PCDHGB4, PCDHGB6, PCDHGB7, PCDHGC3, PCDHGC4, PCDHGC5, PHYH, PIGG, PINX1, PKM, PKNOX2, PLGLB1, PLGLB2, PLP1, POU3F2, POU4F1, PPP1R3C, PPP2R2D, PPT2, PRKACA,                                                                                                                                                                                                                                                                                                                                                                                                                                                                                                                                                                                                                                                                                                                                                                                                                                                                                                                                                                                                                                                                                                                                                                                                                                                                                                                                                                                                                                                                                                                                                                                                                                                                                                                                                                                         |

|                 |                                                                                                                                                                                                                                                                                                                                                                                                                                                                                                                                                                                                                                                                                                                                                                                                                                                                                                                                                                                                                                                                                                |
|-----------------|------------------------------------------------------------------------------------------------------------------------------------------------------------------------------------------------------------------------------------------------------------------------------------------------------------------------------------------------------------------------------------------------------------------------------------------------------------------------------------------------------------------------------------------------------------------------------------------------------------------------------------------------------------------------------------------------------------------------------------------------------------------------------------------------------------------------------------------------------------------------------------------------------------------------------------------------------------------------------------------------------------------------------------------------------------------------------------------------|
|                 | <p>PRKCA, PRPH2, PRR12, PSMC2, PTGIS, RAB11FIP5, RAB3A, RAB3B, RABGGTB, RAD52, RBMX, REG3A, RNF10, RNLS, RPAIN, RSPO2, SAMD4B, SCRT2, SDC3, SDCBP2, SDHAF1, SEC24A, SERTAD2, SETBP1, SH2B1, SHISA7, SIAH1, SIAH2, SIRT2, SLAMF8, SLC10A2, SLC25A42, SLC2A4RG, SLC39A3, SLC45A3, SLC6A17, SLC7A8, SNTB1, SNX29, SOX7, SPA17, SPAG9, SPEN, SPICE1, SPIDR, SPINT1, SPOCK1, SPRED3, SPTAN1, SSR1, SSX2IP, STIM1, STS, STX8, SUCNR1, SYNPR, SYT7, TBC1D15, TBC1D7, TCEANC2, TCP11L1, THUMPD2, TM9SF2, TMEM63B, TMIGD2, TMTC2, TNNI1, TRPC4AP, TSKU, TSPAN11, TTC14, TTC17, UBE2Z, UBTf, UNC13A, UPK2, VAMP2, VDACC2, VPS37B, VPS37D, WDFY1, WDHD1, ZDHHHC15, ZFP14, ZNF131, ZNF275, ZNF444, ZNF629, ZSWIM4</p>                                                                                                                                                                                                                                                                                                                                                                                      |
| hsa-mir-132     | <p>WIZ, BTN3A2, CRTCL1, DYNCL1I2, FSTL3, IRX2, SENP3</p>                                                                                                                                                                                                                                                                                                                                                                                                                                                                                                                                                                                                                                                                                                                                                                                                                                                                                                                                                                                                                                       |
| hsa-miR-132-3p  | <p>ACVR2B, AEBP2, NLK, ZBTB20, CBL1, ETNK1, KDM5A, LIN28B, NOVA1, RB1, ARID1B, C8orf44-SGK3, CACNG2, CALU, CCDC88A, DAAM1, FEM1C, GDF5, HBEGF, MTMR10, NTNG1, OSBPL8, RASA1, RGS7BP, SGK3, SIRT1, SIX4, SRGAP1, TMEM106B, TMEM178B, USP38, ZBTB18, ZNF516, ZNF652, 37104, ADAMTS5, ADCY3, AMD1, ARID2, ATXN1, AZIN1, BOLL, BRI3, BRWD1, CAMSAP2, CC2D1B, CCDC71L, CDK19, CELSR3, CHD1, CLMN, CSDE1, DAZAP2, DCC, DCUN1D4, DPYSL3, DUSP9, DYRK2, E2F5, ELMSAN1, EP300, FAM167A, FAM91A1, FBXL20, FOXO3, GMFB, GPD2, GRM3, GTF2H1, H2AFZ, HHIP, KCMF1, KCNA6, KCNK2, KCNN3, KLF7, L3MBTL3, LEMD3, LSM11, MAP3K3, MAPK1, MED9, MEF2A, MIA3, MUC13, MYCBP2, NACC2, NFATC2, NMNAT2, NREP, PAM, PCDH10, PPM1G, PSMD12, PTBP2, PYURF, RAD54L2, RPP14, SALL1, SAP30L, SCN3A, SEC16A, SEMA6A, SERP1, SETD5, SKAP2, SLC25A28, SLC30A6, SLC6A1, SOX11, SOX5, SPPL3, SPRED1, SS18, STX16, TIMM9, TJAP1, TLN2, USP9X, ZNF521</p>                                                                                                                                                                            |
| hsa-miR-199a-3p | <p>ACVR2B, AEBP2, CREBRF, ITGA8, NLK, RFX3, SERPINE2, ADD3, APLP2, ARL15, ATAD1, BCAR3, CBL1, CPEB4, CTNNA2, EMC1, EPG5, ERBB4, ETNK1, FGF7, G3BP2, ITGA3, ITGA6, ITGB8, KDM5A, LIN28B, LRP2, MAP3K2, MECP2, NAA25, NOVA1, PHLPP2, PLCB1, PPP4R2, RAP2A, RB1, RBM47, SEMA3A, SH3GLB1, SLC24A2, TAOK1, VLDLR, ZHX1, ACVR2A, ADAM10, ADAMTS3, ADAMTSL3, ADRB1, AK4, ALX4, ANKRD44, ARHGEF3, ATRX, C2orf49, C9orf40, CBLB, CCDC85C, CD2AP, CDK17, CDK7, CELSR2, CEP85L, CHAD, CHSY3, COL12A1, CSRP2, CXADR, CYB5R4, DCBLD2, DEPDC1B, DNMT3A, EBF1, ESRP1, FAM199X, FBXW11, FN1, FUBP1, FXR1, GNA12, HIC2, IFFO2, ITPK1, KATNBL1, KDM3A, KDM6A, KIAA0319L, KLF13, KLHL3, LLGL2, LPAR4, LRRC1, MAP3K4, MAP3K5, MCFD2, MED12L, MPP7, MVB12B, NACC1, NEDD4, NET1, NID2, PAK4, PAWR, PDE4B, PIK3CB, PLAG1, PLEKHH1, PNRC1, PON2, PPP2R5E, PSD2, PTPN3, PTPRZ1, QKI, RAPH1, RPS6KA6, RUNX1, SCD, SDC2, SLC20A2, SLC39A10, SLITRK6, SP1, TAB2, TGIF2, TMEM62, TPPP, TUBGCP3, VAMP3, WDR47, ZNF217</p>                                                                                                    |
| hsa-mir-199b    | <p>ACVR2B, CREBRF, ITGA8, NLK, RFX3, ZBTB20, ADD3, ITGA3, RBM47, YIPF6, ABCA1, ANK3, AP1G1, BICC1, CACNB2, CACUL1, ETS1, FAM126B, FER, FLRT3, HAPLN1, KPNA4, MARCH7, NTNG1, PPARGC1A, RAD23B, SIRT1, ZNF516, ZNF704, ABHD17C, AFTPH, AKAP1, ARF6, ARHGAP12, ARHGAP21, ASRGL1, ATG14, ATP13A2, ATXN7, AUTS2, BCAM, BEND3, BTRC, CCDC120, CCDC43, CCDC88C, CCNJ, CCNL1, CDCA7L, CECR2, CELF2, CELSR1, CLCN3, CLIP1, COL5A3, CRYBG3, CSDC2, DDR1, DENND6A, ECE1, EIF5B, FAM222B, FZD4, FZD6, GCNT2, GIT1, GNG5, GPR63, GPR89A, GPR89B, GPRC5A, GSK3B, HIF1A, HMCN1, HSPA12A, HSPA5, INO80D, IPO8, KIAA1109, KLHL29, LIN7C, M6PR, MAB21L1, MAP3K11, MARCH8, MGAT3, MGAT4B, MICAL3, MPP5, MYRF, NAA40, NCSTN, NFIL3, NINL, NPAS2, NSG1, PAN3, PAX3, PAXBP1, PDE4D, PDPN, PI4KA, PLXNA2, PLXND1, PPFBP1, RALGAP1, RASSF2, RASSF3, RBM24, RBPM5, RGMA, RNF11, RNF38, SACS, SERPINE1, SHOC2, SLC24A3, SLC25A23, SMARCD1, SORCS3, SOS2, SULF1, SUN1, TAB3, TAF9B, TGFB2, TMEM135, TMEM245, TSPAN6, TST, UBAP1, USP31, VPS26A, WDR76, WDTC1, ZFYVE27, ZNF329, ZNF439, ZNF544, ZNF579, ZNF584, ZNF776</p> |
| hsa-miR-199b-3p | <p>ACVR2B, AEBP2, CREBRF, ITGA8, NLK, RFX3, SERPINE2, ADD3, APLP2, ARL15, ATAD1, BCAR3, CBL1, CPEB4, CTNNA2, EMC1, EPG5, ERBB4, ETNK1, FGF7, G3BP2, ITGA3, ITGA6, ITGB8, KDM5A, LIN28B, LRP2, MAP3K2, MECP2, NAA25, NOVA1, PHLPP2, PLCB1, PPP4R2, RAP2A, RB1, RBM47, SEMA3A, SH3GLB1, SLC24A2, TAOK1, VLDLR, ZHX1, ACVR2A, ADAM10, ADAMTS3, ADAMTSL3, ADRB1, AK4, ALX4, ANKRD44, ARHGEF3, ATRX, C2orf49, C9orf40, CBLB, CCDC85C, CD2AP, CDK17, CDK7, CELSR2, CEP85L, CHAD, CHSY3, COL12A1, CSRP2, CXADR, CYB5R4, DCBLD2, DEPDC1B, DNMT3A, EBF1, ESRP1, FAM199X, FBXW11, FN1, FUBP1, FXR1, GNA12, HIC2, IFFO2, ITPK1, KATNBL1, KDM3A, KDM6A, KIAA0319L, KLF13, KLHL3, LLGL2, LPAR4, LRRC1, MAP3K4, MAP3K5, MCFD2, MED12L, MPP7, MVB12B, NACC1, NEDD4, NET1, NID2, PAK4, PAWR, PDE4B, PIK3CB, PLAG1, PLEKHH1, PNRC1, PON2, PPP2R5E, PSD2, PTPN3, PTPRZ1, QKI, RAPH1, RPS6KA6, RUNX1, SCD, SDC2, SLC20A2, SLC39A10, SLITRK6, SP1, TAB2, TGIF2, TMEM62, TPPP, TUBGCP3, VAMP3, WDR47, ZNF217</p>                                                                                                    |
| hsa-mir-335     | <p>ACVR2B, AEBP2, CREBRF, ITGA8, RFX3, SERPINE2, ZBTB20, APLP2, ARL15, ATAD1, BCAR3, CPEB4, CTNNA2, EMC1, ERBB4, FGF7, ITGA6, ITGB8, LRP2, PHLPP2, PLCB1, PPP4R2, RAP2A, SEMA3A, SH3GLB1, SLC24A2, TAOK1, YIPF6, ZHX1, AAK1, ANK3, ARFGF2, ARID1B, BCOR, BICC1, C8orf44-SGK3, CACNG2, CACUL1, CCDC88A, CDK13, CEP350, CLVS2, CTBS, ETS1, FAM126B, FEM1C, FER, FLRT3, GPATCH2L, GPM6B, HAPLN1, IL1RAP, KLHL28, KPNA4, MARCH7, MTMR10, MTO1, NAALADL2, NUDT15, OSBPL8, OTUD4, PALM2, PHIP, PPARGC1A, PPM1E, PRKAA2, RAD23B, RGS7BP, RORA, SENP6, SGK3, SIX4, SLC30A7, TACR1, THSD7A, TMEM106B, TMEM178B, VAPA, WNT3, ZBTB18, ZBTB33, ZBTB7A, ZFP36L2, ZNF32, ZNF652, ZNF704, 41883, ABCB5, ABCD2, ABHD5, ACADSB, ACSL6, ACSM5, ACTR2, ACVR1C, ADAM32, ADAMTS1, ADAMTS8, ADI1, ADNP, ADO, AFF2, AFF4, AGFG1, AHDC1, AK7, AKAP2, AKAP8,</p>                                                                                                                                                                                                                                                        |



|                |                                                                                                                                                                                                                                                                                                                                                                                                                                                                                                                                                                                                                                                                                                                                                                                                                                                                                                                                                                                                                                                                                                                                                                                                                                                                                                                                                                                                                                                                                                                                                                                                                                                                                                                                                                                                                                                                                                                                                                                                                                                                                                                                                                                                                                                                                                                                                                                                                                                                                                                                                                                                                                                                                                                                                                                                                                                                                                                                                                                                                                                                                                                                                                                                                                                                                                                                                                                                                                                                                                                                                                                                                                                                                                                                                                                                                                                                                                                                                                                                                                                                                                                                                                                                                                                                                                                                                                                                                                                                                                                                                                                                                                                                                                                                                                                                                                                                                                                                                                                                                                                                                                                                                                                                                                                                                                                                                                                                                                                                                                           |
|----------------|-----------------------------------------------------------------------------------------------------------------------------------------------------------------------------------------------------------------------------------------------------------------------------------------------------------------------------------------------------------------------------------------------------------------------------------------------------------------------------------------------------------------------------------------------------------------------------------------------------------------------------------------------------------------------------------------------------------------------------------------------------------------------------------------------------------------------------------------------------------------------------------------------------------------------------------------------------------------------------------------------------------------------------------------------------------------------------------------------------------------------------------------------------------------------------------------------------------------------------------------------------------------------------------------------------------------------------------------------------------------------------------------------------------------------------------------------------------------------------------------------------------------------------------------------------------------------------------------------------------------------------------------------------------------------------------------------------------------------------------------------------------------------------------------------------------------------------------------------------------------------------------------------------------------------------------------------------------------------------------------------------------------------------------------------------------------------------------------------------------------------------------------------------------------------------------------------------------------------------------------------------------------------------------------------------------------------------------------------------------------------------------------------------------------------------------------------------------------------------------------------------------------------------------------------------------------------------------------------------------------------------------------------------------------------------------------------------------------------------------------------------------------------------------------------------------------------------------------------------------------------------------------------------------------------------------------------------------------------------------------------------------------------------------------------------------------------------------------------------------------------------------------------------------------------------------------------------------------------------------------------------------------------------------------------------------------------------------------------------------------------------------------------------------------------------------------------------------------------------------------------------------------------------------------------------------------------------------------------------------------------------------------------------------------------------------------------------------------------------------------------------------------------------------------------------------------------------------------------------------------------------------------------------------------------------------------------------------------------------------------------------------------------------------------------------------------------------------------------------------------------------------------------------------------------------------------------------------------------------------------------------------------------------------------------------------------------------------------------------------------------------------------------------------------------------------------------------------------------------------------------------------------------------------------------------------------------------------------------------------------------------------------------------------------------------------------------------------------------------------------------------------------------------------------------------------------------------------------------------------------------------------------------------------------------------------------------------------------------------------------------------------------------------------------------------------------------------------------------------------------------------------------------------------------------------------------------------------------------------------------------------------------------------------------------------------------------------------------------------------------------------------------------------------------------------------------------------------------------------------------------------------|
|                | <p>ALDH1L2, ALG10B, AMBRA1, ANGEL2, ANGPT1, ANK1, ANKRD13C, ANKRD29, ANKRD50, ANTXR2, ANXA7, AP4E1, APOOL, APPL1, ARHGAP42, ARID4B, ARL5A, ARL6IP5, ARMC1, ARMC10, ARRC3, ASB8, ASXL3, ATE1, ATG4C, ATL2, ATP1A2, ATP1B4, ATP6V1G1, ATRNL1, B3GALNT1, B3GNT5, BAG1, BBS7, BDH2, BEND6, BID, BLOC1S5, BORA, BPTF, BRCC3, BRD1, BROX, BRSK2, C10orf88, C11orf45, C14orf119, C1GALT1, C1orf53, C6orf58, C6orf62, CACNA2D1, CACNB4, CALM1, CASR, CCDC169-SOHLH2, CCDC170, CCDC50, CCDC68, CCDC85A, CCNDBP1, CCSER1, CCT4, CCT6A, CD109, CD180, CD200, CD200R1, CD47, CDC73, CDH15, CDKL2, CDKN1B, CENPJ, CEP135, CEP170, CEP68, CERS6, CES2, CFL2, CHD2, CHD9, CHPF2, CHRNAS, CLCN5, CLDND1, CLEC12B, CLIC2, CLPX, CNOT2, CNPY2, CNTN1, CNTN3, CNTN5, CNTNAP5, CNTRL, COBLL1, COL1A2, COL4A1, COL8A1, CORO2A, CPNE3, CPT1A, CPXM2, CREBZF, CRIPT, CRISPLD1, CRISPLD2, CSMD1, CSNK1G3, CSRN3, CTDSPL2, CUL3, CUL5, CXCL3, CYB5B, CYBRD1, CYP7A1, CYP7B1, DCUN1D1, DCUN1D5, DDHD1, DEFB132, DENND4C, DERA, DHX58, DIAPH1, DIAPH3, DIP2B, DLC1, DMRT2, DNAJB14, DNAJC3, DPYD, DSCAML1, DST, DTL, DUS4L, DUSP19, DYRK1A, ECT2L, EDEM3, EDNR, EFNA5, EGR3, EHF, EIF1AX, EIF2A, EIF3E, EIF4B, EIF4E3, EIF5A11, ELAVL2, ELAVL3, ELF1, ELK3, ELMO1, ELN, ELOVL7, EMB, ENPP4, EPHA4, EPHA7, ERAP1, ERC2, ERCC8, EREG, ERP44, ETF1, ETV1, EYA4, EZR, F2R, FAF2, FAM117B, FAM126A, FAM20B, FAM49A, FAM84B, FAM98A, FAT3, FEM1B, FEZF1, FGF12, FGF18, FGF9, FH, FKBP5, FMN2, FMR1, FNDC3A, FOS, FPGT, FRMD4A, FRMD4B, FRS2, FUT8, FUT9, FZD3, G6PC2, GABPA, GABRB2, GABRB3, GABRG1, GBP5, GCNT1, GGA1, GHR, GIGYF1, GLIS3, GLRX3, GLYATL3, GNB4, GNG2, GNPAT1, GNRHR, GOLGA2, GOLGA6L4, GOLGA6L9, GOSR1, GPAM, GPN3, GPR12, GPR171, GPR180, GPR85, GPRIN3, GRID2, GRIN2A, GRIN3A, GRM5, GSKIP, GTF2H5, GUCY1A2, GXYLT1, HBS1L, HELQ, HELZ, HERC2, HERC3, HIPK1, HLCS, HOMER1, HOOK3, HOXA13, HOXD13, HSCB, HSD17B12, HSPA1B, HTR2A, HTR2C, HYPK, ID2, IFT81, IGSF3, IL16, INSIG1, IPPK, IQGAP2, ISCA1, ITGA4, ITGB6, ITGBL1, JMY, KAT2B, KAZN, KCND2, KCNH7, KCNQ5, KCNT2, KCTD4, KCTD9, KIAA0408, KIAA1143, KIN, KITLG, KLF12, KLHL13, KLHL24, KLHL9, KRAS, LARP4B, LCORL, LHFPL3, LHX9, LIFR, LMAN1, LMBR1, LMO4, LMO7, LMOD2, LPGAT1, LRP1B, LRRC2, LRRC31, LRRC40, LRRTM2, LRRTM3, LSAMP, LTN1, LYPLAL1, MAATS1, MACC1, MAGEA10, MAGEE1, MAGI3, MAGT1, MANEA, MAP2K1, MAP3K9, MAP7, MAPK9, MB21D2, MBTD1, MCAM, MCTP2, MCUR1, MDGA2, MEI4, MEX3A, MIDN, MMRN1, MOSPD2, MPC1, MRPL42, MRPS36, MSH4, MSI2, MSRB3, MTRF1L, MXI1, MXRA5, MYCN, MYO6, MYRIP, N4BP2, NAA15, NAA30, NAA35, NAALAD2, NAP1L1, NAPEPLD, NAPG, NAV1, NCEH1, NCKAP1, NCOA2, NCOA5, NCOA7, NDST3, NDUFA1, NECAB1, NECAP1, NEDD4L, NEGR1, NEK1, NETO1, NEUROG1, NFIA, NHS1L, NIP1A, NIP2A, NKA1N3, NLGN1, NOL4, NOM1, NPAS3, NPPC, NR3C1, NRCAM, NRG4, NRIP1, NSFL1C, NTSC3B, NTRK2, NUFIP2, OCIAD1, ODF2L, OGN, OLFM3, ONECUT2, OPN3, OTOA, OTUD6A, OTUD6B, OXTR, P2RY1, PA2G4, PABPC4L, PAK2, PALLD, PALM2-AKAP2, PAPPA, PARN, PARP11, PARVA, PAX6, PAX8, PBRM1, PCBP1, PCDH17, PCDH7, PCGF5, PCLO, PCM1, PCMTD1, PCSK5, PDE12, PDGFD, PDIK1L, PDS5B, PER3, PGAP1, PGM2L1, PHACTR2, PHF14, PIGV, PIK3CA, PIK3CG, PIKFYVE, PLCB4, PLCL1, PLCXD3, PLEKHM3, PLOD2, PMAIP1, PNISR, PNPT1, POGUT1, POU2F1, PPAT, PPIL1, PPM1L, PPP3CA, PRDM4, PREX2, PRKAR2B, PRKCI, PRKG1, PRLR, PRMT2, PROSER2, PRPF40A, PRR14L, PRRG3, PRRG4, PSEN1, PSMD14, PTAR1, PTCHD4, PTEN, PTGDR, PUM2, PXDN, RAB1A, RAB30, RAB33B, RAB4A, RAB8B, RAD54B, RAPGEF1, RASGEF1A, RASSF6, RBM11, RBM12, RBM46, RBM7, RBMS2, RBMS3, RC3H1, RCSD1, REST, RFESD, RIC3, RIMKLB, RLIM, RMND5A, RND1, RNF112, RNF128, RNF138, RNF165, RNF169, RNF217, ROBO1, ROCK2, RP2, RPGRIP1L, RPRD1B, RPS6KA1, RPS6KA3, RPS6KB1, RTN3, RUFY2, RUNX1T1, RYR2, S100A14, SAMD5, SAMD8, SAR1B, SATB2, SBNO1, SBSN, SCN3B, SCYL2, SEL1L, SEMA3C, SEMA3D, SEMA5A, SEPHS2, SEPS2, SERPINB10, SERPINB13, SESTD1, SFMBT2, SFXN1, SGIP1, SGTB, SH3D19, SH3KBP1, SH3TC2, SHC3, SHOX2, SHROOM3, SIRT7, SLC13A1, SLC16A12, SLC17A6, SLC17A8, SLC19A2, SLC25A13, SLC25A17, SLC30A5, SLC36A4, SLC38A2, SLC4A4, SLC5A3, SLC7A11, SLC9A2, SLC9A7, SLC9C1, SLC10A2, SMAD5, SMARCA5, SMARCE1, SMIM14, SNCA, SNX13, SNX25, SOBP, SOHLH2, SOS1, SOWAHC, SP110, SPARC, SPN, SPOP, STPSSA, SRPK2, SRSF6, SSB, SSBP2, SST, ST18, ST3GAL6, STARD3NL, STATH, STC1, STEAP2, STIM2, STK38L, STON1, STON2, STRBP, STRN, STXB5P, STXB5L, SUCLG2, SUZ12, SWAP70, SYT14, SYT4, TANC2, TAOK3, TBC1D3, TBC1D3C, TBC1D3F, TBC1D3G, TBC1D3H, TBC1D4, TBCK, TBL1XR1, TBX15, TCAIM, TCEAL1, TCF4, TEAD1, THAP2, THAP9, THRB, TIPARP, TLL2, TM2D3, TM9SF3, TMED4, TMED5, TMEM136, TMEM167B, TMEM200A, TMEM237, TMEM260, TMEM33, TMEM56, TMEM74, TMEM97, TMPRSS11D, TMTC1, TMTC4, TMX1, TNFSF13B, TNIP3, TOE1, TOX3, TPH2, TRA2B, TRABD2A, TRAF5, TRDMT1, TRIM23, TRIM9, TRNP1, TRPC3, TRPM8, TRUB1, TSHZ1, TSHZ2, TTBK2, TTC21B, TTC30B, TTC33, TXNRD1, UBE2D1, UBE2D4, UBE2G2, UBE2W, UBE4A, UBL3, UFL1, UGGT1, ULBP1, USP10, USP15, USP29, USP34, UTS2, UTY, VAPB, VCAN, VPS13B, VPS29, VSIG10, VTA1, WDR17, WDR7, WWTR1, XIRP2, XPR1, XRCC4, XYLB, YAF2, YTHDF3, ZBTB10, ZBTB21, ZC3H11A, ZC3H14, ZC3H6, ZCCHC2, ZDHHC21, ZEB2, ZFAND3, ZFHX3, ZFP1, ZFP36L1, ZFP42, ZFP69, ZFX, ZIC3, ZMYM4, ZNF197, ZNF208, ZNF23, ZNF236, ZNF254, ZNF322, ZNF345, ZNF37A, ZNF426, ZNF430, ZNF440, ZNF449, ZNF470, ZNF480, ZNF559, ZNF578, ZNF655, ZNF681, ZNF682, ZNF697, ZNF763, ZNF786, ZNF793, ZNF845, ZNF850, ZNF92, ZNF99, ZNHIT6, ZSCAN23</p> |
| hsa-miR-335-5p | <p>MAP3K2, NAA25, CALU, CDK13, CEP350, DAAM1, FBXO28, MTMR4, NXPH2, PRKAA2, RASA1, VAPA, APTX, ARGLU1, ARHGAP18, CAMKK2, CASP7, CCNF, CERS5, CHFR, CNOT7, EIF5A2, F13A1, FAM107B, FAM131B, FMN1, GJA5, GLYR1, HAND1, HOXD8, HPCAL4, KAT7, KDM2B, KDM4C, MED21, MLLT3, NCKAP5, NRXN1, PGM3, PLEKHA8, POU2F3, POU5F1, PSD3, PTPRB,</p>                                                                                                                                                                                                                                                                                                                                                                                                                                                                                                                                                                                                                                                                                                                                                                                                                                                                                                                                                                                                                                                                                                                                                                                                                                                                                                                                                                                                                                                                                                                                                                                                                                                                                                                                                                                                                                                                                                                                                                                                                                                                                                                                                                                                                                                                                                                                                                                                                                                                                                                                                                                                                                                                                                                                                                                                                                                                                                                                                                                                                                                                                                                                                                                                                                                                                                                                                                                                                                                                                                                                                                                                                                                                                                                                                                                                                                                                                                                                                                                                                                                                                                                                                                                                                                                                                                                                                                                                                                                                                                                                                                                                                                                                                                                                                                                                                                                                                                                                                                                                                                                                                                                                                                      |

|                                                                          |                                                                                                                                                                                                                                                                                                                                                                                                                                                                                                                                                                                                                                                                                                                                                                                                                                                                                                                                                                                                                                                                                                                                                                                                                                                                                                                                                                                                                                                                                                                                                                                                                                                                                                                                                                                                                                                                                                                                                                                                                                                                                                                                                                                                                                                                                                                                                                                                                                                                                                                                                                                                                                                                                                                                                                                                                                                                                                                                                                                                                                                                                                                                                                                                                                                                                                                                                                                                                                                                                                                                                                                                                                                                                                                                                                                                                                                                                                                                                                                                                                                                                                                                                                                                                                                                                                                                                                                                                                                                              |
|--------------------------------------------------------------------------|------------------------------------------------------------------------------------------------------------------------------------------------------------------------------------------------------------------------------------------------------------------------------------------------------------------------------------------------------------------------------------------------------------------------------------------------------------------------------------------------------------------------------------------------------------------------------------------------------------------------------------------------------------------------------------------------------------------------------------------------------------------------------------------------------------------------------------------------------------------------------------------------------------------------------------------------------------------------------------------------------------------------------------------------------------------------------------------------------------------------------------------------------------------------------------------------------------------------------------------------------------------------------------------------------------------------------------------------------------------------------------------------------------------------------------------------------------------------------------------------------------------------------------------------------------------------------------------------------------------------------------------------------------------------------------------------------------------------------------------------------------------------------------------------------------------------------------------------------------------------------------------------------------------------------------------------------------------------------------------------------------------------------------------------------------------------------------------------------------------------------------------------------------------------------------------------------------------------------------------------------------------------------------------------------------------------------------------------------------------------------------------------------------------------------------------------------------------------------------------------------------------------------------------------------------------------------------------------------------------------------------------------------------------------------------------------------------------------------------------------------------------------------------------------------------------------------------------------------------------------------------------------------------------------------------------------------------------------------------------------------------------------------------------------------------------------------------------------------------------------------------------------------------------------------------------------------------------------------------------------------------------------------------------------------------------------------------------------------------------------------------------------------------------------------------------------------------------------------------------------------------------------------------------------------------------------------------------------------------------------------------------------------------------------------------------------------------------------------------------------------------------------------------------------------------------------------------------------------------------------------------------------------------------------------------------------------------------------------------------------------------------------------------------------------------------------------------------------------------------------------------------------------------------------------------------------------------------------------------------------------------------------------------------------------------------------------------------------------------------------------------------------------------------------------------------------------------------------------|
|                                                                          | RBFOX2, RPRM, SECISBP2L, SEPHS1, SMARCA2, SNIP1, SORCS1, SREK1IP1, TMEM59, UBE2G1, ZMPSTE24, ZRANB1                                                                                                                                                                                                                                                                                                                                                                                                                                                                                                                                                                                                                                                                                                                                                                                                                                                                                                                                                                                                                                                                                                                                                                                                                                                                                                                                                                                                                                                                                                                                                                                                                                                                                                                                                                                                                                                                                                                                                                                                                                                                                                                                                                                                                                                                                                                                                                                                                                                                                                                                                                                                                                                                                                                                                                                                                                                                                                                                                                                                                                                                                                                                                                                                                                                                                                                                                                                                                                                                                                                                                                                                                                                                                                                                                                                                                                                                                                                                                                                                                                                                                                                                                                                                                                                                                                                                                                          |
| hsa-mir-376c                                                             | ZBTB20, EPG5, AAK1, BCOR, CLVS2, GDF5, GPM6B, IL1RAP, MTO1, PHIP, RORA, USP38, ADH5, ALCAM, APEX1, ASB15, C5orf15, CDH6, EDNRB, EXOSC3, FAM81A, FIGN, GLS, GLT8D2, LATS2, LRP6, MACF1, NAIP, NEUROG2, NF1, NFE2L3, NFKBIA, PDSS1, PGR, PICALM, SCN1A, SLC2A2, SLC39A13, SLITRK1, TEP1, TMEM108, TMEM18, TMEM204, TTC22, WIPF3, ZKSCAN3, ZNF34, ZNF74                                                                                                                                                                                                                                                                                                                                                                                                                                                                                                                                                                                                                                                                                                                                                                                                                                                                                                                                                                                                                                                                                                                                                                                                                                                                                                                                                                                                                                                                                                                                                                                                                                                                                                                                                                                                                                                                                                                                                                                                                                                                                                                                                                                                                                                                                                                                                                                                                                                                                                                                                                                                                                                                                                                                                                                                                                                                                                                                                                                                                                                                                                                                                                                                                                                                                                                                                                                                                                                                                                                                                                                                                                                                                                                                                                                                                                                                                                                                                                                                                                                                                                                         |
| hsa-miR-376c-3p                                                          | VLDLR, ABCA1, ARFGEF2, CACNB2, FBXO28, HBEGF, OTUD4, THSD7A, TMEM38B, WNT3, ARFGEF1, ARID4A, B3GNT9, CDK12, CNIH2, CNTN4, CPEB3, DCAF7, DUSP11, EDN1, EN2, ESRRG, FRY, GLG1, GRIP1, GULP1, HNRNPK, HOXB7, HSDL1, IPO7, KANSL1L, KPNA2, LIX1L, MFAP3L, NEUROD6, NFIB, NR2F1, PAFAH1B1, PAPSS2, PDE8B, PHLDA2, PROX1, RABGEF1, RASAL2, RAVER2, RFTN2, RFX6, SASH1, SENP1, SLC25A37, SYF2, TGFB3, TMEM255A, YTHDF1, ZMYM2, ZNF146, ZNF746, ZSWIM6                                                                                                                                                                                                                                                                                                                                                                                                                                                                                                                                                                                                                                                                                                                                                                                                                                                                                                                                                                                                                                                                                                                                                                                                                                                                                                                                                                                                                                                                                                                                                                                                                                                                                                                                                                                                                                                                                                                                                                                                                                                                                                                                                                                                                                                                                                                                                                                                                                                                                                                                                                                                                                                                                                                                                                                                                                                                                                                                                                                                                                                                                                                                                                                                                                                                                                                                                                                                                                                                                                                                                                                                                                                                                                                                                                                                                                                                                                                                                                                                                               |
| Genes potentially regulated by miRNAs whose levels are decreased in CuFi |                                                                                                                                                                                                                                                                                                                                                                                                                                                                                                                                                                                                                                                                                                                                                                                                                                                                                                                                                                                                                                                                                                                                                                                                                                                                                                                                                                                                                                                                                                                                                                                                                                                                                                                                                                                                                                                                                                                                                                                                                                                                                                                                                                                                                                                                                                                                                                                                                                                                                                                                                                                                                                                                                                                                                                                                                                                                                                                                                                                                                                                                                                                                                                                                                                                                                                                                                                                                                                                                                                                                                                                                                                                                                                                                                                                                                                                                                                                                                                                                                                                                                                                                                                                                                                                                                                                                                                                                                                                                              |
| hsa-mir-106b                                                             | BTBD10, CLOCK, CREB5, CRYBG3, DCBLD2, EGLN3, FRS2, GABBR2, GPR137C, GXYLT1, KCNK10, MED12L, ZBTB20, ZNF236, 37104, 37500, AAK1, ABCA1, ABCG4, ABHD2, ABHD5, ABI1, ABL2, ACSL4, ADAM9, AGFG2, AHNK, AKAP11, AKAP13, AKT3, AKTIP, AMER2, ANKFY1, ANKH, ANKIB1, ANKRD13C, ANKRD17, ANKRD29, ANKRD33B, ANKRD50, ANKRD52, ANO6, AP2B1, APCDD1, APP, ARAP2, ARHGAP1, ARHGAP12, ARHGAP26, ARHGEF10, ARHGEF11, ARHGEF18, ARHGEF28, ARHGEF3, ARID4A, ARID4B, ARMC8, ATAD2, ATG14, ATG16L1, ATG2B, ATG7, ATL3, ATP1A2, ATXN1, ATXN1L, ATXN7L1, B3GALT2, BAHD1, BAMBI, BBX, BCL11B, BCL2L11, BHLHE41, BICC1, BICD2, BMPR2, BNC2, BNIP2, BRMS1L, BRWD1, BTBD7, BTG2, BTG3, C14orf28, C2CD2, C2orf69, C3orf70, C6orf120, C7orf43, CALD1, CAPN15, CAPRIN2, CC2D1A, CCDC71L, CCND1, CCNG2, CD274, CD69, CDC23, CDC37L1, CDKN1A, CENPQ, CEP120, CEP170, CEP97, CERCAM, CFL2, CHD5, CHRM2, CLIP4, CMKLR1, CMPK1, CMTR2, CNOT6L, CNOT7, CORO2B, CPEB3, CREB1, CRK, CROT, CRY2, CSRN3, CTSA, CYBRD1, DAB2, DDHD1, DDX5, DENND5B, DERL2, DNAJB9, DNAJC16, DNAJC27, DNAL1, DOCK4, DPYSL2, DPYSL5, DRD1, DUSP2, DUSP8, DYNC1L1, E2F1, E2F5, EFCAB14, EGR2, EIF5A2, ELK3, ELK4, ENPP5, ENTPD4, EPHA4, EPHA5, EPHA7, ERC1, EREG, ETV1, EZH1, F3, FAM102A, FAM117B, FAM126B, FAM129A, FAM13A, FAM13C, FAM189A1, FAM199X, FAM19A1, FAM210A, FAM219B, FAM3C, FAM45A, FASTK, FAT2, FAT4, FBXL3, FBXL5, FBXO21, FBXO31, FBXO48, FCHO2, FEM1C, FGD4, FGD5, FJX1, FLT1, FNBP1L, FNDC3B, FOXJ3, FOXK2, FRMD6, FSD1L, FYCO1, FZD3, GAB1, GLIS3, GNB5, GNS, GOLGA1, GOSR1, GPR137B, GPR6, GPR63, HAS2, HAUS8, HBP1, HECTD2, HEG1, HIF1A, HLF, HPS5, HS3ST5, HSPA8, HTR2A, IGSF10, IKZF4, IL1RAP, IL6ST, IQSEC2, IRF1, IRF9, ISM2, ITCH, ITGA4, ITGB8, ITPRI12, JAK1, KAT2B, KATNAL1, KCNB1, KCNJ10, KIAA0513, KIAA1522, KIF23, KIF26B, KIF3B, KLF11, KLF12, KLF9, KLHL15, KLHL2, KLHL28, KMT2A, KMT2B, KPNA2, KPNA3, L3MBTL3, LAMA3, LAPTM4A, LASP1, LCOR, LDLR, LDLRAP1, LHX6, LIMA1, LIMK1, LMO3, LPGAT1, LRCH1, LRIG1, LRP8, LRRCS5, LYPD6, LYST, LZIC, MAP3K2, MAP3K8, MAP3K9, MAP7, MAPK1, MAPK4, MAPRE3, MARCH8, MASTL, MCF2L, MCL1, MEX3D, MFAP3L, MFN2, MIDN, MINK1, MKNK2, MKRN1, MMP2, MMP24, MTF1, MTMR3, MYLIP, MYNN, MYT1L, NAA30, NABP1, NACC2, NAGK, NANOS1, NAPEPLD, NBEA, NCKAP5, NCOA3, NDEL1, NEDD4L, NEUROG1, NEUROG2, NFAT5, NFIB, NFIC, NHLRC3, NIN, NKIRAS1, NPAS2, NPAS3, NPAT, NPLOC4, NR2C2, NRIP3, NTN4, NTNG1, NUP35, OCRL, ORMDL3, OSBP1, OSM, OSR1, OSTM1, OTUD4, OXR1, PAFAH1B1, PANX2, PARD6B, PBX3, PCDHA1, PCDHA10, PCDHA11, PCDHA12, PCDHA13, PCDHA2, PCDHA3, PCDHA4, PCDHA5, PCDHA6, PCDHA7, PCDHA8, PCDHAC1, PCDHAC2, PDCD1LG2, PDE3B, PDGFRA, PDLIM5, PEXSL, PFKFB3, PFKP, PGBD5, PGM2L1, PHC3, PHIP, PHLPP2, PIK3R1, PITPNA, PKD1, PKD2, PLAG1, PLAGL2, PLCB1, PLEKHA3, PLS1, PLXDC2, PLXNA1, POLR3G, PPARA, PPP1R15B, PPP1R21, PPP1R3B, PPP3R1, PPP6C, PRDM6, PRR14L, PRR15, PRR16, PRRG1, PSD, PTGDR, PTHLH, PTPDC1, PTPN21, PTPN3, PTPN4, PTPRD, PURB, PKK, RAB10, RAB11FIP1, RAB11FIP5, RAB12, RAB22A, RAB30, RAB5B, RAB8B, RACGAP1, RAP2C, RAPGEFL1, RAPH1, RASA2, RASD1, RASGRF2, RASL11B, RB1CC1, RBBP7, RBL1, RBL2, REEP3, REPS2, REST, REV3L, RGL1, RGMA, RGMB, RHOC, RLIM, RNF128, RNF217, RNF6, ROCK2, RORA, RORC, RPS6KA4, RPS6KA5, RPS6KA6, RRAGD, RRM2, RUFY2, RUNX3, S1PR1, SACS, SALL1, SALL3, SAMD12, SAMD8, SAR1B, SCAMP2, SCAMP5, SCN1A, SCN2A, SCN2B, SEMA4B, SEMA7A, SERP1, SERTAD2, SESN3, SFMBT1, SGTB, SH3BP5, SH3PXD2A, SLAIN2, SLC16A6, SLC16A9, SLC17A7, SLC22A23, SLC24A2, SLC30A7, SLC33A1, SLC40A1, SLC41A1, SLC45A4, SLC46A3, SLC4A4, SLITRK2, SLITRK3, SMAD5, SMOC1, SMOC2, SNB2, SNX16, SNX8, SOCS6, SORL1, SOS1, SOWAHC, SOX4, SPOPL, SPRED1, SPTY2D1, SQSTM1, SRCIN1, SRGAP1, SRPK2, SS18L1, SSH1, SSX2IP, ST3GAL1, ST6GALNAC3, ST6GALNAC6, STAT3, STK11, STK17B, STK38, STRIP2, STXB5, STYX, SUCO, SYTL4, TAGAP, TANC1, TAOK1, TAOK3, TBC1D17, TBC1D20, TBC1D8B, TBC1D9, TENM1, TET1, TET3, TGFB1I1, TGFB2, THRA, TIAM1, TMEM100, TMEM127, TMEM167A, TMEM168, TMEM25, TMEM64, TMX3, TNFAIP1, TNFRSF21, TNKS1BP1, TNKS2, TOPORS, TP73, TPRG1L, TRIM3, TRIM36, TRIM37, TRIP10, TRIP11, TRPV6, TSG101, TSPAN9, TUSC2, TXNIP, U2SURP, UBE2Q2, UBE3C, UBXN2A, UEVLD, ULK1, UCHL1, UCHL2, UNK, UNKL, URI1, USP24, USP28, USP3, USP31, USP32, USP46, USP6, UXS1, VANG1, VASH2, VASP, VLDLR, VSX1, WDFY2, WDFY3, WDR37, WEE1, WFS1, WNK3, XRN1, YOD1, ZADH2, ZBTB18, ZBTB21, ZBTB33, ZBTB4, ZBTB41, ZBTB47, ZBTB7A, ZBTB8A, ZBTB9, ZC3H12C, |

|                 |                                                                                                                                                                                                                                                                                                                                                                                                                                                                                                                                                                                                                                                                                                        |
|-----------------|--------------------------------------------------------------------------------------------------------------------------------------------------------------------------------------------------------------------------------------------------------------------------------------------------------------------------------------------------------------------------------------------------------------------------------------------------------------------------------------------------------------------------------------------------------------------------------------------------------------------------------------------------------------------------------------------------------|
|                 | ZDHHC1, ZDHHC9, ZFAND4, ZFP91, ZFPM2, ZFYVE26, ZFYVE9, ZHX2, ZNF148, ZNF2, ZNF202, ZNF25, ZNF280B, ZNF367, ZNF512B, ZNF597, ZNF652, ZNF704, ZNF800, ZNF827, ZNFX1, ZXDA                                                                                                                                                                                                                                                                                                                                                                                                                                                                                                                                |
| hsa-miR-106b-3p | AP4S1, NR2F1                                                                                                                                                                                                                                                                                                                                                                                                                                                                                                                                                                                                                                                                                           |
| hsa-mir-31      | BTBD10, CREB5, FRS2, GABBR2, GPR137C, KCNK10, MED12L, ZNF236, 40422, AIFM2, ARRDC3, AS3MT, BACH1, BCL10, C6orf62, CDH13, CHMP4B, DAPK1, DDHD2, EHBP1, ELAVL4, FCHSD2, GPCPD1, GRHL1, GRIN2A, HAUS4, HTR3E, IL15, KIAA0232, KIAA1324, KRT36, KRTAP3-3, MBD4, NAA25, NKRF, NT5DC1, PAFAH1B2, PIK3CG, PLEKHB2, POLR2K, PRDM1, PRSS23, RCOR1, RHOXF2, RHOXF2B, RXFP1, SEC31A, SHCBP1, SIPA1L2, SYBU, TDP1, TRIT1, USP9X, VAT1L, VPS13A, ZDBF2, ZMYM2, ZMYM5                                                                                                                                                                                                                                                |
| hsa-miR-31-5p   | CLOCK, CRYBG3, DCBLD2, EGLN3, GXYLT1, ZBTB20, AHCYL1, AK4, APBB2, ARHGEF2, ATF6, ATL2, BACH2, CAMK2D, CEP85L, CIAPIN1, CLASP2, CREG1, CSMD1, DMD, DUSP7, ELAVL1, FAM53B, FGF7, FLOT1, FNDC5, GCH1, HIF1AN, HOMER1, IDE, IL34, JAZF1, KCTD20, KCTD21, KHDRBS3, LATS2, LBH, MAP1B, MGAT1, NR5A2, NUFIP2, NUMB, NUP153, OXSR1, PAX5, PAX9, PC, PCDH8, PDZD4, PEX5, PIK3C2A, POU2F1, PPP1R9A, PRKAA2, PRKAR2A, PRKCE, PSMB11, PTGFRN, RHOBTB1, RIMS3, RNF144B, RREB1, RSNB1, SATB2, SEMA6D, SGMS1, SH2D1A, SH3BGRL2, SLC1A2, SLC2A4, SLC6A6, STARD13, STAU2, STK40, SYDE2, TACC1, TBXA2R, TENM4, TFRC, TMEM145, TMEM43, TMPRSS11F, TNS1, UACA, VAPB, VAV3, VEZT, VPS26B, VPS53, WDR5, WNK1, YWHAE, ZFP36L1 |
